# Supplementary material for: Photoredox-catalyzed 2,2,2-trifluoroethylation and 2,2-difluoroethylation of alkenes with concomitant introduction of a quinoxalin-2(1H)-one moiety
Source: Royal Society of Chemistry journal article supplement (doi:10.1039/d1qo01170g), 2021-01-01

## Supporting Information

# Photoredox-catalyzed 2,2,2-trifluoroethylation and 2,2-difluoroethylation of alkenes with concomitant introduction of a quinoxalin-2(1*H*)-one moiety

Xiu Yang,<sup>a</sup> Wei-Dong Meng,<sup>a</sup> Xiu-Hua Xu,<sup>\*b</sup> and Yangen Huang<sup>\*a</sup>

<sup>a</sup> College of Chemistry, Chemical Engineering and Biotechnology, Donghua University, 2999 North Renmin Lu, Shanghai, 201620, China.

<sup>b</sup> Key Laboratory of Organofluorine Chemistry, Shanghai Institute of Organic Chemistry, University of Chinese Academy of Science, Chinese Academy of Science, 345 Lingling Lu, Shanghai 200032, China.

E-mail: [xuxiuhua@sioc.ac.cn](mailto:xuxiuhua@sioc.ac.cn), [hyg@dhu.edu.cn](mailto:hyg@dhu.edu.cn)

## Table of Contents

|                                                                                                                                                                                           |     |
|-------------------------------------------------------------------------------------------------------------------------------------------------------------------------------------------|-----|
| 1. General information.....                                                                                                                                                               | S2  |
| 2. Preparation of Substrates.....                                                                                                                                                         | S2  |
| 3. General Procedures for the three-component coupling reaction of alkenes, quinoxalin-2(1 <i>H</i> )-ones, and ICH <sub>2</sub> CF <sub>3</sub> /ICH <sub>2</sub> CF <sub>2</sub> H..... | S3  |
| 4. Control Experiments.....                                                                                                                                                               | S26 |
| 5. ORTEP Drawing of the X-Ray Crystallographic Structure of Product 3aa.....                                                                                                              | S31 |
| 6. References.....                                                                                                                                                                        | S33 |
| 7. Copies of <sup>1</sup> H, <sup>19</sup> F, and <sup>13</sup> C NMR Spectra for the Products.....                                                                                       | S34 |

## 1. General information

<sup>1</sup>H NMR (TMS as the internal standard) were recorded on a Bruker AM 400 or 600 spectrometer, <sup>13</sup>C NMR and <sup>19</sup>F NMR (CFCl<sub>3</sub> as outside standard and low field is positive) spectra were recorded on a Bruker AM 400 or 600 spectrometer. For the determination of <sup>19</sup>F NMR yield, PhCF<sub>3</sub> was used as an internal standard and the relaxation delay (d1) was set to 5 s. Chemical shifts (δ) were reported in per million (ppm), and coupling constants (J) were in Hertz (Hz). The following abbreviations were used to explain the multiplicities: s = singlet, d = doublet, t = triplet, q = quartet, m = multiplet. High resolution mass spectra (HRMS) were obtained on a GC-TOF mass spectrometer.

**Materials:** Unless otherwise noted, all reagents were obtained commercially and used without further purification. Substrates were purchased from commercial sources or prepared according to literature procedures. Reactions were performed using glassware that was flame-dried under vacuum.

## 2. Preparation of Substrates

Substrates **1a** (CAS: 100-42-5), **1b** (CAS: 611-15-4), **1c** (CAS: 1746-23-2), **1d** (CAS: 637-69-4), **1e** (CAS: 2626-16-2), **1f** (CAS: 405-99-2), **1g** (CAS: 2039-82-9), **1h** (CAS: 2039-86-3), **1i** (CAS: 2234-20-0), **1l** (CAS: 768-56-9) and **5** (CAS: 3195-24-2) were obtained commercially and used without further purification.

Substrates **1j** were prepared according to the reported literature.<sup>1</sup>

Substrates **1k** were prepared according to the reported literature.<sup>2</sup>

Substrates **1m** were prepared according to the reported literature.<sup>3</sup>

Substrates **2a**, **2c**, **2e** - **2n** were prepared according to the reported literature.<sup>4</sup>

Substrates **2q**, **2r** were prepared according to the reported literature.<sup>5</sup>

Substrates **2b** were prepared according to the reported literature.<sup>6</sup>

Substrates **2d** were prepared according to the reported literature.<sup>7</sup>

### 3. General procedure for the three-component coupling reaction of alkenes, quinoxalin-2(1*H*)-ones, and ICH<sub>2</sub>CF<sub>3</sub>/ICH<sub>2</sub>CF<sub>2</sub>H

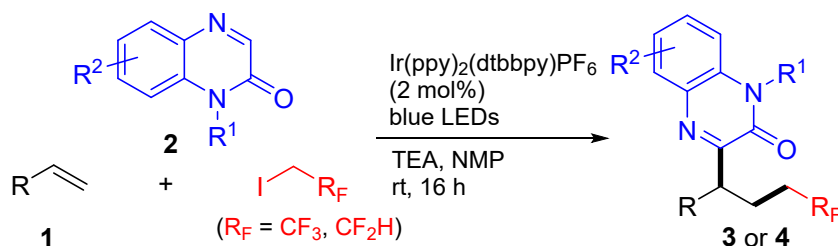

To a sealed tube equipped with a stir bar were added quinoxalin-2(1*H*)-ones **2** (0.2 mmol, 1.0 equiv), Ir(ppy)<sub>2</sub>(dtbbpy)PF<sub>6</sub> (3.7 mg, 0.004 mmol, 2 mol %). The tube was evacuated and backfilled with pure N<sub>2</sub> for three times. Afterwards, NMP (0.5 mL), alkenes **1** (2.5 equiv, 0.5 mmol), ICH<sub>2</sub>CF<sub>3</sub>/ICH<sub>2</sub>CF<sub>2</sub>H (2.0 equiv, 0.4 mmol) and TEA (3.0 equiv, 0.6 mmol) were added by syringe under N<sub>2</sub> atmosphere. The tightly sealed tube was then irradiated with a 20 W blue LEDs (the distance between the tube and the light source was about 7 cm) and simultaneously cooled by a fan to keep the reaction temperature at 25 °C. After 16 hours, the mixture was transferred into a 125 mL separating funnel which contained 20 mL H<sub>2</sub>O. The mixture was extracted with DCM (20 mL each) for three times and the combined organic layer was washed with brine (20 mL) once and dried by Na<sub>2</sub>SO<sub>4</sub>. After filtration, the filtrate was concentrated under reduced pressure to give the crude product, which was purified by flash chromatography on silica gel (PE/EtOAc = 10: 1) to give the product **3** or **4**.

#### 1-Methyl-3-(4,4,4-trifluoro-1-phenylbutyl)quinoxalin-2(1*H*)-one (**3aa**)

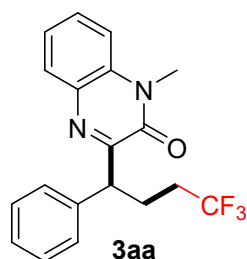

The product mixture was purified by silica gel column chromatography (PE/EtOAc = 10:1) to afford **3aa** (49.1 mg, 71%) as a yellow solid. Mp 125-127 °C; <sup>1</sup>H NMR (400 MHz, CDCl<sub>3</sub>) δ 7.88 – 7.76 (m, 1H), 7.59 – 6.95 (m, 8H), 4.59 (t, *J* = 7.8 Hz, 1H), 3.48 (s, 3H), 2.55 – 2.18 (m, 2H), 2.14 – 1.77 (m, 2H); <sup>19</sup>F NMR (376 MHz, CDCl<sub>3</sub>) δ -66.07 (t, *J* = 10.9 Hz, 3F); <sup>13</sup>C NMR (101 MHz, CDCl<sub>3</sub>) δ 158.7, 153.3, 139.0, 131.9, 131.5, 129.1, 129.0, 127.6, 127.5, 126.2 (q, *J* = 277.3 Hz), 126.1, 122.5, 112.5, 45.2, 31.0 (q, *J* = 28.6 Hz), 28.0, 25.0 (q, *J* = 2.9 Hz); IR (thin film) ν 2944, 1648,

1602, 1252, 1132, 1104, 1018, 962, 763, 744, 515  $\text{cm}^{-1}$ ; **MS** (ESI):  $m/z$  347.1  $[\text{M}+\text{H}]^+$ ; **HRMS** (ESI-TOF):  $m/z$  Calculated for  $\text{C}_{19}\text{H}_{18}\text{F}_3\text{N}_2\text{O}$   $[\text{M}+\text{H}]^+$ : 347.1366; Found: 347.1374.

### 1-Methyl-3-(4,4,4-trifluoro-1-(*o*-tolyl)butyl)quinoxalin-2(1*H*)-one (3ba)

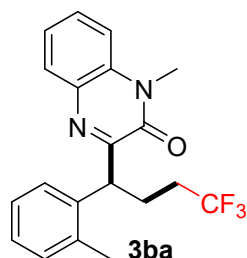

The product mixture was purified by silica gel column chromatography (PE/EtOAc = 10:1) to afford **3ba** (33.1 mg, 46%) as a white solid. Mp 114-116 °C;  **$^1\text{H}$  NMR** (400 MHz,  $\text{CDCl}_3$ )  $\delta$  7.89 (dd,  $J$  = 8.0, 1.4 Hz, 1H), 7.53 – 7.41 (m, 1H), 7.30 (t,  $J$  = 7.6 Hz, 1H), 7.22 – 7.16 (m, 1H), 7.14 – 7.05 (m, 2H), 7.04 – 6.91 (m, 2H), 4.83 (t,  $J$  = 7.3 Hz, 1H), 3.53 (s, 3H), 2.57 (s, 3H), 2.52 – 2.38 (m, 1H), 2.17 – 2.13 (m, 2H), 1.98 – 1.94 (m, 1H);  **$^{19}\text{F}$  NMR** (377 MHz,  $\text{CDCl}_3$ )  $\delta$  -66.14 (t,  $J$  = 10.5 Hz, 3F);  **$^{13}\text{C}$  NMR** (101 MHz,  $\text{CDCl}_3$ )  $\delta$  160.1, 154.5, 138.9, 137.0, 133.0, 132.5, 130.8, 130.3, 130.1, 127.3 (q,  $J$  = 277.3 Hz), 126.8 (d,  $J$  = 12.1 Hz), 126.1, 123.6, 113.6, 41.6, 31.9 (q,  $J$  = 28.5 Hz), 29.7, 29.1, 26.4 (d,  $J$  = 3.1 Hz), 19.9; **IR** (thin film)  $\nu$  2920, 1650, 1597, 1471, 1295, 1256, 1132, 1085, 973, 749, 562  $\text{cm}^{-1}$ ; **MS** (ESI):  $m/z$  361.2  $[\text{M}+\text{H}]^+$ ; **HRMS** (ESI-TOF):  $m/z$  Calculated for  $\text{C}_{20}\text{H}_{20}\text{F}_3\text{N}_2\text{O}$   $[\text{M}+\text{H}]^+$ : 361.1522; Found: 361.1529.

### 3-(1-(4-(*Tert*-butyl)phenyl)-4,4,4-trifluorobutyl)-1-methylquinoxalin-2(1*H*)-one (3ca)

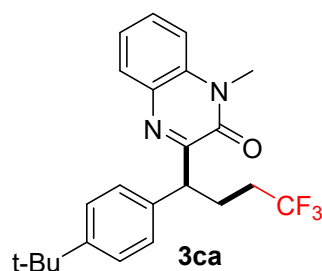

The product mixture was purified by silica gel column chromatography (PE/EtOAc = 10:1) to afford **3ca** (61.1 mg, 76%) as a white powder. Mp 109-111 °C;  **$^1\text{H}$  NMR** (400 MHz,  $\text{CDCl}_3$ )  $\delta$  7.86 (dd,  $J$  = 8.0, 1.6 Hz, 1H), 7.46 – 7.42 (m, 1H), 7.34 – 7.08 (m, 6H), 4.59 (t,  $J$  = 7.8 Hz, 1H), 3.54 (s, 3H), 2.50 – 2.18 (m, 2H), 2.13 – 1.86 (m, 2H), 1.19 (s, 9H);  **$^{19}\text{F}$  NMR** (376 MHz,  $\text{CDCl}_3$ )  $\delta$  -66.11 (t,  $J$  = 11.0 Hz, 3F);  **$^{13}\text{C}$**

**NMR** (101 MHz, CDCl<sub>3</sub>)  $\delta$  158.9, 153.4, 148.8, 135.9, 132.0, 131.6, 129.2, 129.0, 127.1, 126.3 (q,  $J = 277.3$  Hz), 124.5, 122.5, 112.5, 44.6, 33.4, 31.1 (q,  $J = 28.5$  Hz), 30.3, 28.1, 25.1 (q,  $J = 2.7$  Hz); **IR** (thin film)  $\nu$  2963, 1653, 1603, 1526, 1256, 1099, 1019, 980, 795, 757, 582, 459 cm<sup>-1</sup>; **MS** (ESI):  $m/z$  403.2 [M+H]<sup>+</sup>; **HRMS** (ESI-TOF):  $m/z$  Calculated for C<sub>23</sub>H<sub>26</sub>F<sub>3</sub>N<sub>2</sub>O [M+H]<sup>+</sup>: 403.1992; Found:403.1988.

### 1-Methyl-3-(4,4,4-trifluoro-1-(4-methoxyphenyl)butyl)quinoxalin-2(1H)-one (3da)

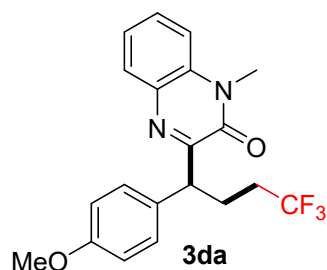

The product mixture was purified by silica gel column chromatography (PE/EtOAc = 10:1) to afford **3da** (75.3 mg, 77%) as a brown liquid. **<sup>1</sup>H NMR** (400 MHz, CDCl<sub>3</sub>)  $\delta$  7.82 (dd,  $J = 8.0, 1.4$  Hz, 1H), 7.47 – 7.32 (m, 1H), 7.31 – 7.18 (m, 3H), 7.16 – 7.07 (m, 1H), 6.82 – 6.67 (m, 2H), 4.53 (t,  $J = 7.8$  Hz, 1H), 3.63 (s, 3H), 3.49 (s, 3H), 2.45 – 2.18 (m, 2H), 2.14 – 1.83 (m, 2H); **<sup>19</sup>F NMR** (377 MHz, CDCl<sub>3</sub>)  $\delta$  -66.03 (t,  $J = 10.9$  Hz, 3F); **<sup>13</sup>C NMR** (101 MHz, CDCl<sub>3</sub>)  $\delta$  158.9, 157.6, 153.3, 132.0, 131.5, 130.9, 129.1, 128.9, 128.5, 126.3 (q,  $J = 276.5$  Hz), 122.5, 113.0, 112.5, 54.1, 44.3, 31.0 (q,  $J = 28.4$  Hz), 28.0, 25.0 (t,  $J = 2.9$  Hz); **IR** (thin film)  $\nu$  2940, 1651, 1603, 1509, 1247, 1134, 1034, 981, 833, 752, 559 cm<sup>-1</sup>; **MS** (ESI):  $m/z$  377.1 [M+H]<sup>+</sup>; **HRMS** (ESI-TOF):  $m/z$  Calculated for C<sub>20</sub>H<sub>20</sub>F<sub>3</sub>N<sub>2</sub>O<sub>2</sub> [M+H]<sup>+</sup>: 377.1471; Found: 377.1471.

### 4-(4,4,4-Trifluoro-1-(4-methyl-3-oxo-3,4-dihydroquinoxalin-2-yl)butyl)phenyl acetate (3ea)

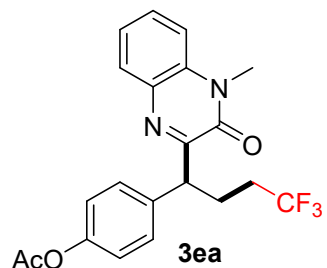

The product mixture was purified by silica gel column chromatography (PE/EtOAc = 10:1) to afford **3ea** (47.5 mg, 59%) as a yellow solid. Mp 187-189 °C; **<sup>1</sup>H NMR** (400 MHz, CDCl<sub>3</sub>)  $\delta$  7.83 (dd,  $J = 7.9, 1.5$  Hz, 1H), 7.62 – 7.32 (m, 3H), 7.30 – 7.10 (m, 2H), 6.99 – 6.77 (m, 2H), 4.62 (t,  $J = 7.9$  Hz, 1H), 3.53 (s, 3H), 2.46 – 2.43 (m, 1H),

2.29 – 2.26 (m, 1H), 2.16 (s, 3H), 2.11 – 1.88 (m, 2H);  $^{19}\text{F}$  NMR (377 MHz,  $\text{CDCl}_3$ )  $\delta$  -66.07 (t,  $J = 10.9$  Hz, 3F);  $^{13}\text{C}$  NMR (101 MHz,  $\text{CDCl}_3$ )  $\delta$  168.4, 158.4, 153.3, 148.7, 136.5, 132.0, 131.5, 129.1, 128.5, 126.2 (q,  $J = 276.3$  Hz), 122.6, 120.6, 112.6, 44.4, 31.0 (q,  $J = 28.6$  Hz), 28.1, 25.0 (d,  $J = 2.9$  Hz), 20.1; IR (thin film)  $\nu$  2962, 1769, 1645, 1602, 1471, 1258, 1188, 1016, 981, 795, 752, 570  $\text{cm}^{-1}$ ; MS (ESI):  $m/z$  405.1  $[\text{M}+\text{H}]^+$ ; HRMS (ESI-TOF):  $m/z$  Calculated for  $\text{C}_{21}\text{H}_{20}\text{F}_3\text{N}_2\text{O}_3$   $[\text{M}+\text{H}]^+$ : 405.1421; Found: 405.1416.

### 1-Methyl-3-(4,4,4-trifluoro-1-(4-fluorophenyl)butyl)quinoxalin-2(1H)-one (3fa)

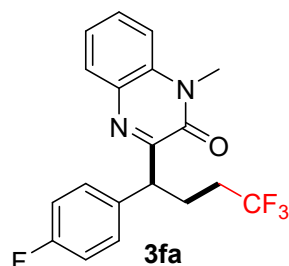

The product mixture was purified by silica gel column chromatography (PE/EtOAc = 10:1) to afford **3fa** (51.6 mg, 71%) as a brown liquid.  $^1\text{H}$  NMR (400 MHz,  $\text{CDCl}_3$ )  $\delta$  7.83 (dd,  $J = 8.0, 1.4$  Hz, 1H), 7.50 – 7.34 (m, 1H), 7.35 – 7.22 (m, 3H), 7.21 – 7.10 (m, 1H), 6.87 (t,  $J = 8.5$  Hz, 2H), 4.58 (t,  $J = 7.8$  Hz, 1H), 3.52 (s, 3H), 2.51 – 2.33 (m, 1H), 2.33 – 2.15 (m, 1H), 2.06 – 1.90 (m, 2H);  $^{19}\text{F}$  NMR (377 MHz,  $\text{CDCl}_3$ )  $\delta$  -66.08 (t,  $J = 10.8$  Hz, 3F), -115.53 (m, 1F);  $^{13}\text{C}$  NMR (101 MHz,  $\text{CDCl}_3$ )  $\delta$  160.9 (d,  $J = 245.5$  Hz), 158.5, 153.3, 134.7 (d,  $J = 3.2$  Hz), 132.0, 131.5, 129.2, 129.0 (d,  $J = 8.0$  Hz), 126.2 (q,  $J = 276.3$  Hz), 122.7, 114.4 (d,  $J = 21.3$  Hz), 112.6, 44.4, 30.9 (q,  $J = 28.6$  Hz), 28.1, 25.1 (d,  $J = 3.1$  Hz); IR (thin film)  $\nu$  2946, 1650, 1601, 1505, 1258, 1219, 1131, 979, 843, 749, 559  $\text{cm}^{-1}$ ; MS (ESI):  $m/z$  387.1  $[\text{M}+\text{Na}]^+$ ; HRMS (ESI-TOF):  $m/z$  Calculated for  $\text{C}_{19}\text{H}_{16}\text{F}_4\text{N}_2\text{O}_3\text{Na}$   $[\text{M}+\text{Na}]^+$ : 387.1091; Found: 387.1090.

### 3-(1-(4-Bromophenyl)-4,4,4-trifluorobutyl)-1-methylquinoxalin-2(1H)-one (3ga)

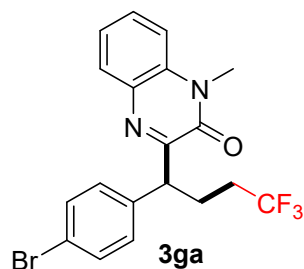

The product mixture was purified by silica gel column chromatography (PE/EtOAc = 10:1) to afford **3ga** (49.1 mg, 71%) as a brown liquid.  $^1\text{H}$  NMR (400 MHz,  $\text{CDCl}_3$ )  $\delta$

7.84 (d,  $J = 7.9$  Hz, 1H), 7.46 (t,  $J = 7.9$  Hz, 1H), 7.33 – 7.18 (m, 6H), 4.56 (t,  $J = 7.7$  Hz, 1H), 3.54 (s, 3H), 2.48 – 2.39 (m, 1H), 2.29 – 2.19 (m, 1H), 2.12 – 1.87 (m, 2H);  $^{19}\text{F}$  NMR (376 MHz,  $\text{CDCl}_3$ )  $\delta$  -66.11 (t,  $J = 10.6$  Hz, 3F);  $^{13}\text{C}$  NMR (101 MHz,  $\text{CDCl}_3$ )  $\delta$  158.2, 153.2, 138.1, 132.0, 131.5, 130.7, 129.3, 129.2, 126.1 (q,  $J = 276.3$  Hz), 122.7, 120.1, 112.6, 44.6, 30.9 (q,  $J = 28.7$  Hz), 28.1, 24.9 (d,  $J = 3.1$  Hz); IR (thin film)  $\nu$  2925, 1652, 1601, 1472, 1255, 1135, 1010, 981, 753, 556  $\text{cm}^{-1}$ ; MS (ESI):  $m/z$  447.0  $[\text{M}+\text{Na}]^+$ ; HRMS (ESI-TOF):  $m/z$  Calculated for  $\text{C}_{19}\text{H}_{16}\text{BrF}_3\text{N}_2\text{ONa}$   $[\text{M}+\text{Na}]^+$ : 447.0290; Found: 447.0302.

### 3-(1-(3-Bromophenyl)-4,4,4-trifluorobutyl)-1-methylquinoxalin-2(1H)-one (3ha)

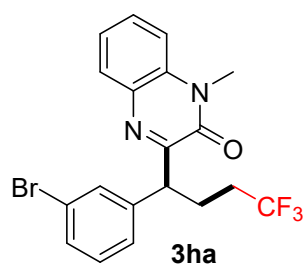

The product mixture was purified by silica gel column chromatography (PE/EtOAc = 10:1) to afford **3ha** (45.8 mg, 54%) as a white solid. Mp 89-91 °C;  $^1\text{H}$  NMR (400 MHz,  $\text{CDCl}_3$ )  $\delta$  7.87 (dd,  $J = 8.0, 1.4$  Hz, 1H), 7.58 – 7.41 (m, 2H), 7.35 – 7.15 (m, 4H), 7.09 (t,  $J = 7.8$  Hz, 1H), 4.57 (t,  $J = 7.8$  Hz, 1H), 3.56 (s, 3H), 2.52 – 2.37 (m, 1H), 2.29 – 2.19 (m, 1H), 2.13 – 1.91 (m, 2H);  $^{19}\text{F}$  NMR (377 MHz,  $\text{CDCl}_3$ )  $\delta$  -66.12 (t,  $J = 10.8$  Hz, 3F);  $^{13}\text{C}$  NMR (101 MHz,  $\text{CDCl}_3$ )  $\delta$  158.0, 153.2, 141.5, 132.0, 131.5, 130.2, 129.3, 129.2, 126.4, 126.1 (q,  $J = 277.3$  Hz), 122.7, 121.7, 112.6, 44.8, 31.0 (q,  $J = 28.7$  Hz), 28.2, 25.1 (d,  $J = 3.0$  Hz); IR (thin film)  $\nu$  2951, 1650, 1599, 1470, 1293, 1135, 984, 787, 749, 560  $\text{cm}^{-1}$ ; MS (ESI):  $m/z$  447.0  $[\text{M}+\text{Na}]^+$ ; HRMS (ESI-TOF):  $m/z$  Calculated for  $\text{C}_{19}\text{H}_{16}\text{BrF}_3\text{N}_2\text{ONa}$   $[\text{M}+\text{Na}]^+$ : 447.0290; Found: 447.0296.

### 3-(1-(2,4-Dimethylphenyl)-4,4,4-trifluorobutyl)-1-methylquinoxalin-2(1H)-one (3ia)

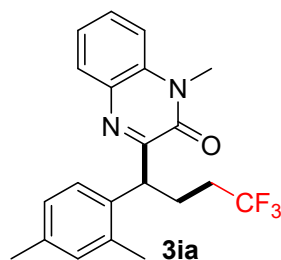

The product mixture was purified by silica gel column chromatography (PE/EtOAc =

10:1) to afford **3ia** (35.9 mg, 48%) as a white solid. Mp 131-133 °C; <sup>1</sup>H NMR (400 MHz, CDCl<sub>3</sub>) δ 7.88 (dd, *J* = 8.0, 1.4 Hz, 1H), 7.50 – 7.42 (m, 1H), 7.35 – 7.25 (m, 1H), 7.23 – 7.14 (m, 1H), 6.99 – 6.90 (m, 2H), 6.78 (dd, *J* = 7.9, 1.9 Hz, 1H), 4.78 (t, *J* = 7.3 Hz, 1H), 3.53 (s, 3H), 2.53 (s, 3H), 2.47 – 2.37 (m, 1H), 2.20 – 2.09 (m, 5H), 1.99 – 1.91 (m, 1H); <sup>19</sup>F NMR (377 MHz, CDCl<sub>3</sub>) δ -66.14 (t, *J* = 10.5 Hz, 3F); <sup>13</sup>C NMR (101 MHz, CDCl<sub>3</sub>) δ 159.2, 153.4, 135.7, 135.3, 134.7, 132.0, 131.5, 130.5, 129.2, 128.9, 126.3 (q, *J* = 277.3 Hz), 125.8, 125.7, 122.5, 112.5, 40.3, 30.9 (q, *J* = 28.4 Hz), 28.9, 25.3 (d, *J* = 2.9 Hz), 19.9, 18.8; IR (thin film) ν 2956, 1654, 1604, 1255, 1122, 1092, 1000, 966, 820, 753, 580 cm<sup>-1</sup>; MS (ESI): *m/z* 375.2 [M+H]<sup>+</sup>; HRMS (ESI-TOF): *m/z* Calculated for C<sub>21</sub>H<sub>22</sub>F<sub>3</sub>N<sub>2</sub>O [M+H]<sup>+</sup>: 375.1679; Found: 375.1676.

**1-Methyl-3-(4,4,4-trifluoro-1-((8*R*,9*S*,13*S*,14*S*)-13-methyl-17-oxo-7,8,9,11,12,13,14,15,16,17-decahydro-6*H*-cyclopenta[*a*]phenanthren-3-yl)butyl)quinoxalin-2(1*H*)-one (3ja)**

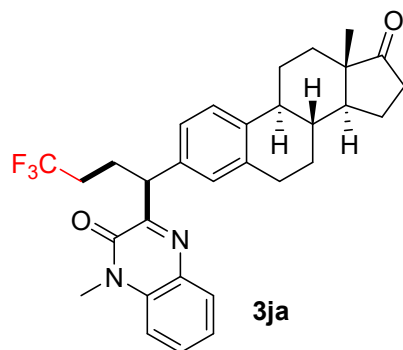

The product mixture was purified by silica gel column chromatography (PE/EtOAc = 10:1) to afford **3ja** (61.0 mg, 60%) as a white solid. Mp 119-121 °C; <sup>1</sup>H NMR (400 MHz, CDCl<sub>3</sub>) δ 7.87 (dt, *J* = 8.1, 1.6 Hz, 1H), 7.47 (tt, *J* = 7.2, 1.2 Hz, 1H), 7.33 – 7.26 (m, 1H), 7.20 (d, *J* = 9.1 Hz, 1H), 7.15 – 7.11 (m, 2H), 7.08 – 7.04 (m, 1H), 4.54 (td, *J* = 7.8, 1.7 Hz, 1H), 3.55 (s, 3H), 2.91 – 2.65 (m, 2H), 2.50 – 2.36 (m, 2H), 2.34 – 2.20 (m, 2H), 2.20 – 1.81 (m, 6H), 1.59 – 1.26 (m, 7H), 0.80 (d, *J* = 1.4 Hz, 3H); <sup>19</sup>F NMR (377 MHz, CDCl<sub>3</sub>) δ -66.10 (td, *J* = 10.6, 2.3 Hz, 3F); <sup>13</sup>C NMR (101 MHz, CDCl<sub>3</sub>) δ 158.8 (d, *J* = 2.2 Hz), 153.4, 137.5, 136.5 (d, *J* = 1.7 Hz), 135.7 (d, *J* = 1.6 Hz), 132.0, 131.6, 129.2, 129.0, 128.0, 126.3 (d, *J* = 276.3 Hz), 124.8, 124.7, 124.6, 122.6, 112.5, 49.5, 46.9, 44.8 (d, *J* = 3.3 Hz), 43.3, 37.0, 34.8, 31.1 (q, *J* = 28.6 Hz), 30.6, 28.4, 28.1, 25.5, 24.6 (d, *J* = 4.3 Hz), 20.6, 12.8; IR (thin film) ν 2924, 1737, 1655, 1602, 1472, 1256, 1133, 1006, 755, 582 cm<sup>-1</sup>; MS (ESI): *m/z* 523.3 [M+H]<sup>+</sup>; HRMS (ESI-TOF): *m/z* Calculated for C<sub>31</sub>H<sub>34</sub>F<sub>3</sub>N<sub>2</sub>O<sub>2</sub> [M+H]<sup>+</sup>: 523.2567; Found:



523.2563.

### 1-Methyl-3-(6,6,6-trifluoro-1-phenylhexan-3-yl)quinoxalin-2(1H)-one (3la)

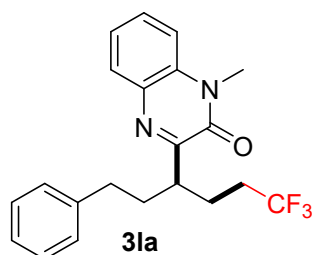

The product mixture was purified by silica gel column chromatography (PE/EtOAc = 10:1) to afford **3la** (32.2 mg, 43%) as a white solid. Mp 75-77 °C;  $^1\text{H NMR}$  (400 MHz,  $\text{CDCl}_3$ )  $\delta$  7.78 (dd,  $J = 8.0, 1.5$  Hz, 1H), 7.50 – 7.46 (m, 1H), 7.30 – 7.26 (m, 1H), 7.22 (dd,  $J = 8.4, 1.2$  Hz, 1H), 7.15 – 7.10 (m, 2H), 7.08 – 6.99 (m, 3H), 3.61 (s, 3H), 3.53 (tt,  $J = 8.2, 5.3$  Hz, 1H), 2.64 – 2.48 (m, 2H), 2.26 – 2.08 (m, 2H), 2.06 – 1.96 (m, 2H), 1.94 – 1.82 (m, 2H);  $^{19}\text{F NMR}$  (376 MHz,  $\text{CDCl}_3$ )  $\delta$  -66.44 (t,  $J = 10.6$  Hz, 3F);  $^{13}\text{C NMR}$  (101 MHz,  $\text{CDCl}_3$ )  $\delta$  160.6, 153.7, 140.8, 131.9, 131.5, 129.0, 128.9, 127.4, 127.2, 126.2 (q,  $J = 277.1$  Hz), 124.7, 122.6, 112.5, 39.2, 33.8, 32.6, 30.6 (q,  $J = 28.5$  Hz), 28.2, 23.9 (t,  $J = 3.0$  Hz); IR (thin film)  $\nu$  2933, 1645, 1593, 1258, 1134, 1034, 964, 751, 699, 458  $\text{cm}^{-1}$ ; MS (ESI):  $m/z$  375  $[\text{M}+\text{H}]^+$ ; HRMS (ESI-TOF):  $m/z$  Calculated for  $\text{C}_{21}\text{H}_{22}\text{F}_3\text{N}_2\text{O}$   $[\text{M}+\text{H}]^+$ : 375.1679; Found: 375.1679.

### 8,8,8-Trifluoro-5-(4-methyl-3-oxo-3,4-dihydroquinoxalin-2-yl)octyl benzoate (3ma)

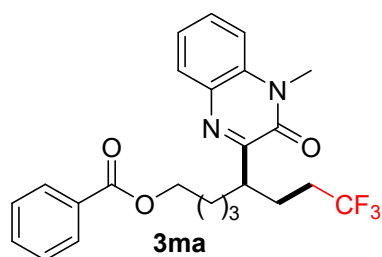

The product mixture was purified by silica gel column chromatography (PE/EtOAc = 10:1) to afford **3ma** (29.4 mg, 33%) as a brown liquid.  $^1\text{H NMR}$  (400 MHz,  $\text{CDCl}_3$ )  $\delta$  7.89 (d,  $J = 7.7$  Hz, 2H), 7.76 (d,  $J = 7.9$  Hz, 1H), 7.52 – 7.39 (m, 2H), 7.37 – 7.11 (m, 4H), 4.32 – 4.07 (m, 2H), 3.61 (s, 3H), 3.50 (t,  $J = 7.3$  Hz, 1H), 2.15 – 1.94 (m, 4H), 1.95 – 1.81 (m, 2H), 1.71 (q,  $J = 7.1$  Hz, 1H), 1.66 – 1.55 (m, 3H), 1.44 – 1.34 (m, 3H);  $^{19}\text{F NMR}$  (377 MHz,  $\text{CDCl}_3$ )  $\delta$  -66.42 (t,  $J = 10.5$  Hz, 3F);  $^{13}\text{C NMR}$  (101 MHz,  $\text{CDCl}_3$ )  $\delta$  166.6, 161.7, 154.8, 132.9, 132.8, 132.6, 130.4, 130.1, 130.0, 129.5, 128.3,

127.2 (q,  $J = 277.3$  Hz), 123.7, 113.6, 64.7, 40.0, 32.8, 31.7 (q,  $J = 28.5$  Hz), 29.2, 28.7, 24.7 (d,  $J = 3.0$  Hz), 23.6; **IR** (thin film)  $\nu$  2946, 1716, 1650, 1602, 1472, 1272, 1116, 754, 711, 426  $\text{cm}^{-1}$ ; **MS** (ESI):  $m/z$  447.2  $[\text{M}+\text{H}]^+$ ; **HRMS** (ESI-TOF):  $m/z$  Calculated for  $\text{C}_{24}\text{H}_{26}\text{F}_3\text{N}_2\text{O}_3$   $[\text{M}+\text{H}]^+$ : 447.1890; Found: 447.1890.

**3-(1-(4-(*Tert*-butyl)phenyl)-4,4,4-trifluorobutyl)-1-hexylquinoxalin-2(1*H*)-one (3cb)**

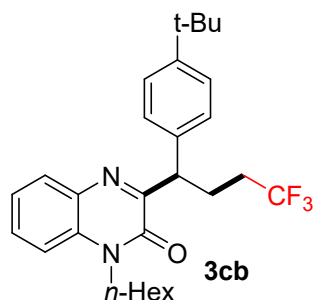

The product mixture was purified by silica gel column chromatography (PE/EtOAc = 10:1) to afford **3cb** (57.6 mg, 61%) as a white solid. Mp 139-141  $^{\circ}\text{C}$ ;  **$^1\text{H}$  NMR** (400 MHz,  $\text{CDCl}_3$ )  $\delta$  ppm 7.85 (d,  $J = 7.7$  Hz, 1H), 7.42 (t,  $J = 7.5$  Hz, 1H), 7.30 – 7.13 (m, 6H), 4.59 (t,  $J = 7.8$  Hz, 1H), 4.20 – 4.10 (m, 1H), 4.03 – 3.93 (m, 1H), 2.47 – 2.38 (m, 1H), 2.35 – 2.23 (m, 1H), 2.15 – 1.87 (m, 2H), 1.64 – 1.56 (m, 2H), 1.29 (q,  $J = 7.6$ , 7.0 Hz, 6H), 1.18 (s, 9H), 0.79 (t,  $J = 6.8$  Hz, 3H);  **$^{19}\text{F}$  NMR** (376 MHz,  $\text{CDCl}_3$ )  $\delta$  ppm -66.12 (t,  $J = 10.9$  Hz, 3F);  **$^{13}\text{C}$  NMR** (101 MHz,  $\text{CDCl}_3$ )  $\delta$  ppm 159.0, 153.1, 148.7, 135.9, 131.9, 131.2, 129.4, 128.8, 127.1, 126.3 (q,  $J = 277.3$  Hz), 124.5, 122.3, 112.5, 44.5, 41.5, 33.4, 31.1 (q,  $J = 28.6$  Hz), 30.4, 30.3, 26.1, 25.6, 25.1 (d,  $J = 2.9$  Hz), 21.5, 12.9; **IR** (thin film)  $\nu$  2960, 1651, 1602, 1308, 1257, 1099, 1002, 756, 587, 465  $\text{cm}^{-1}$ ; **MS** (ESI):  $m/z$  473.3  $[\text{M}+\text{H}]^+$ ; **HRMS** (ESI-TOF):  $m/z$  Calculated for  $\text{C}_{28}\text{H}_{37}\text{F}_3\text{N}_2\text{O}$   $[\text{M}+\text{H}]^+$ : 473.2774; Found: 473.2774.

**Ethyl 2-(3-(1-(4-(*tert*-butyl)phenyl)-4,4,4-trifluorobutyl)-2-oxoquinoxalin-1(2*H*)-yl)acetate (3cc)**

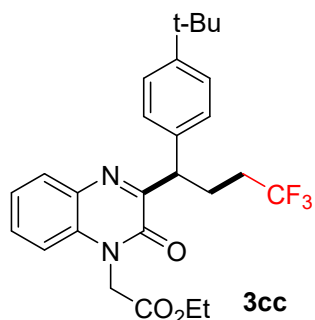

The product mixture was purified by silica gel column chromatography (PE/EtOAc =

10:1) to afford **3cc** (68.3 mg, 72%) as a white powder. Mp 127-129 °C; <sup>1</sup>H NMR (400 MHz, CDCl<sub>3</sub>) δ 7.87 (d, *J* = 7.6 Hz, 1H), 7.40 (t, *J* = 7.4 Hz, 1H), 7.30 – 7.15 (m, 5H), 6.94 (d, *J* = 8.3 Hz, 1H), 4.98 (d, *J* = 17.3 Hz, 1H), 4.72 (d, *J* = 17.3 Hz, 1H), 4.56 (t, *J* = 7.8 Hz, 1H), 4.17 – 4.02 (m, 2H), 2.46 – 2.38 (m, 1H), 2.35 – 2.25 (m, 1H), 2.13 – 1.88 (m, 2H), 1.18 (s, 9H), 1.12 (t, *J* = 7.1 Hz, 3H); <sup>19</sup>F NMR (377 MHz, CDCl<sub>3</sub>) δ -66.08 (t, *J* = 10.9 Hz, 3F); <sup>13</sup>C NMR (101 MHz, CDCl<sub>3</sub>) δ 166.0, 158.8, 152.9, 148.9, 135.6, 131.6, 131.1, 129.5, 129.1, 127.1, 126.3 (q, *J* = 277.3 Hz), 124.6, 122.9, 112.0, 61.0, 44.7, 42.6, 33.4, 31.0 (q, *J* = 28.7 Hz), 30.3, 25.0 (d, *J* = 3.0 Hz), 13.0; IR (thin film) ν 2964, 1755, 1657, 1258, 1202, 1097, 1019, 794, 757, 575 cm<sup>-1</sup>; MS (ESI): *m/z* 497.2 [M+Na]<sup>+</sup>; HRMS (ESI-TOF): *m/z* Calculated for C<sub>26</sub>H<sub>29</sub>F<sub>3</sub>N<sub>2</sub>O<sub>3</sub>Na [M+Na]<sup>+</sup>: 497.2023; Found: 497.2021.

**3-(1-(4-(*Tert*-butyl)phenyl)-4,4,4-trifluorobutyl)-1-(2-oxo-2-phenylethyl)quinoxalin-2(1*H*)-one (3cd)**

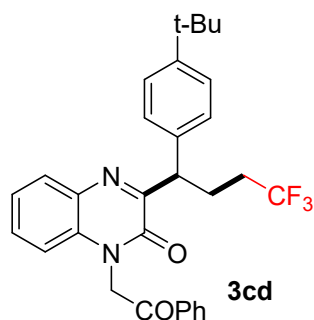

The product mixture was purified by silica gel column chromatography (PE/EtOAc = 10:1) to afford **3cd** (51.6 mg, 51%) as a white solid. Mp 179-181 °C; <sup>1</sup>H NMR (400 MHz, CDCl<sub>3</sub>) δ 7.90 – 7.86 (m, 3H), 7.57 – 7.47 (m, 1H), 7.38 (t, *J* = 7.8 Hz, 2H), 7.32 – 7.16 (m, 6H), 6.78 (dd, *J* = 8.2, 1.3 Hz, 1H), 5.65 (d, *J* = 17.6 Hz, 1H), 5.36 (d, *J* = 17.5 Hz, 1H), 4.55 (t, *J* = 7.8 Hz, 1H), 2.49 – 2.39 (m, 1H), 2.35 – 2.25 (m, 1H), 2.13 – 1.87 (m, 2H), 1.18 (s, 9H); <sup>19</sup>F NMR (376 MHz, CDCl<sub>3</sub>) δ -66.03 (t, *J* = 10.9 Hz, 3F); <sup>13</sup>C NMR (101 MHz, CDCl<sub>3</sub>) δ 190.1, 158.6, 153.1, 148.8, 135.7, 133.4, 133.2, 131.7, 131.4, 129.4, 129.0, 128.0, 127.1, 127.0, 126.3 (q, *J* = 277.3 Hz), 124.6, 122.7, 112.4, 47.6, 44.7, 33.4, 31.0 (q, *J* = 28.5 Hz), 30.3, 25.0 (d, *J* = 3.1 Hz); IR (thin film) ν 2966, 1705, 1656, 1600, 1297, 1220, 981, 842, 751, 583 cm<sup>-1</sup>; MS (ESI): *m/z* 507.2 [M+H]<sup>+</sup>; HRMS (ESI-TOF): *m/z* Calculated for C<sub>30</sub>H<sub>30</sub>F<sub>3</sub>N<sub>2</sub>O<sub>2</sub> [M+H]<sup>+</sup>: 507.2254; Found: 507.2243.

**1-Benzyl-3-(1-(4-(*tert*-butyl)phenyl)-4,4,4-trifluorobutyl)quinoxalin-2(1*H*)-one (3ce)**

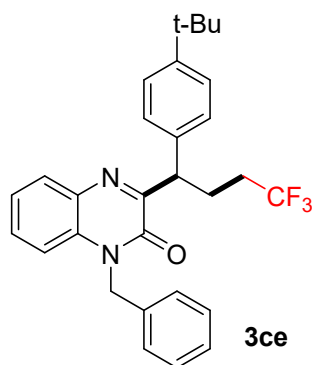

The product mixture was purified by silica gel column chromatography (PE/EtOAc = 10:1) to afford **3ce** (51.6 mg, 54%) as a yellow solid. Mp 155-157 °C;  $^1\text{H NMR}$  (400 MHz,  $\text{CDCl}_3$ )  $\delta$  7.85 (d,  $J = 7.7$  Hz, 1H), 7.41 – 6.91 (m, 14H), 5.44 (d,  $J = 15.6$  Hz, 1H), 5.17 (d,  $J = 15.6$  Hz, 1H), 4.65 (t,  $J = 7.7$  Hz, 1H), 2.51 – 2.25 (m, 2H), 2.18 – 1.88 (m, 2H), 1.19 (s, 9H);  $^{19}\text{F NMR}$  (376 MHz,  $\text{CDCl}_3$ )  $\delta$  -66.04 (t,  $J = 10.9$  Hz, 3F);  $^{13}\text{C NMR}$  (101 MHz,  $\text{CDCl}_3$ )  $\delta$  159.2, 153.4, 148.8, 135.8, 134.1, 131.8, 131.3, 129.3, 128.9, 127.8, 127.1, 126.6, 126.3 (q,  $J = 277.3$  Hz), 125.8, 124.5, 122.6, 113.3, 44.9, 44.7, 33.4, 31.1 (q,  $J = 28.5$  Hz), 30.3, 25.1 (d,  $J = 3.1$  Hz); **IR** (thin film)  $\nu$  2967, 1650, 1602, 1452, 1256, 1132, 1003, 756, 697, 581  $\text{cm}^{-1}$ ; **MS** (ESI):  $m/z$  479.2 [M+H] $^+$ ; **HRMS** (ESI-TOF):  $m/z$  Calculated for  $\text{C}_{29}\text{H}_{30}\text{F}_3\text{N}_2\text{O}$  [M+H] $^+$ : 479.2305; Found: 479.2299.

**3-(1-(4-(tert-butyl)phenyl)-4,4,4-trifluorobutyl)-1-(4-methylbenzyl)quinoxalin-2(1H)-one (3cf)**

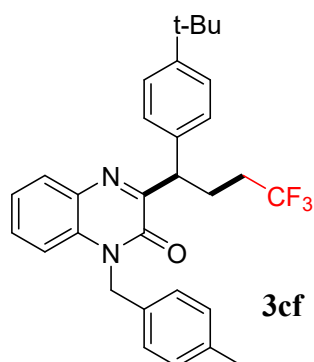

The product mixture was purified by silica gel column chromatography (PE/EtOAc = 10:1) to afford **3cf** (56.1 mg, 57%) as a white solid. Mp 169-171 °C;  $^1\text{H NMR}$  (400 MHz,  $\text{CDCl}_3$ )  $\delta$  7.83 (dd,  $J = 8.0, 1.6$  Hz, 1H), 7.31 – 7.08 (m, 7H), 6.95 (s, 4H), 5.39 (d,  $J = 15.5$  Hz, 1H), 5.10 (d,  $J = 15.5$  Hz, 1H), 4.64 (t,  $J = 7.8$  Hz, 1H), 2.49 – 2.24 (m, 2H), 2.16 (s, 3H), 2.11 – 1.88 (m, 2H), 1.18 (s, 9H);  $^{19}\text{F NMR}$  (376 MHz,  $\text{CDCl}_3$ )  $\delta$  -66.02 (t,  $J = 10.8$  Hz, 3F);  $^{13}\text{C NMR}$  (101 MHz,  $\text{CDCl}_3$ )  $\delta$  159.2, 153.4, 148.8, 136.3, 135.8, 131.8, 131.3, 131.2, 129.2, 128.9, 128.5, 127.1, 126.3 (q,  $J = 277.3$  Hz),

125.8, 124.5, 122.5, 113.3, 44.7, 44.6, 33.4, 31.1 (q,  $J = 28.5$  Hz), 30.3, 25.1 (d,  $J = 3.0$  Hz), 21.3; **IR** (thin film)  $\nu$  2961, 1651, 1602, 1257, 1169, 1099, 1005, 795, 757, 580  $\text{cm}^{-1}$ ; **MS** (ESI):  $m/z$  493.2  $[\text{M}+\text{H}]^+$ ; **HRMS** (ESI-TOF):  $m/z$  Calculated for  $\text{C}_{30}\text{H}_{32}\text{F}_3\text{N}_2\text{O}$   $[\text{M}+\text{H}]^+$ : 493.2461; Found: 493.2449.

**3-(1-(4-(*Tert*-butyl)phenyl)-4,4,4-trifluorobutyl)-1-(4-methoxybenzyl)quinoxalin-2(1*H*)-one (3cg)**

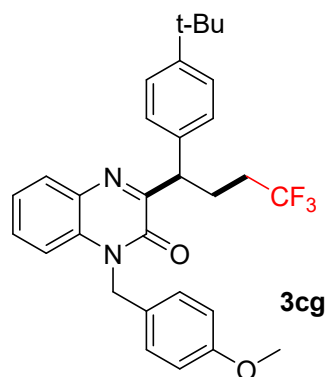

The product mixture was purified by silica gel column chromatography (PE/EtOAc = 10:1) to afford **3cg** (52.9 mg, 52%) as a yellow solid. Mp 137-139 °C;  **$^1\text{H}$  NMR** (400 MHz,  $\text{CDCl}_3$ )  $\delta$  7.83 (dd,  $J = 7.9, 1.6$  Hz, 1H), 7.31 – 7.09 (m, 7H), 7.00 (d,  $J = 8.7$  Hz, 2H), 6.68 (d,  $J = 8.7$  Hz, 2H), 5.36 (d,  $J = 15.4$  Hz, 1H), 5.09 (d,  $J = 15.3$  Hz, 1H), 4.64 (t,  $J = 7.8$  Hz, 1H), 3.61 (s, 3H), 2.53 – 2.20 (m, 2H), 2.18 – 1.83 (m, 2H), 1.18 (s, 9H);  **$^{19}\text{F}$  NMR** (376 MHz,  $\text{CDCl}_3$ )  $\delta$  -66.02 (t,  $J = 10.9$  Hz, 3F);  **$^{13}\text{C}$  NMR** (101 MHz,  $\text{CDCl}_3$ )  $\delta$  159.2, 158.0, 153.4, 148.8, 135.9, 131.8, 131.3, 129.3, 128.8, 127.3, 127.1, 126.3 (q,  $J = 277.3$  Hz), 126.2, 124.5, 122.5, 113.2, 113.1, 54.1, 44.7, 44.4, 33.4, 31.1 (q,  $J = 28.7$  Hz), 30.3, 25.1 (d,  $J = 3.0$  Hz); **IR** (thin film)  $\nu$  2962, 1652, 1602, 1516, 1254, 1099, 809, 758, 581  $\text{cm}^{-1}$ ; **MS** (ESI):  $m/z$  509.2  $[\text{M}+\text{H}]^+$ ; **HRMS** (ESI-TOF):  $m/z$  Calculated for  $\text{C}_{30}\text{H}_{32}\text{F}_3\text{N}_2\text{O}_2$   $[\text{M}+\text{H}]^+$ : 509.2410; Found: 509.2406.

**1-([1,1'-Biphenyl]-4-ylmethyl)-3-(1-(4-(*tert*-butyl)phenyl)-4,4,4-trifluorobutyl)quinoxalin-2(1*H*)-one (3ch)**

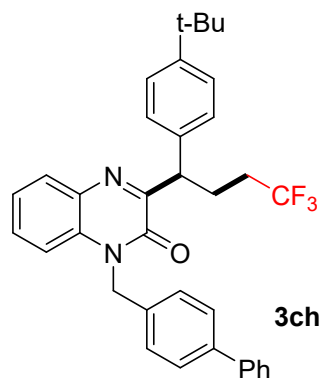

The product mixture was purified by silica gel column chromatography (PE/EtOAc = 10:1) to afford **3ch** (59.8 mg, 54%) as a white solid. Mp 189-191 °C;  $^1\text{H NMR}$  (400 MHz,  $\text{CDCl}_3$ )  $\delta$  7.95 – 7.79 (m, 1H), 7.55 – 6.95 (m, 16H), 5.46 (d,  $J = 15.7$  Hz, 1H), 5.16 (d,  $J = 15.8$  Hz, 1H), 4.65 (t,  $J = 7.8$  Hz, 1H), 2.52 – 2.25 (m, 2H), 2.15 – 1.84 (m, 2H), 1.18 (s, 9H);  $^{19}\text{F NMR}$  (377 MHz,  $\text{CDCl}_3$ )  $\delta$  -65.93 (t,  $J = 10.8$  Hz, 3F);  $^{13}\text{C NMR}$  (101 MHz,  $\text{CDCl}_3$ )  $\delta$  159.1, 153.4, 148.8, 139.6, 139.4, 135.8, 133.1, 131.8, 131.3, 129.3, 128.9, 127.7, 127.1, 126.5, 126.4, 126.3 (q,  $J = 277.3$  Hz), 126.2, 125.9, 124.5, 122.6, 44.7, 33.4, 31.1 (q,  $J = 28.5$  Hz), 30.3, 25.1 (d,  $J = 3.1$  Hz); **IR** (thin film)  $\nu$  2947, 1656, 1257, 1144, 1001, 959, 823, 757, 701, 583  $\text{cm}^{-1}$ ; **MS** (ESI):  $m/z$  555.3  $[\text{M}+\text{H}]^+$ ; **HRMS** (ESI-TOF):  $m/z$  Calculated for  $\text{C}_{35}\text{H}_{34}\text{F}_3\text{N}_2\text{O}$   $[\text{M}+\text{H}]^+$ : 555.2618; Found: 555.2632.

**Ethyl 4-((3-(1-(4-(*tert*-butyl)phenyl)-4,4,4-trifluorobutyl)-2-oxoquinoxalin-1(2H)-yl)methyl)benzoate (3ci)**

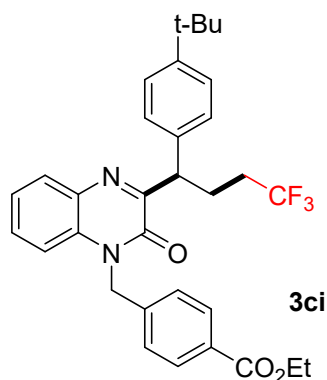

The product mixture was purified by silica gel column chromatography (PE/EtOAc = 10:1) to afford **3ci** (66.0 mg, 60%) as a white solid. Mp 150-152 °C;  $^1\text{H NMR}$  (400 MHz,  $\text{CDCl}_3$ )  $\delta$  7.85 (t,  $J = 8.6$  Hz, 3H), 7.46 – 7.14 (m, 6H), 7.05 (dd,  $J = 27.8, 8.1$  Hz, 3H), 5.47 (d,  $J = 16.1$  Hz, 1H), 5.23 (d,  $J = 16.0$  Hz, 1H), 4.63 (t,  $J = 7.8$  Hz, 1H), 4.24 (q,  $J = 7.1$  Hz, 1H), 2.54 – 2.24 (m, 2H), 2.13 – 1.84 (m, 2H), 1.25 (t,  $J = 7.1$  Hz,

3H), 1.19 (s, 9H);  $^{19}\text{F}$  NMR (377 MHz,  $\text{CDCl}_3$ )  $\delta$  -66.02 (t,  $J = 10.8$  Hz, 3F);  $^{13}\text{C}$  NMR (101 MHz,  $\text{CDCl}_3$ )  $\delta$  165.0, 159.1, 153.3, 148.9, 139.2, 135.7, 131.8, 131.1, 129.4, 129.1, 129.0, 128.9, 127.1, 126.3 (q,  $J = 277.3$  Hz), 125.7, 124.6, 122.8, 113.0, 60.0, 44.8, 44.7, 33.4, 31.1 (q,  $J = 28.6$  Hz), 30.3, 25.0 (d,  $J = 3.0$  Hz), 13.2; IR (thin film)  $\nu$  2965, 1716, 1664, 1602, 1468, 1277, 1255, 1103, 820, 750, 579  $\text{cm}^{-1}$ ; MS (ESI):  $m/z$  573.2  $[\text{M}+\text{Na}]^+$ ; HRMS (ESI-TOF):  $m/z$  Calculated for  $\text{C}_{32}\text{H}_{33}\text{F}_3\text{N}_2\text{O}_3\text{Na}$   $[\text{M}+\text{Na}]^+$ : 573.2336; Found: 573.2325.

**4-((3-(1-(4-(*Tert*-butyl)phenyl)-4,4,4-trifluorobutyl)-2-oxoquinoxalin-1(2*H*)-yl)methyl)benzotrile (3cj)**

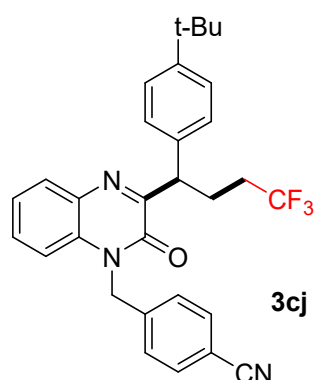

The product mixture was purified by silica gel column chromatography (PE/EtOAc = 10:1) to afford **3cj** (43.3 mg, 43%) as a white solid. Mp 153-155  $^{\circ}\text{C}$ ;  $^1\text{H}$  NMR (400 MHz,  $\text{CDCl}_3$ )  $\delta$  7.90 (dd,  $J = 7.9, 1.6$  Hz, 1H), 7.48 (d,  $J = 8.0$  Hz, 2H), 7.39 – 7.09 (m, 8H), 6.99 (dd,  $J = 8.3, 1.2$  Hz, 1H), 5.47 (d,  $J = 16.3$  Hz, 1H), 5.25 (d,  $J = 16.3$  Hz, 1H), 4.62 (t,  $J = 7.8$  Hz, 1H), 2.53 – 2.26 (m, 2H), 2.14 – 1.95 (m, 2H), 1.20 (s, 9H);  $^{19}\text{F}$  NMR (377 MHz,  $\text{CDCl}_3$ )  $\delta$  -66.01 (t,  $J = 10.9$  Hz, 3F);  $^{13}\text{C}$  NMR (101 MHz,  $\text{CDCl}_3$ )  $\delta$  159.1, 153.2, 149.0, 139.5, 135.5, 131.8, 131.7, 130.9, 129.6, 129.2, 127.1, 126.5, 126.3 (q,  $J = 277.3$  Hz), 124.6, 123.0, 117.3, 112.7, 110.7, 44.7, 44.6, 33.4, 31.0 (q,  $J = 28.6$  Hz), 30.3, 25.0 (d,  $J = 3.0$  Hz); IR (thin film)  $\nu$  2963, 2229, 1671, 1604, 1255, 1099, 962, 811, 760, 580  $\text{cm}^{-1}$ ; MS (ESI):  $m/z$  504.2  $[\text{M}+\text{H}]^+$ ; HRMS (ESI-TOF):  $m/z$  Calculated for  $\text{C}_{30}\text{H}_{29}\text{F}_3\text{N}_3\text{O}$   $[\text{M}+\text{H}]^+$ : 504.2257; Found: 504.2256.

**3-(1-(4-(*Tert*-butyl)phenyl)-4,4,4-trifluorobutyl)-1-(4-fluorobenzyl)quinoxalin-2(1*H*)-one (3ck)**

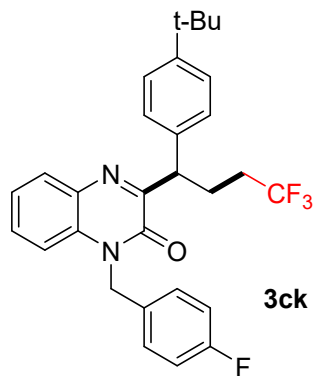

The product mixture was purified by silica gel column chromatography (PE/EtOAc = 10:1) to afford **3ck** (39.7 mg, 40%) as a white solid. Mp 149-151 °C; <sup>1</sup>H NMR (400 MHz, CDCl<sub>3</sub>) δ 7.86 (d, *J* = 7.9 Hz, 1H), 7.43 – 6.95 (m, 9H), 6.84 (t, *J* = 8.4 Hz, 2H), 5.38 (d, *J* = 15.5 Hz, 1H), 5.28 – 5.07 (m, 1H), 4.63 (t, *J* = 7.8 Hz, 1H), 2.50 – 2.23 (m, 2H), 2.18 – 1.85 (m, 2H), 1.19 (s, 9H); <sup>19</sup>F NMR (376 MHz, CDCl<sub>3</sub>) δ -66.04 (t, *J* = 11.0 Hz, 3F), -114.37 (m, 1F); <sup>13</sup>C NMR (101 MHz, CDCl<sub>3</sub>) δ 162.4, 159.9, 159.2, 153.4, 148.9, 135.7, 131.9, 131.2, 129.9 (d, *J* = 3.3 Hz), 129.4, 129.0, 127.7, 127.6, 127.1, 126.1 (q, *J* = 277.3 Hz), 124.6, 122.7, 114.9, 114.7, 113.0, 44.7, 44.3, 33.4, 31.1 (q, *J* = 28.5 Hz), 30.3, 25.0; IR (thin film) ν 2962, 1651, 1603, 1256, 1095, 1002, 820, 765, 580, 499 cm<sup>-1</sup>; MS (ESI): *m/z* 519.2 [M+Na]<sup>+</sup>; HRMS (ESI-TOF): *m/z* Calculated for C<sub>29</sub>H<sub>28</sub>F<sub>4</sub>N<sub>2</sub>O<sub>2</sub>Na [M+Na]<sup>+</sup>: 519.2030; Found: 519.2016.

### 3-(1-(4-(*Tert*-butyl)phenyl)-4,4,4-trifluorobutyl)-1-(2-chlorobenzyl)quinoxalin-2(1*H*)-one (**3cl**)

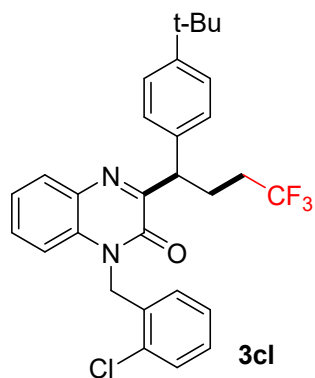

The product mixture was purified by silica gel column chromatography (PE/EtOAc = 10:1) to afford **3cl** (64.8 mg, 64%) as a white solid. Mp 182-184 °C; <sup>1</sup>H NMR (400 MHz, CDCl<sub>3</sub>) δ 7.87 (dd, *J* = 7.8, 1.7 Hz, 1H), 7.46 – 7.17 (m, 7H), 7.10 – 6.99 (m, 1H), 6.96 – 6.82 (m, 2H), 6.48 (d, *J* = 7.8 Hz, 1H), 5.47 (d, *J* = 16.8 Hz, 1H), 5.28 (d, *J* = 16.7 Hz, 1H), 4.64 (t, *J* = 7.8 Hz, 1H), 2.51 – 2.29 (m, 2H), 2.18 – 1.86 (m, 2H),



1.18 (s, 9H);  $^{19}\text{F}$  NMR (377 MHz,  $\text{CDCl}_3$ )  $\delta$  -66.01 (t,  $J = 10.9$  Hz, 3F);  $^{13}\text{C}$  NMR (101 MHz,  $\text{CDCl}_3$ )  $\delta$  159.1, 153.4, 148.9, 135.7, 131.8, 131.6, 131.1, 131.0, 129.3, 129.1, 128.7, 127.7, 127.1, 126.3 (q,  $J = 277.3$  Hz), 126.2, 125.7, 124.6, 122.8, 113.2, 44.7, 42.6, 33.4, 31.1 (q,  $J = 28.7$  Hz), 30.3, 25.0 (d,  $J = 3.0$  Hz); IR (thin film)  $\nu$  2963, 1655, 1604, 1447, 1258, 1099, 961, 822, 760, 582  $\text{cm}^{-1}$ ; MS (ESI):  $m/z$  535.2  $[\text{M}+\text{Na}]^+$ ; HRMS (ESI-TOF):  $m/z$  Calculated for  $\text{C}_{29}\text{H}_{28}\text{ClF}_3\text{N}_2\text{ONa}$   $[\text{M}+\text{Na}]^+$ : 535.1735; Found: 535.1746.

**1-(3-Bromobenzyl)-3-(1-(4-(*tert*-butyl)phenyl)-4,4,4-trifluorobutyl)quinoxalin-2(1*H*)-one (3cm)**

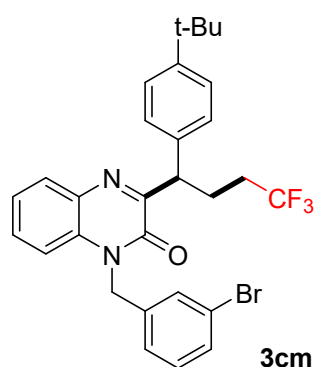

The product mixture was purified by silica gel column chromatography (PE/EtOAc = 10:1) to afford **3cm** (70.1 mg, 63%) as a white solid. Mp 157-159 °C;  $^1\text{H}$  NMR (400 MHz,  $\text{CDCl}_3$ )  $\delta$  7.84 (dd,  $J = 7.9, 1.6$  Hz, 1H), 7.31 – 7.14 (m, 8H), 7.03 – 6.90 (m, 3H), 5.35 (d,  $J = 15.8$  Hz, 1H), 5.09 (d,  $J = 15.8$  Hz, 1H), 4.62 (t,  $J = 7.8$  Hz, 1H), 2.49 – 2.26 (m, 2H), 2.14 – 1.90 (m, 2H), 1.17 (s, 9H);  $^{19}\text{F}$  NMR (377 MHz,  $\text{CDCl}_3$ )  $\delta$  -65.95 (t,  $J = 10.9$  Hz, 3F);  $^{13}\text{C}$  NMR (101 MHz,  $\text{CDCl}_3$ )  $\delta$  159.1, 153.3, 148.9, 136.5, 135.7, 131.8, 131.0, 129.8, 129.4, 129.0, 128.8, 127.1, 126.3 (q,  $J = 277.3$  Hz), 124.6, 124.4, 122.8, 121.9, 113.0, 44.7, 44.3, 33.4, 31.0 (q,  $J = 28.5$  Hz), 30.3, 25.0 (d,  $J = 3.0$  Hz); IR (thin film)  $\nu$  2965, 1647, 1601, 1256, 1099, 1002, 821, 759, 582  $\text{cm}^{-1}$ ; MS (ESI):  $m/z$  579.1  $[\text{M}+\text{Na}]^+$ ; HRMS (ESI-TOF):  $m/z$  Calculated for  $\text{C}_{29}\text{H}_{28}\text{BrF}_3\text{N}_2\text{ONa}$   $[\text{M}+\text{Na}]^+$ : 579.1229; Found: 579.1225.

**3-(1-(4-(*Tert*-butyl)phenyl)-4,4,4-trifluorobutyl)-1-(4-(trifluoromethyl)benzyl)quinoxalin-2(1*H*)-one (3cn)**

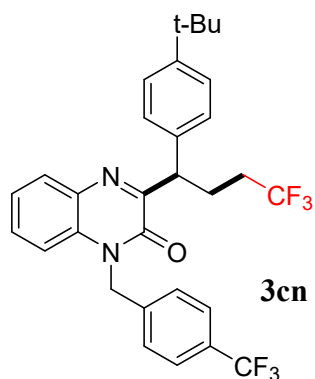

The product mixture was purified by silica gel column chromatography (PE/EtOAc = 10:1) to afford **3cn** (61.2 mg, 56%) as a white solid. Mp 166-168 °C; <sup>1</sup>H NMR (400 MHz, CDCl<sub>3</sub>) δ 7.87 (dd, *J* = 8.0, 1.7 Hz, 1H), 7.41 (d, *J* = 8.0 Hz, 2H), 7.33 – 7.09 (m, 8H), 7.01 (d, *J* = 8.3 Hz, 1H), 5.45 (d, *J* = 16.1 Hz, 1H), 5.22 (d, *J* = 16.0 Hz, 1H), 4.62 (t, *J* = 7.8 Hz, 1H), 2.53 – 2.22 (m, 2H), 2.12 – 1.87 (m, 2H), 1.18 (s, 9H); <sup>19</sup>F NMR (376 MHz, CDCl<sub>3</sub>) δ -62.63 (s, 3F), -66.02 (t, *J* = 10.8 Hz, 3F); <sup>13</sup>C NMR (101 MHz, CDCl<sub>3</sub>) δ 159.1, 153.3, 149.0, 138.2 (d, *J* = 1.5 Hz), 135.6, 131.8, 131.0, 129.5, 129.1 (d, *J* = 3.7 Hz), 128.8, 126.3 (q, *J* = 277.3 Hz), 126.1, 124.8 (q, *J* = 3.9 Hz), 124.6, 122.9, 122.8 (q, *J* = 273.1 Hz), 112.9, 44.7, 44.48, 33.4, 31.0 (q, *J* = 28.6 Hz), 30.3, 25.1 (d, *J* = 2.9 Hz); IR (thin film) ν 2965, 1649, 1603, 1325, 1256, 1119, 1098, 818, 756, 584 cm<sup>-1</sup>; MS (ESI): *m/z* 547.2 [M+H]<sup>+</sup>; HRMS (ESI-TOF): *m/z* Calculated for C<sub>30</sub>H<sub>29</sub>F<sub>6</sub>N<sub>2</sub>O [M+H]<sup>+</sup>: 547.2179; Found: 547.2170.

**3-(1-(4-(*Tert*-butyl)phenyl)-4,4,4-trifluorobutyl)-1-(3,5-dimethoxybenzyl)quinoxalin-2(1*H*)-one (3co)**

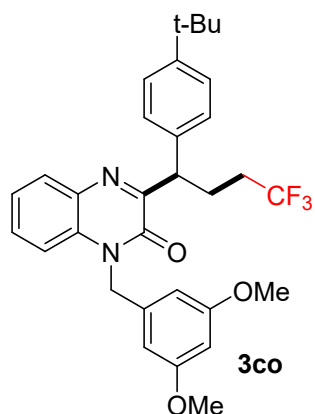

The product mixture was purified by silica gel column chromatography (PE/EtOAc = 10:1) to afford **3co** (57.3 mg, 53%) as a white solid. Mp 146-148 °C; <sup>1</sup>H NMR (400 MHz, CDCl<sub>3</sub>) δ 7.84 (dd, *J* = 8.0, 1.6 Hz, 1H), 7.29 – 7.25 (m, 3H), 7.23 – 7.18 (m, 3H), 7.14 – 7.08 (m, 1H), 6.24 – 6.08 (m, 3H), 5.23 (s, 2H), 4.63 (t, *J* = 7.8 Hz, 1H),

3.53 (s, 6H), 2.51 – 2.24 (m, 2H), 2.14 – 1.89 (m, 2H), 1.17 (s, 9H);  $^{19}\text{F}$  NMR (376 MHz,  $\text{CDCl}_3$ )  $\delta$  -65.99 (t,  $J = 10.8$  Hz, 3F);  $^{13}\text{C}$  NMR (101 MHz,  $\text{CDCl}_3$ )  $\delta$  160.1, 159.0, 153.4, 148.8, 136.5, 135.9, 131.8, 131.3, 129.2, 129.0, 127.0, 126.3 (q,  $J = 277.3$  Hz), 124.5, 122.6, 113.3, 103.7, 98.2, 54.1, 44.9, 44.7, 33.4, 31.1 (q,  $J = 28.6$  Hz), 30.3, 25.0 (d,  $J = 3.2$  Hz); IR (thin film)  $\nu$  2960, 1651, 1596, 1472, 1258, 1138, 960, 822, 753, 584  $\text{cm}^{-1}$ ; MS (ESI):  $m/z$  539.3  $[\text{M}+\text{H}]^+$ ; HRMS (ESI-TOF):  $m/z$  Calculated for  $\text{C}_{31}\text{H}_{34}\text{F}_3\text{N}_2\text{O}_3$   $[\text{M}+\text{H}]^+$ : 539.2516; Found: 539.2517.

**2-((3-(1-(4-(*Tert*-butyl)phenyl)-4,4,4-trifluorobutyl)-2-oxoquinoxalin-1(2*H*)-yl)methyl)-3-fluorobenzonitrile (3cp)**

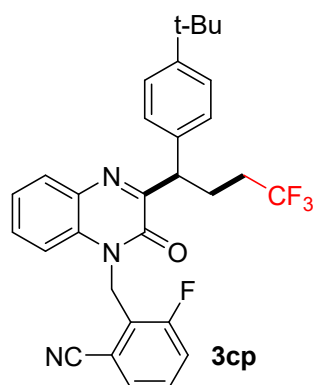

The product mixture was purified by silica gel column chromatography (PE/EtOAc = 10:1) to afford **3cp** (60.5 mg, 58%) as a yellow solid. Mp 184-186 °C;  $^1\text{H}$  NMR (400 MHz,  $\text{CDCl}_3$ )  $\delta$  7.92 (d,  $J = 7.8$  Hz, 1H), 7.65 – 7.61 (m, 1H), 7.37 (t,  $J = 7.8$  Hz, 1H), 7.31 – 7.22 (m, 5H), 6.99 – 6.90 (m, 2H), 6.41 (d,  $J = 8.8$  Hz, 1H), 5.59 (d,  $J = 16.8$  Hz, 1H), 5.44 (d,  $J = 16.8$  Hz, 1H), 4.62 (t,  $J = 7.8$  Hz, 1H), 2.55 – 2.26 (m, 2H), 2.16 – 1.96 (m, 2H), 1.19 (s, 9H);  $^{19}\text{F}$  NMR (377 MHz,  $\text{CDCl}_3$ )  $\delta$  -66.04 (td,  $J = 11.7, 3.8$  Hz, 3F), -100.58 (q,  $J = 8.1$  Hz, 1F);  $^{13}\text{C}$  NMR (101 MHz,  $\text{CDCl}_3$ )  $\delta$  164.4 (d,  $J = 258.6$  Hz), 159.1, 153.2, 149.1, 141.3 (d,  $J = 8.6$  Hz), 135.4, 134.6 (d,  $J = 9.7$  Hz), 131.8, 129.7, 129.5, 127.0, 126.3 (q,  $J = 277.3$  Hz), 124.7, 123.3, 115.2 (d,  $J = 14.1$  Hz), 114.9, 113.6 (d,  $J = 24.3$  Hz), 112.4, 106.1, 44.9, 42.9, 33.4, 31.0 (q,  $J = 28.4$  Hz), 30.3, 24.9 (d,  $J = 3.0$  Hz); IR (thin film)  $\nu$  2962, 1658, 1606, 1587, 1435, 1257, 1174, 1021, 824, 760, 582  $\text{cm}^{-1}$ ; MS (ESI):  $m/z$  522.2  $[\text{M}+\text{H}]^+$ ; HRMS (ESI-TOF):  $m/z$  Calculated for  $\text{C}_{30}\text{H}_{28}\text{F}_4\text{N}_3\text{O}$   $[\text{M}+\text{H}]^+$ : 522.2163; Found: 522.2177.

**3-(1-(4-(*Tert*-butyl)phenyl)-4,4,4-trifluorobutyl)-1,6,7-trimethylquinoxalin-2(1*H*)-one (3cq)**

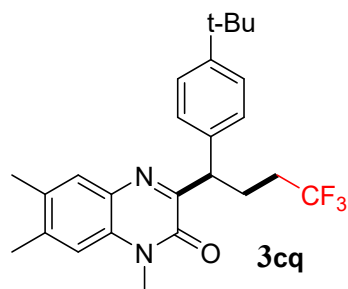

The product mixture was purified by silica gel column chromatography (PE/EtOAc = 10:1) to afford **3cq** (39.6 mg, 46%) as a white solid. Mp 160-162 °C; **<sup>1</sup>H NMR** (400 MHz, CDCl<sub>3</sub>) δ ppm 7.61 (s, 1H), 7.28 – 7.24 (m, 2H), 7.22 – 7.16 (m, 2H), 6.93 (s, 1H), 4.56 (t, *J* = 7.8 Hz, 1H), 3.50 (s, 3H), 2.44 – 2.37 (m, 1H), 2.31 (s, 3H), 2.28 (s, 3H), 2.26 – 2.20 (m, 1H), 2.12 – 1.87 (m, 2H), 1.18 (s, 9H); **<sup>19</sup>F NMR** (376 MHz, CDCl<sub>3</sub>) δ ppm -66.11 (t, *J* = 11.0 Hz, 3F); **<sup>13</sup>C NMR** (101 MHz, CDCl<sub>3</sub>) δ ppm 157.6, 153.4, 148.6, 138.7, 136.2, 131.4, 130.0, 129.9, 129.3, 127.0, 126.3 (q, *J* = 277.3 Hz), 124.5, 113.1, 44.5, 33.4, 31.1 (q, *J* = 28.5 Hz), 30.3, 28.0, 25.1 (d, *J* = 2.9 Hz), 19.5, 18.1; **IR** (thin film) ν 2964, 1643, 1620, 1258, 1136, 995, 793, 583 cm<sup>-1</sup>; **MS** (ESI): *m/z* 431.2 [M+H]<sup>+</sup>; **HRMS** (ESI-TOF): *m/z* Calculated for C<sub>25</sub>H<sub>30</sub>F<sub>3</sub>N<sub>2</sub>O [M+H]<sup>+</sup>: 431.2305; Found: 431.2302.

### 3-(1-(4-(*Tert*-butyl)phenyl)-4,4,4-trifluorobutyl)-6-chloro-1-methylquinoxalin-2(1*H*)-one (**3cr**)

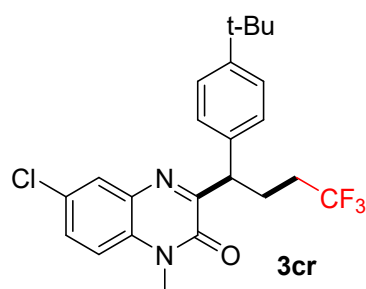

The product mixture was purified by silica gel column chromatography (PE/EtOAc = 10:1) to afford **3cr** (36.6 mg, 42%) as a white solid. Mp 136-138 °C; **<sup>1</sup>H NMR** (400 MHz, CDCl<sub>3</sub>) δ ppm 7.86 (d, *J* = 2.4 Hz, 1H), 7.40 (dd, *J* = 8.9, 2.5 Hz, 1H), 7.24 (q, *J* = 8.5 Hz, 4H), 7.10 (d, *J* = 8.9 Hz, 1H), 4.58 (t, *J* = 7.8 Hz, 1H), 3.52 (s, 3H), 2.45 – 2.18 (m, 2H), 2.12 – 1.84 (m, 2H), 1.19 (s, 9H); **<sup>19</sup>F NMR** (376 MHz, CDCl<sub>3</sub>) δ ppm -66.11 (t, *J* = 10.9 Hz, 3F); **<sup>13</sup>C NMR** (101 MHz, CDCl<sub>3</sub>) δ ppm 160.4, 153.0, 149.0, 135.4, 132.1, 130.7, 128.9, 128.5, 127.9, 127.1, 126.2 (q, *J* = 277.3 Hz), 124.6, 113.7, 44.7, 33.4, 31.0 (q, *J* = 28.6 Hz), 30.3, 28.3, 25.0 (d, *J* = 3.0 Hz); **IR** (thin film) ν 2962, 1655, 1256, 1216, 1145, 1099, 1004, 823, 797, 591 cm<sup>-1</sup>; **MS** (ESI): *m/z* 437.2

[M+H]<sup>+</sup>; **HRMS** (ESI-TOF): *m/z* Calculated for C<sub>23</sub>H<sub>25</sub>ClF<sub>3</sub>N<sub>2</sub>O [M+H]<sup>+</sup>: 437.1602; Found: 437.1613.

### 3-(4, 4-Difluoro-1-phenylbutyl)-1-methylquinoxalin-2(1H)-one (4aa)

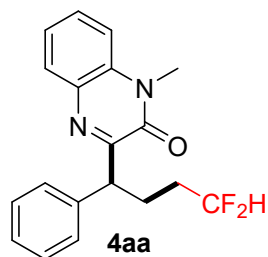

The product mixture was purified by silica gel column chromatography (PE/EtOAc = 10:1) to afford **4aa** (39.4 mg, 60%) as a yellow solid. Mp 123-125 °C; <sup>1</sup>H NMR (400 MHz, CDCl<sub>3</sub>) δ 7.83 (dd, *J* = 7.9, 1.5 Hz, 1H), 7.43 – 7.36 (m, 1H), 7.37 – 7.32 (m, 2H), 7.28 – 7.06 (m, 6H), 5.73 (tt, *J* = 56.9, 4.5 Hz, 1H), 4.59 (t, *J* = 7.8 Hz, 1H), 3.50 (s, 3H), 2.39 – 2.27 (m, 1H), 2.22 – 2.13 (m, 1H), 1.88 – 1.62 (m, 2H); <sup>19</sup>F NMR (376 MHz, CDCl<sub>3</sub>) δ -115.59 (dt, *J* = 56.9, 17.6 Hz, 2F); <sup>13</sup>C NMR (101 MHz, CDCl<sub>3</sub>) δ 160.2, 154.4, 140.6, 133.0, 132.6, 130.2, 130.0, 128.6 (d, *J* = 4.1 Hz), 127.0, 123.6, 117.4 (t, *J* = 239.0 Hz), 113.6, 46.67, 32.4 (t, *J* = 21.0 Hz), 29.2, 26.4 (t, *J* = 5.5 Hz); **IR** (thin film) ν 2925, 1651, 1602, 1472, 1122, 957, 753, 701, 571 cm<sup>-1</sup>; **MS** (ESI): *m/z* 329.1 [M+H]<sup>+</sup>; **HRMS** (ESI-TOF): *m/z* Calculated for C<sub>19</sub>H<sub>19</sub>F<sub>2</sub>N<sub>2</sub>O [M+H]<sup>+</sup>: 329.1460; Found: 329.1458.

### 3-(4, 4-Difluoro-1-(4-methoxyphenyl)butyl)-1-methylquinoxalin-2(1H)-one (4da)

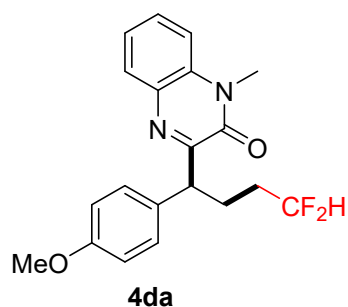

The product mixture was purified by silica gel column chromatography (PE/EtOAc = 10:1) to afford **4da** (53.0 mg, 74%) as a brown liquid. <sup>1</sup>H NMR (400 MHz, CDCl<sub>3</sub>) δ 7.91 (dd, *J* = 8.0, 1.5 Hz, 1H), 7.52 – 7.47 (m, 1H), 7.42 – 7.28 (m, 3H), 7.23 (dd, *J* = 9.7, 1.5 Hz, 1H), 6.91 – 6.72 (m, 2H), 5.82 (tt, *J* = 56.9, 4.5 Hz, 1H), 4.62 (dd, *J* = 8.5, 7.2 Hz, 1H), 3.73 (s, 3H), 3.59 (s, 3H), 2.39 – 2.34 (m, 1H), 2.27 – 2.23 (m, 1H), 1.93 – 1.71 (m, 2H); <sup>19</sup>F NMR (376 MHz, CDCl<sub>3</sub>) δ -115.53 (dt, *J* = 56.9, 17.6 Hz, 2F);

$^{13}\text{C}$  NMR (101 MHz,  $\text{CDCl}_3$ )  $\delta$  160.4, 158.6, 154.4, 133.0, 132.6, 132.5, 130.0 (d,  $J = 19.5$  Hz), 129.6, 127.0, 123.6, 117.4 (t,  $J = 238.9$  Hz), 114.0, 113.6, 55.2, 45.8, 32.4 (t,  $J = 20.9$  Hz), 29.1, 26.4 (t,  $J = 5.5$  Hz); **IR** (thin film)  $\nu$  2928, 1651, 1602, 1508, 1471, 1246, 1034, 832, 752, 576  $\text{cm}^{-1}$ ; **MS** (ESI):  $m/z$  359.2  $[\text{M}+\text{H}]^+$ ; **HRMS** (ESI-TOF):  $m/z$  Calculated for  $\text{C}_{20}\text{H}_{21}\text{F}_2\text{N}_2\text{O}_2$   $[\text{M}+\text{H}]^+$ : 359.1566; Found: 359.1563.

### 3-(4, 4-Difluoro-1-(4-fluorophenyl)butyl)-1-methylquinoxalin-2(1H)-one (4fa)

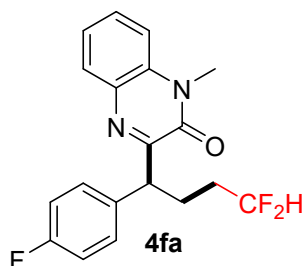

The product mixture was purified by silica gel column chromatography (PE/EtOAc = 10:1) to afford **4fa** (49.8 mg, 72%) as a brown liquid.  $^1\text{H}$  NMR (400 MHz,  $\text{CDCl}_3$ )  $\delta$  7.91 (d,  $J = 7.9$  Hz, 1H), 7.52 (t,  $J = 7.9$  Hz, 1H), 7.43 – 7.38 (m, 2H), 7.35 (t,  $J = 7.7$  Hz, 1H), 7.25 (d,  $J = 7.1$  Hz, 1H), 6.96 (t,  $J = 8.2$  Hz, 2H), 6.05 – 5.50 (m, 1H), 4.67 (t,  $J = 7.8$  Hz, 1H), 3.61 (s, 3H), 2.41 (tt,  $J = 12.7, 6.0$  Hz, 1H), 2.28 – 2.18 (m, 1H), 1.96 – 1.66 (m, 2H);  $^{19}\text{F}$  NMR (377 MHz,  $\text{CDCl}_3$ )  $\delta$  -115.62 (dt,  $J = 56.9, 17.5$  Hz, 2F), -115.82 (m, 1F);  $^{13}\text{C}$  NMR (101 MHz,  $\text{CDCl}_3$ )  $\delta$  161.9 (d,  $J = 245.2$  Hz), 160.0, 154.4, 136.3 (d,  $J = 3.2$  Hz), 133.0, 132.6, 130.2 – 130.0 (m), 123.7, 117.3 (t,  $J = 239.0$  Hz), 115.5, 115.3, 113.6, 45.9, 32.3 (t,  $J = 21.0$  Hz), 29.2, 26.4 (t,  $J = 5.5$  Hz); **IR** (thin film)  $\nu$  2923, 1650, 1602, 1472, 1221, 1122, 834, 752, 734, 527  $\text{cm}^{-1}$ ; **MS** (ESI):  $m/z$  347.1  $[\text{M}+\text{H}]^+$ ; **HRMS** (ESI-TOF):  $m/z$  Calculated for  $\text{C}_{19}\text{H}_{18}\text{F}_3\text{N}_2\text{O}$   $[\text{M}+\text{H}]^+$ : 347.1366; Found: 347.1364.

### 3-(1-(4-(Tert-butyl)phenyl)-4,4-difluorobutyl)-1-methylquinoxalin-2(1H)-one (4ca)

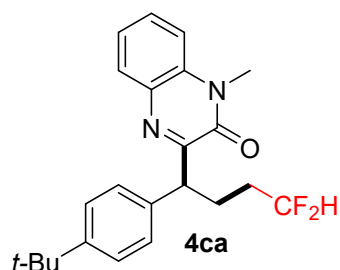

The product mixture was purified by silica gel column chromatography (PE/EtOAc = 10:1) to afford **4ca** (46.9 mg, 61%) as a brown liquid.  $^1\text{H}$  NMR (400 MHz,  $\text{CDCl}_3$ )  $\delta$  7.82 (dd,  $J = 8.0, 1.5$  Hz, 1H), 7.42 – 7.35 (m, 1H), 7.30 – 7.18 (m, 5H), 7.15 – 7.09

(m, 1H), 5.73 (tt,  $J = 56.9, 4.5$  Hz, 1H), 4.58 (t,  $J = 7.8$  Hz, 1H), 3.50 (s, 3H), 2.37 – 2.25 (m, 1H), 2.23 – 2.10 (m, 1H), 1.84 – 1.62 (m, 2H), 1.17 (s, 9H);  $^{19}\text{F}$  NMR (376 MHz,  $\text{CDCl}_3$ )  $\delta$  -115.51 (dt,  $J = 56.9, 17.6$  Hz, 2F);  $^{13}\text{C}$  NMR (101 MHz,  $\text{CDCl}_3$ )  $\delta$  160.4, 154.5, 149.7, 137.4, 133.0, 132.7, 130.1, 129.9, 128.2, 125.5, 123.5, 117.4 (t,  $J = 239.0$  Hz), 113.5, 46.1, 34.4, 32.4 (t,  $J = 20.9$  Hz), 31.4, 29.1, 26.4 (t,  $J = 5.5$  Hz); IR (thin film)  $\nu$  2962, 1655, 1603, 1471, 1122, 1025, 931, 831, 756, 584  $\text{cm}^{-1}$ ; MS (ESI):  $m/z$  385.2  $[\text{M}+\text{H}]^+$ ; HRMS (ESI-TOF):  $m/z$  Calculated for  $\text{C}_{23}\text{H}_{27}\text{F}_2\text{N}_2\text{O}$   $[\text{M}+\text{H}]^+$ : 385.2086; Found: 385.2085.

### 3-(1-(4-(*Tert*-butyl)phenyl)-4,4-difluorobutyl)-1-hexylquinoxalin-2(1*H*)-one (4cb)

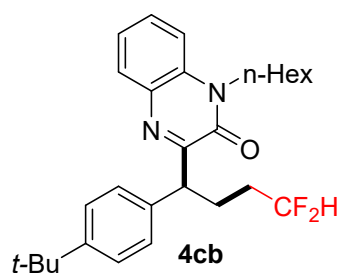

The product mixture was purified by silica gel column chromatography (PE/EtOAc = 10:1) to afford **4cb** (49.1 mg, 54%) as a white solid. Mp 130-132 °C;  $^1\text{H}$  NMR (400 MHz,  $\text{CDCl}_3$ )  $\delta$  7.92 (d,  $J = 7.9$  Hz, 1H), 7.49 (t,  $J = 8.1$  Hz, 1H), 7.37 – 7.23 (m, 6H), 6.19 – 5.42 (m, 1H), 4.67 (t,  $J = 7.8$  Hz, 1H), 4.23 (dt,  $J = 15.1, 7.9$  Hz, 1H), 4.07 (dt,  $J = 14.2, 7.8$  Hz, 1H), 2.40 (tt,  $J = 12.6, 6.3$  Hz, 1H), 2.29 – 2.24 (m, 1H), 1.89 – 1.75 (m, 2H), 1.67 (dd,  $J = 15.7, 8.0$  Hz, 3H), 1.43 – 1.28 (m, 5H), 1.26 (s, 9H), 0.91 – 0.79 (m, 3H);  $^{19}\text{F}$  NMR (377 MHz,  $\text{CDCl}_3$ )  $\delta$  -115.52 (dt,  $J = 57.0, 17.5$  Hz, 2F);  $^{13}\text{C}$  NMR (101 MHz,  $\text{CDCl}_3$ )  $\delta$  160.5, 154.2, 149.6, 137.5, 132.9, 132.2, 130.4, 129.8, 128.1, 125.5, 123.3, 117.4 (t,  $J = 239.0$  Hz), 113.5, 45.9, 42.5, 34.4, 32.5 (t,  $J = 20.9$  Hz), 31.4, 31.3, 27.2, 26.7, 26.5 (t,  $J = 5.4$  Hz), 22.6, 13.9; IR (thin film)  $\nu$  2960, 1650, 1603, 1468, 1121, 1023, 757, 587, 443  $\text{cm}^{-1}$ ; MS (ESI):  $m/z$  455.3  $[\text{M}+\text{H}]^+$ ; HRMS (ESI-TOF):  $m/z$  Calculated for  $\text{C}_{28}\text{H}_{37}\text{F}_2\text{N}_2\text{O}$   $[\text{M}+\text{H}]^+$ : 455.2868; Found: 455.2867.

### Ethyl 2-(3-(1-(4-(*tert*-butyl)phenyl)-4,4-difluorobutyl)-2-oxoquinoxalin-1(2*H*)-yl)acetate (4cc)

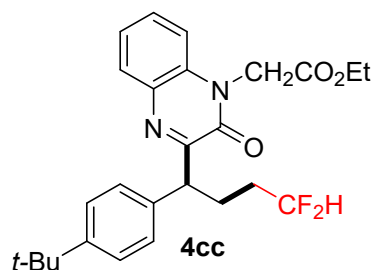

The product mixture was purified by silica gel column chromatography (PE/EtOAc = 10:1) to afford **4cc** (48.4 mg, 53%) as a brown liquid.  $^1\text{H NMR}$  (400 MHz,  $\text{CDCl}_3$ )  $\delta$  7.86 (dd,  $J = 8.0, 1.6$  Hz, 1H), 7.46 (t,  $J = 7.7$  Hz, 1H), 7.30 – 7.23 (m, 3H), 7.23 – 7.18 (m, 2H), 6.94 (dd,  $J = 8.4, 1.2$  Hz, 1H), 5.74 (tt,  $J = 56.9, 4.5$  Hz, 1H), 4.97 (d,  $J = 17.3$  Hz, 1H), 4.73 (d,  $J = 17.3$  Hz, 1H), 4.56 (dd,  $J = 8.4, 7.2$  Hz, 1H), 4.20 – 3.98 (m, 2H), 2.45 – 2.36 (m, 1H), 2.31 – 2.22 (m, 1H), 1.87 – 1.63 (m, 2H), 1.18 (s, 9H), 1.11 (t,  $J = 7.1$  Hz, 3H);  $^{19}\text{F NMR}$  (376 MHz,  $\text{CDCl}_3$ )  $\delta$  -115.58 (dt,  $J = 56.9, 17.5$  Hz, 2F);  $^{13}\text{C NMR}$  (101 MHz,  $\text{CDCl}_3$ )  $\delta$  167.1, 160.3, 154.1, 149.7, 137.1, 132.7, 132.2, 130.5, 130.1, 128.2, 125.5, 123.9, 117.4 (t,  $J = 239.0$  Hz), 113.0, 62.0, 46.2, 43.6, 34.4, 32.4 (t,  $J = 21.0$  Hz), 31.4, 26.4 (t,  $J = 5.5$  Hz), 14.1; **IR** (thin film)  $\nu$  2963, 1749, 1658, 1604, 1469, 1203, 1121, 755, 582  $\text{cm}^{-1}$ ; **MS** (ESI):  $m/z$  457.2  $[\text{M}+\text{H}]^+$ ; **HRMS** (ESI-TOF):  $m/z$  Calculated for  $\text{C}_{26}\text{H}_{31}\text{F}_2\text{N}_2\text{O}_3$   $[\text{M}+\text{H}]^+$ : 457.2297; Found: 457.2298.

#### 1-Benzyl-3-(1-(4-(*tert*-butyl)phenyl)-4,4-difluorobutyl)quinoxalin-2(1H)-one (**4ce**)

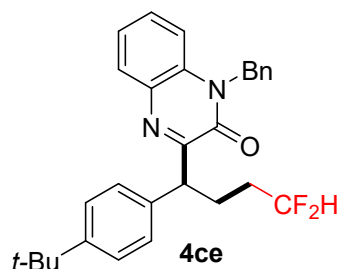

The product mixture was purified by silica gel column chromatography (PE/EtOAc = 15:1) to afford **4ce** (58.9 mg, 64%) as a yellow solid. Mp 137-139  $^{\circ}\text{C}$ ;  $^1\text{H NMR}$  (400 MHz,  $\text{CDCl}_3$ )  $\delta$  7.92 (d,  $J = 7.8$  Hz, 1H), 7.42 – 7.33 (m, 3H), 7.32 – 7.15 (m, 8H), 7.12 (d,  $J = 7.3$  Hz, 2H), 6.02 – 5.65 (m, 1H), 5.52 (d,  $J = 15.7$  Hz, 1H), 5.25 (d,  $J = 15.7$  Hz, 1H), 4.73 (t,  $J = 7.8$  Hz, 1H), 2.48 – 2.39 (m, 1H), 2.35 – 2.25 (m, 1H), 1.95 – 1.27 (m, 2H), 1.27 (s, 9H);  $^{19}\text{F NMR}$  (377 MHz,  $\text{CDCl}_3$ )  $\delta$  -115.45 (dt,  $J = 56.9, 17.8$  Hz, 2F);  $^{13}\text{C NMR}$  (101 MHz,  $\text{CDCl}_3$ )  $\delta$  160.7, 154.6, 149.8, 137.4, 135.3, 132.9, 132.4, 130.3, 129.9, 128.9, 128.2, 127.7, 126.9, 125.5, 123.6, 117.5 (t,  $J = 239.0$  Hz), 114.3, 46.1 (d,  $J = 20.6$  Hz), 34.5, 32.5 (t,  $J = 20.9$  Hz), 31.4, 26.4 (t,  $J = 5.4$  Hz); **IR** (thin film)  $\nu$  2964, 1654, 1603, 1455, 1122, 909, 733, 583, 421  $\text{cm}^{-1}$ ; **MS** (ESI):  $m/z$



461.2 [M+H]<sup>+</sup>; **HRMS** (ESI-TOF): *m/z* Calculated for C<sub>29</sub>H<sub>31</sub>F<sub>2</sub>N<sub>2</sub>O [M+H]<sup>+</sup>: 461.2399; Found: 461.2401.

**2-((3-(1-(4-(*Tert*-butyl)phenyl)-4,4-difluorobutyl)-2-oxoquinoxalin-1(2*H*)-yl)methyl)-3-fluorobenzonitrile (4cp)**

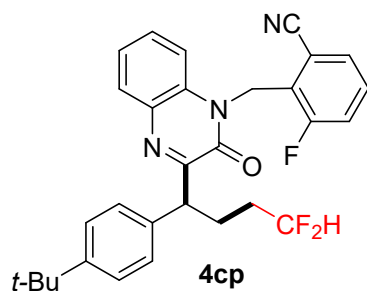

The product mixture was purified by silica gel column chromatography (PE/EtOAc = 10:1) to afford **4cp** (49.1 mg, 48%) as a white solid. Mp 176-178 °C; **<sup>1</sup>H NMR** (400 MHz, CDCl<sub>3</sub>) δ 7.99 (d, *J* = 7.9 Hz, 1H), 7.71 (dd, *J* = 8.7, 5.3 Hz, 1H), 7.43 (t, *J* = 7.8 Hz, 1H), 7.38 – 7.25 (m, 5H), 7.15 – 6.91 (m, 2H), 6.57 – 6.36 (m, 1H), 5.85 (tt, *J* = 56.7, 4.5 Hz, 1H), 5.66 (d, *J* = 16.8 Hz, 1H), 5.52 (d, *J* = 16.8 Hz, 1H), 4.70 (t, *J* = 7.8 Hz, 1H), 2.46 (tt, *J* = 12.4, 6.3 Hz, 1H), 2.36 – 2.27 (m, 1H), 1.99 – 1.79 (m, 2H), 1.27 (s, 9H); **<sup>19</sup>F NMR** (377 MHz, CDCl<sub>3</sub>) δ -100.59 (td, *J* = 8.4, 5.6 Hz, 2F), -115.52 (dt, *J* = 56.9, 17.6 Hz, 1F); **<sup>13</sup>C NMR** (101 MHz, CDCl<sub>3</sub>) δ 165.4 (d, *J* = 258.3 Hz), 160.6, 154.3, 149.9, 142.4 (d, *J* = 8.6 Hz), 136.9, 135.6 (d, *J* = 9.5 Hz), 132.9, 131.6, 130.7, 130.4, 128.1, 125.6, 124.3, 117.4 (t, *J* = 239.0 Hz), 116.4 – 115.8 (m), 114.7 (d, *J* = 24.3 Hz), 113.5, 107.1 (d, *J* = 3.6 Hz), 46.4, 43.9, 34.4, 32.4 (t, *J* = 20.9 Hz), 31.3, 26.2 (t, *J* = 5.4 Hz); **IR** (thin film) ν 2963, 2228, 1658, 1606, 1123, 932, 831, 758, 586 cm<sup>-1</sup>; **MS** (ESI): *m/z* 504.2 [M+H]<sup>+</sup>; **HRMS** (ESI-TOF): *m/z* Calculated for C<sub>30</sub>H<sub>29</sub>F<sub>3</sub>N<sub>3</sub>O [M+H]<sup>+</sup>: 504.2257; Found: 504.2258.

## 4. Control Experiments

### Radical Inhibition Experiments

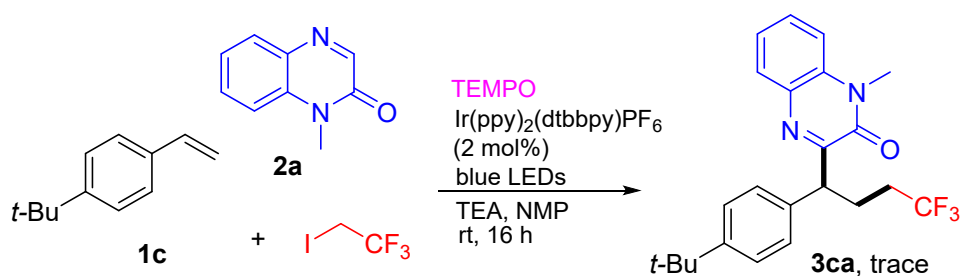

To a sealed tube equipped with a stir bar were added **2a** (0.2 mmol, 1.0 equiv),  $\text{Ir}(\text{ppy})_2(\text{dtbbpy})\text{PF}_6$  (3.7 mg, 0.004 mmol, 2 mol %) and TEMPO (125.0mg, 0.8 mmol, 4.0 equiv). The tube was evacuated and backfilled with pure  $\text{N}_2$  for three times. Afterwards, NMP (0.5 mL), 4-*tert*-Butylstyrene **1c** (2.5 equiv, 0.5 mmol),  $\text{ICH}_2\text{CF}_3$  (2.0 equiv, 0.4 mmol) and TEA (3.0 equiv, 0.6 mmol) were added by syringe under  $\text{N}_2$  atmosphere. The tightly sealed tube was then irradiated with a 20 W blue LEDs (the distance between the tube and the light source was about 7 cm) and simultaneously cooled by a fan to keep the reaction temperature at 25 °C. After 16 hours, the mixture was transferred into a 125 mL separating funnel which contained 20 mL  $\text{H}_2\text{O}$ . The mixture was extracted with DCM (20 mL each) for three times and the combined organic layer was washed with brine (20 mL) once and dried by  $\text{Na}_2\text{SO}_4$ . After filtration, the filtrate was concentrated under reduced pressure to give the crude product. The  $^{19}\text{F}$  NMR spectroscopy of the crude product indicated that only trace of product **3ca** was formed.

### Radical Clock Experiments

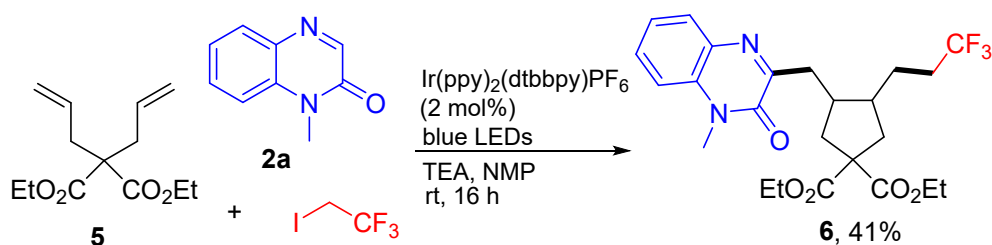

To a sealed tube equipped with a stir bar were added **2a** (0.2 mmol, 1.0 equiv),  $\text{Ir}(\text{ppy})_2(\text{dtbbpy})\text{PF}_6$  (3.7 mg, 0.004 mmol, 2 mol %). The tube was evacuated and backfilled with pure  $\text{N}_2$  for three times. Afterwards, NMP (0.5 mL), Diethyl 2,2-Diallylmalonate **5** (2.5 equiv, 0.5 mmol),  $\text{ICH}_2\text{CF}_3$  (2.0 equiv, 0.4 mmol) and TEA

(3.0 equiv, 0.6 mmol) were added by syringe under N<sub>2</sub> atmosphere. The tightly sealed tube was then irradiated with a 20 W blue LEDs (the distance between the tube and the light source was about 7 cm) and simultaneously cooled by a fan to keep the reaction temperature at 25 °C. After 16 hours, the mixture was transferred into a 125 mL separating funnel which contained 20 mL H<sub>2</sub>O. The mixture was extracted with DCM (20 mL each) for three times and the combined organic layer was washed with brine (20 mL) once and dried by Na<sub>2</sub>SO<sub>4</sub>. After filtration, the filtrate was concentrated under reduced pressure to give the crude product, which was purified by flash chromatography on silica gel (PE/EtOAc = 10: 1) to give the product **6** (39.6 mg, 41%) as a brown liquid. <sup>1</sup>H NMR (400 MHz, CDCl<sub>3</sub>) δ 7.72 (d, *J* = 7.8 Hz, 1H), 7.45 (t, *J* = 7.7 Hz, 1H), 7.24 (dd, *J* = 16.0, 8.0 Hz, 2H), 4.11 (s, 4H), 3.61 (s, 3H), 3.01 – 2.85 (m, 1H), 2.83 – 2.63 (m, 2H), 2.41 (dd, *J* = 14.0, 6.4 Hz, 1H), 2.28 (dd, *J* = 10.8, 6.1 Hz, 1H), 2.18 – 2.00 (m, 5H), 1.80 – 1.60 (m, 1H), 1.52 – 1.36 (m, 1H), 1.16 (q, *J* = 7.2 Hz, 6H); <sup>19</sup>F NMR (377 MHz, CDCl<sub>3</sub>) δ -66.34 (t, *J* = 10.9 Hz); <sup>13</sup>C NMR (101 MHz, CDCl<sub>3</sub>) δ 172.5 (d, *J* = 10.5 Hz), 159.4, 154.8, 133.0, 132.6, 129.8, 127.2 (q, *J* = 276.4 Hz), 123.5, 113.6, 61.6, 61.5, 58.7, 41.3, 39.0, 38.4, 38.1, 33.1, 32.5 (q, *J* = 28.5 Hz), 29.0, 21.5 (d, *J* = 2.9 Hz), 14.0; IR (thin film) ν 2981, 1726, 1652, 1602, 1473, 1250, 1035, 860, 754, 561, 459 cm<sup>-1</sup>; MS (ESI): *m/z* 483 [M+H]<sup>+</sup>; HRMS (ESI-TOF): *m/z* Calculated for C<sub>24</sub>H<sub>30</sub>F<sub>3</sub>N<sub>2</sub>O<sub>5</sub> [M+H]<sup>+</sup>: 483.2101; Found: 483.2103.

#### Two-Component reaction of **1a** and ICH<sub>2</sub>CF<sub>3</sub>

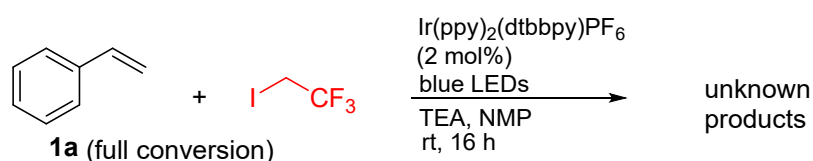

To a sealed tube equipped with a stir bar was added Ir(ppy)<sub>2</sub>(dtbbpy)PF<sub>6</sub> (3.7 mg, 0.004 mmol, 2 mol %). The tube was evacuated and backfilled with pure N<sub>2</sub> for three times. Afterwards, NMP (0.5 mL), styrene **1a** (2.5 equiv, 0.5 mmol), ICH<sub>2</sub>CF<sub>3</sub> (2.0 equiv, 0.4 mmol) and TEA (3.0 equiv, 0.6 mmol) were added by syringe under N<sub>2</sub> atmosphere. The tightly sealed tube was then irradiated with a 20 W blue LEDs (the distance between the tube and the light source was about 7 cm) and simultaneously cooled by a fan to keep the reaction temperature at 25 °C. After 16 hours, the mixture was transferred into a 125 mL separating funnel which contained 20 mL H<sub>2</sub>O. The mixture was extracted with DCM (20 mL each) for three times and the combined organic layer was washed with brine (20 mL) once and dried by Na<sub>2</sub>SO<sub>4</sub>. After

filtration, the filtrate was concentrated under reduced pressure to give the crude product. Styrene **1a** was completely converted to unknown products.

$^1\text{H NMR}$  (400 MHz,  $\text{CDCl}_3$ )

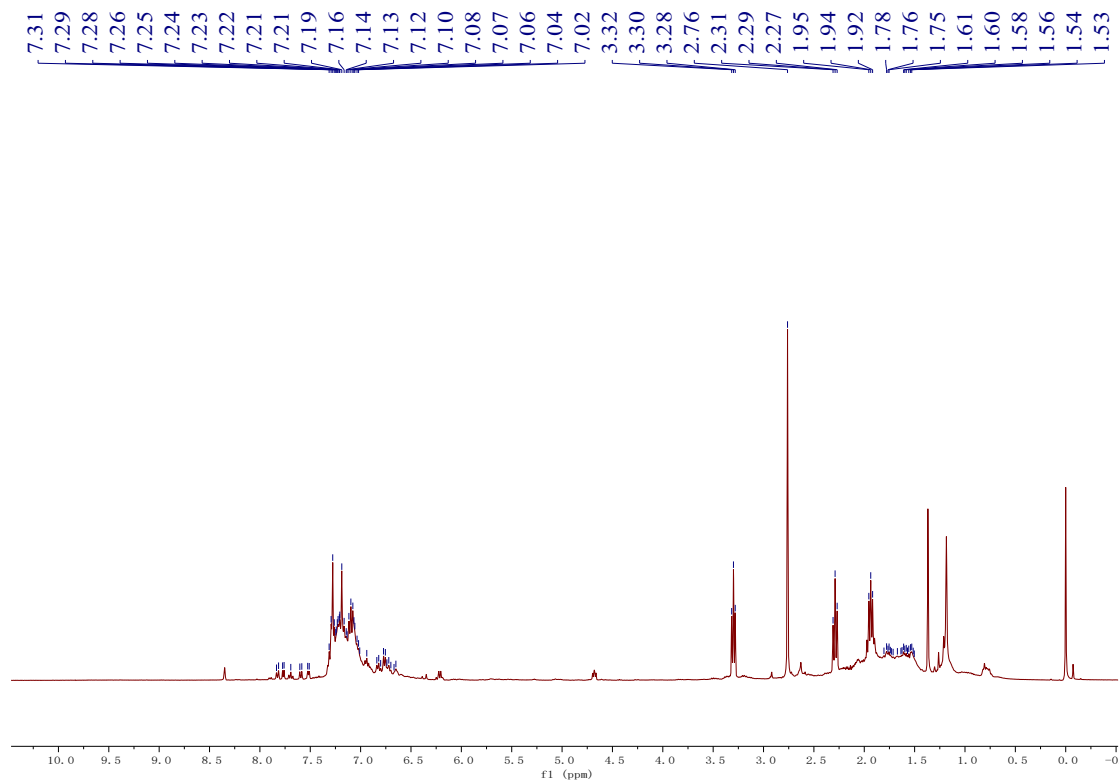

$^{19}\text{F NMR}$  (377 MHz,  $\text{CDCl}_3$ )

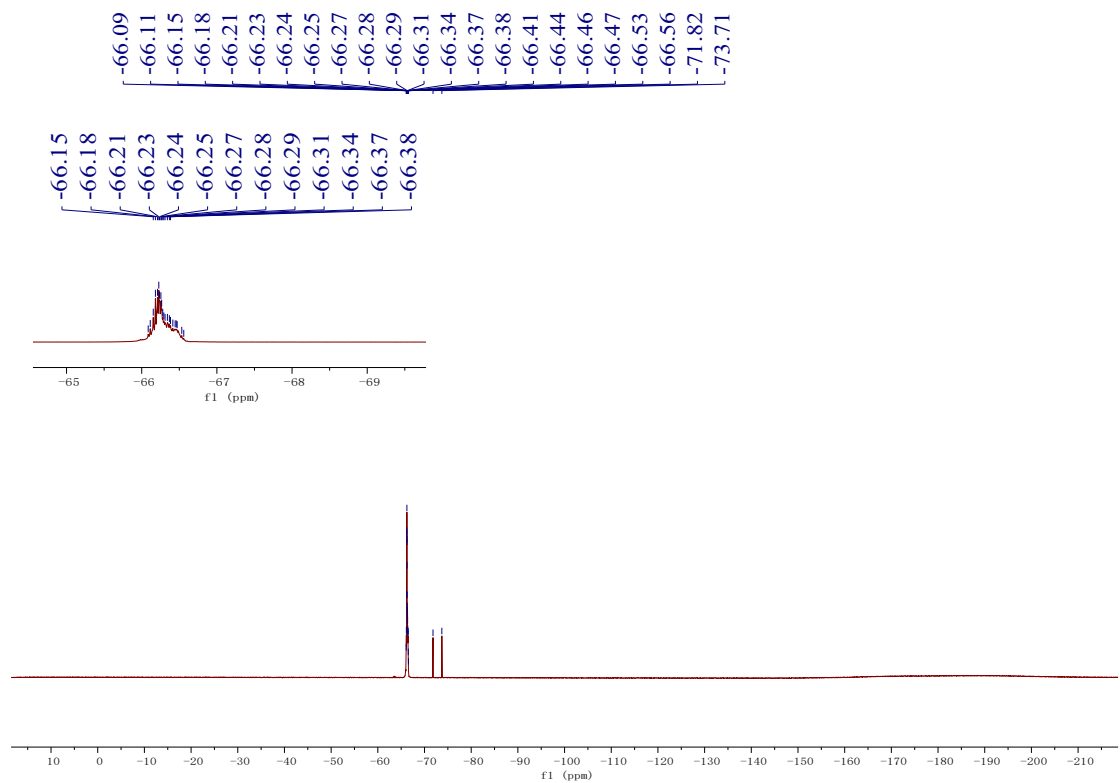

Two-Component reaction of **2a** and ICH<sub>2</sub>CF<sub>3</sub>

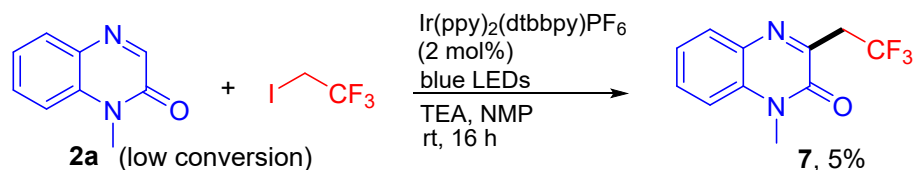

To a sealed tube equipped with a stir bar were added **2a** (0.2 mmol, 1.0 equiv) and Ir(ppy)<sub>2</sub>(dtbbpy)PF<sub>6</sub> (3.7 mg, 0.004 mmol, 2 mol %). The tube was evacuated and backfilled with pure N<sub>2</sub> for three times. Afterwards, NMP (0.5 mL), ICH<sub>2</sub>CF<sub>3</sub> (3.0 equiv, 0.6 mmol) and TEA (3.0 equiv, 0.6 mmol) were added by syringe under N<sub>2</sub> atmosphere. The tightly sealed tube was then irradiated with a 20 W blue LEDs (the distance between the tube and the light source was about 7 cm) and simultaneously cooled by a fan to keep the reaction temperature at 25 °C. After 16 hours, the reaction mixture was monitored by TLC, <sup>19</sup>F NMR, and GC-MS. The TLC indicated that most of **2a** was not converted, whereas <sup>19</sup>F NMR<sup>8</sup> and GC-MS showed that trace of product **7** was formed.

<sup>19</sup>F NMR (377 MHz, CDCl<sub>3</sub>)

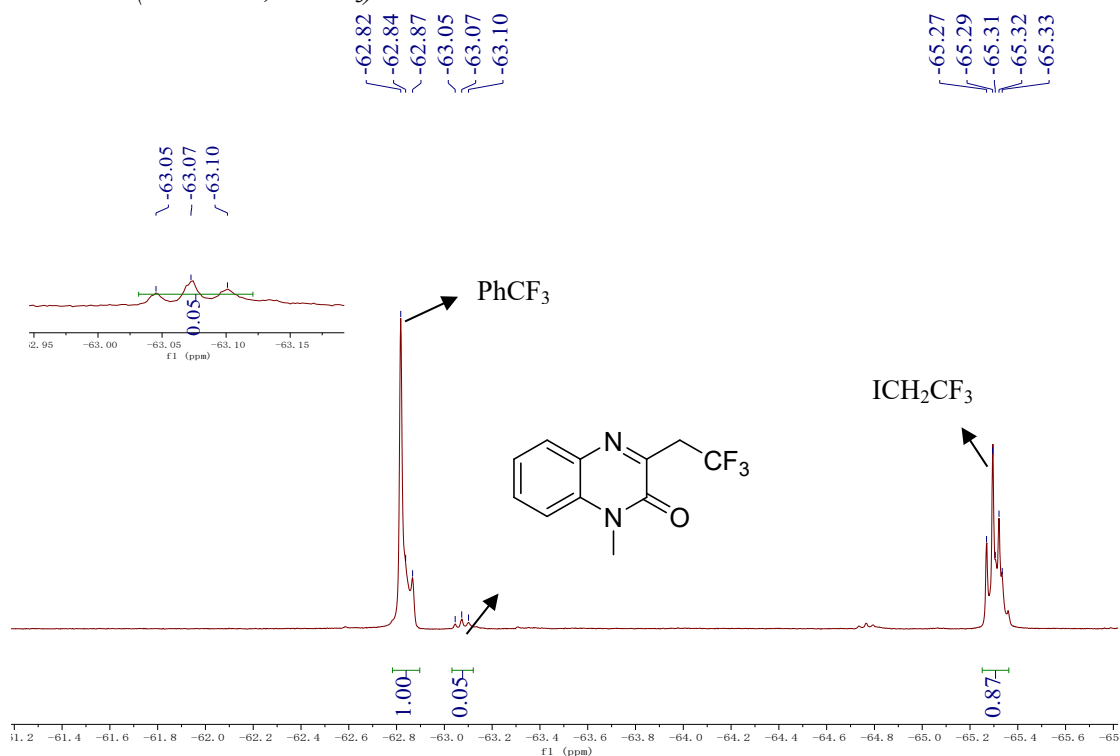

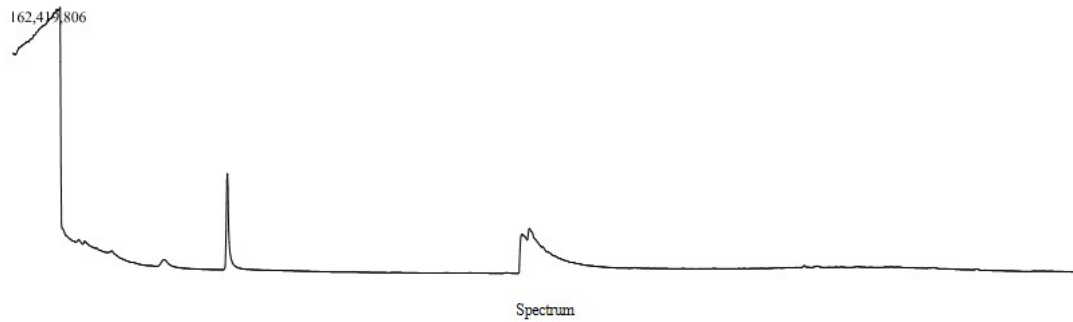

ine#:1 R.Time:8.830(Scan#:1167)  
 MassPeaks:465  
 acqMode:Single 8.830(1167) BasePeak:160(3518791)  
 :G Mode:None Group 1 - Event 1 Scan

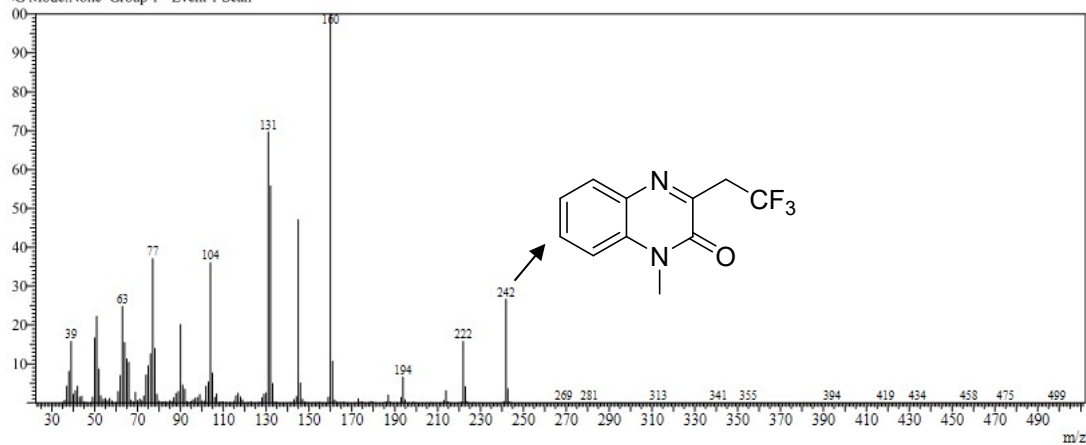

## 5. ORTEP Drawing of the X-Ray Crystallographic Structure of Product 3aa

The crystals were obtained from a solution of Toluene slow volatilization. The X-ray intensity data were measured at 213(2) K

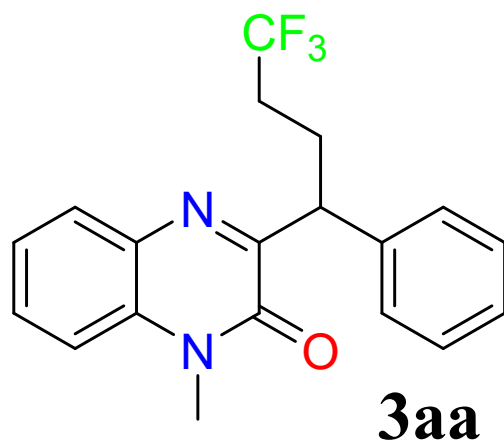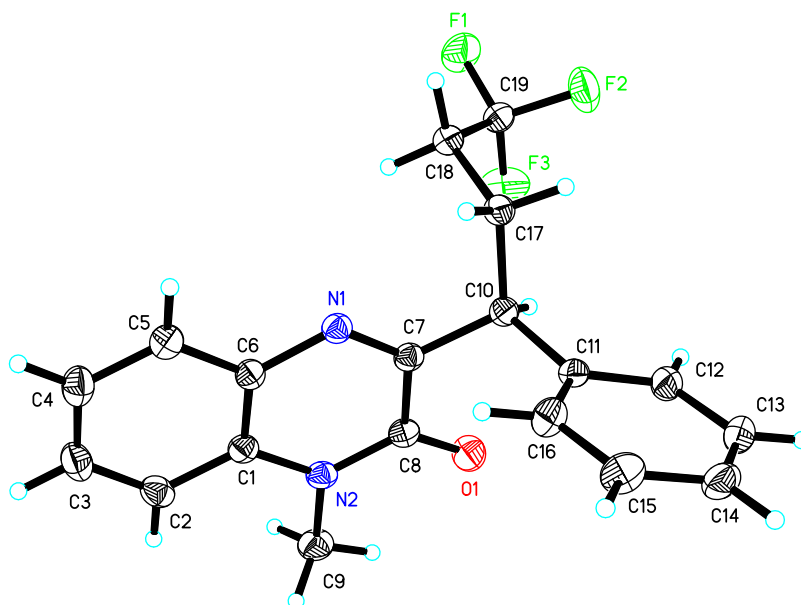

The crystal structure has been deposited at the Cambridge Crystallographic Data Center and allocated the deposition number CCDC 2100730

This data can be obtained free of charge from the Cambridge Crystallographic Data Center via [www.ccdc.cam.ac.uk/data\\_request/cif](http://www.ccdc.cam.ac.uk/data_request/cif)

## Crystal data and structure refinement for 3aa

|                                   |                                                                 |                    |
|-----------------------------------|-----------------------------------------------------------------|--------------------|
| Identification code               | <b>3aa</b>                                                      |                    |
| Empirical formula                 | C <sub>19</sub> H <sub>17</sub> F <sub>3</sub> N <sub>2</sub> O |                    |
| Formula weight                    | 346.34                                                          |                    |
| Temperature                       | 213(2) K                                                        |                    |
| Wavelength                        | 0.71073 Å                                                       |                    |
| Crystal system                    | Monoclinic                                                      |                    |
| Space group                       | P 21/n                                                          |                    |
| Unit cell dimensions              | a = 11.9256(4) Å                                                | a = 90°.           |
|                                   | b = 11.4661(4) Å                                                | b = 108.6160(10)°. |
|                                   | c = 12.6607(4) Å                                                | g = 90°.           |
| Volume                            | 1640.65(10) Å <sup>3</sup>                                      |                    |
| Z                                 | 4                                                               |                    |
| Density (calculated)              | 1.402 Mg/m <sup>3</sup>                                         |                    |
| Absorption coefficient            | 0.111 mm <sup>-1</sup>                                          |                    |
| F(000)                            | 720                                                             |                    |
| Crystal size                      | 0.190 x 0.150 x 0.110 mm <sup>3</sup>                           |                    |
| Theta range for data collection   | 3.353 to 26.000°.                                               |                    |
| Index ranges                      | -14<=h<=13, -11<=k<=14, -15<=l<=15                              |                    |
| Reflections collected             | 8037                                                            |                    |
| Independent reflections           | 3205 [R(int) = 0.0222]                                          |                    |
| Completeness to theta = 25.242°   | 99.1 %                                                          |                    |
| Absorption correction             | Semi-empirical from equivalents                                 |                    |
| Max. and min. transmission        | 0.7456 and 0.6765                                               |                    |
| Refinement method                 | Full-matrix least-squares on F <sup>2</sup>                     |                    |
| Data / restraints / parameters    | 3205 / 0 / 228                                                  |                    |
| Goodness-of-fit on F <sup>2</sup> | 1.033                                                           |                    |
| Final R indices [I>2sigma(I)]     | R1 = 0.0399, wR2 = 0.0881                                       |                    |
| R indices (all data)              | R1 = 0.0528, wR2 = 0.0980                                       |                    |
| Extinction coefficient            | 0.025(4)                                                        |                    |
| Largest diff. peak and hole       | 0.219 and -0.269 e.Å <sup>-3</sup>                              |                    |

## 6. References



- (1) M. Mato, B. Herle and A. M. Echavarren, Cyclopropanation by Gold- or Zinc-Catalyzed Retro-Buchner Reaction at Room Temperature, *Org. Lett.*, 2018, **20**, 4341-4345.
- (2) M. Schedler, D. S. Wang and F. Glorius, NHC-catalyzed hydroacylation of styrenes. *Angew. Chem. Int. Ed.*, 2013, **52**, 2585-2589.
- (3) Y. Liu, H. Wu, Y. Guo, J.-C. Xiao, Q.-Y. Chen and C. Liu, Trifluoromethylfluorosulfonylation of Unactivated Alkenes Using Readily Available Ag(O<sub>2</sub>CCF<sub>2</sub>SO<sub>2</sub>F) and N-Fluorobenzenesulfonimide. *Angew. Chem. Int. Ed.*, 2017, **56**, 15432-15435.
- (4) S. Liu, Y. Huang, F.-L. Qing and X.-H. Xu, Transition-Metal-Free Decarboxylation of 3,3,3-Trifluoro-2,2-dimethylpropanoic Acid for the Preparation of C(CF<sub>3</sub>)Me<sub>2</sub>-Containing Heteroarenes. *Org. Lett.*, 2018, **20**, 5497-5501.
- (5) J. Xu, H. Yang, H. Cai, H. Bao, W. Li and P. Zhang, Transition-Metal and Solvent-Free Oxidative C-H Fluoroalkoxylation of Quinoxalinones with Fluoroalkyl Alcohols. *Org. Lett.*, 2019, **21**, 4698-4702.
- (6) H.-Y. Su, X.-L. Zhu, Y. Huang, X.-H. Xu, and F.-L. Qing, Copper-catalyzed chemoselective C-H functionalization of quinoxalin-2(1*H*)-ones with hexafluoroisopropanol. *Chem. Commun.*, 2020, **56**, 12805-12808.
- (7) J. Wang, B. Sun, L. Zhang, T. Xu, Y. Xie and C. Jin, Transition-metal-free direct C-3 cyanation of quinoxalin-2(1*H*)-ones with ammonium thiocyanate as the “CN” source. *Org. Chem. Front.*, 2020, **7**, 113-118.
- (8) T. Yang, H. Zhu and W. Yu, Copper-catalyzed radical reactions of 2-azido-N-arylacrylamides with 1-(trifluoromethyl)-1,2-benziodoxole and 1-azidyl-1,2-benziodoxole. *Org. Chem. Chem.*, 2016, **14**, 3376-3384.

## 7. Copies of <sup>1</sup>H NMR, <sup>19</sup>F NMR and <sup>13</sup>C NMR Spectra of Products

$^1\text{H NMR}$  (400 MHz,  $\text{CDCl}_3$ )

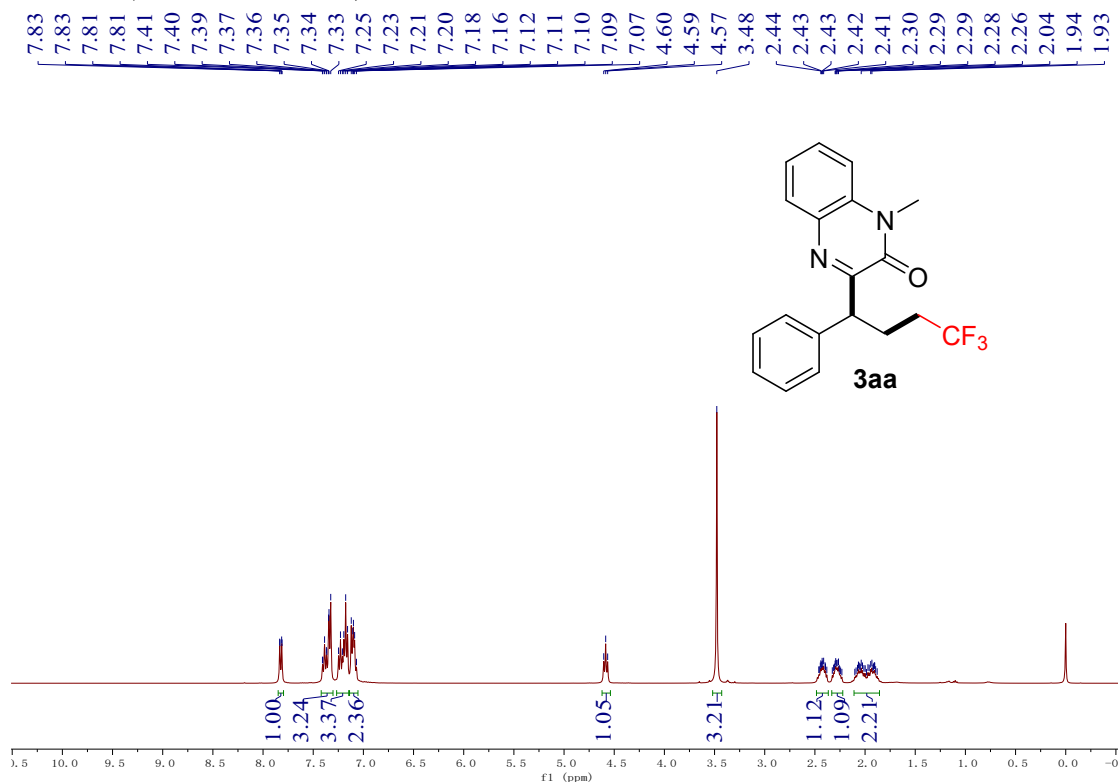

$^{13}\text{C NMR}$  (101 MHz,  $\text{CDCl}_3$ )

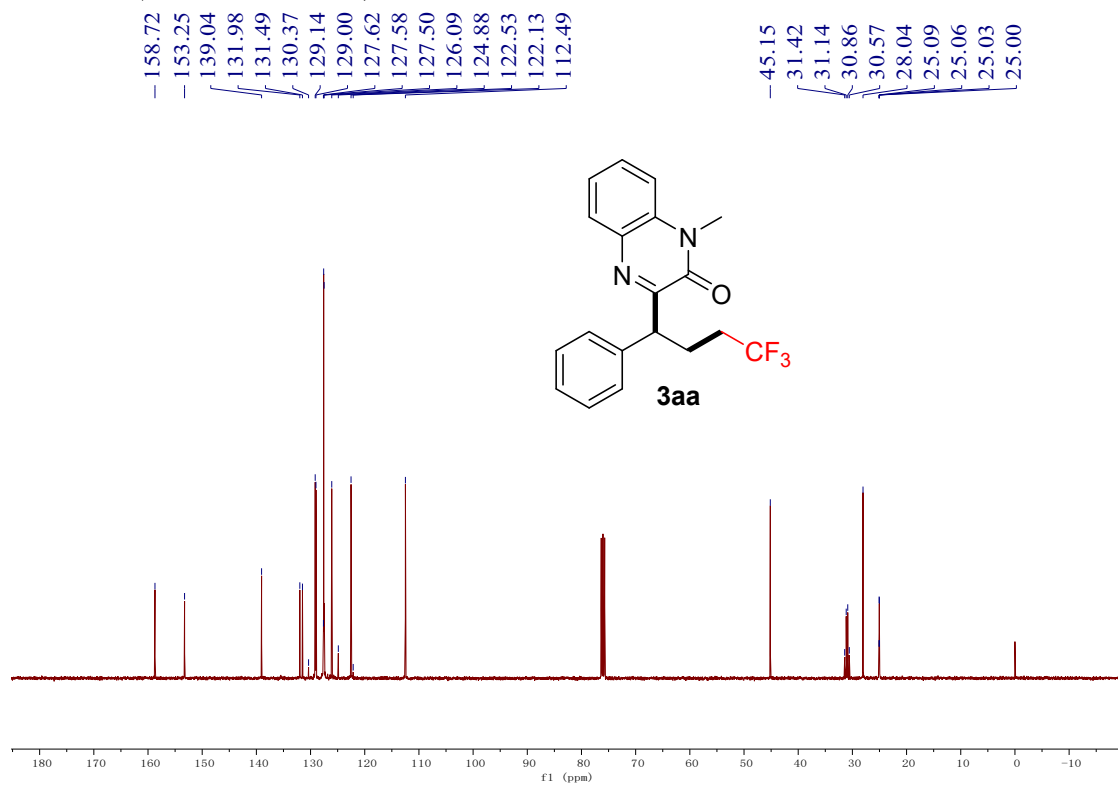

$^{19}\text{F}$  NMR (377 MHz,  $\text{CDCl}_3$ )

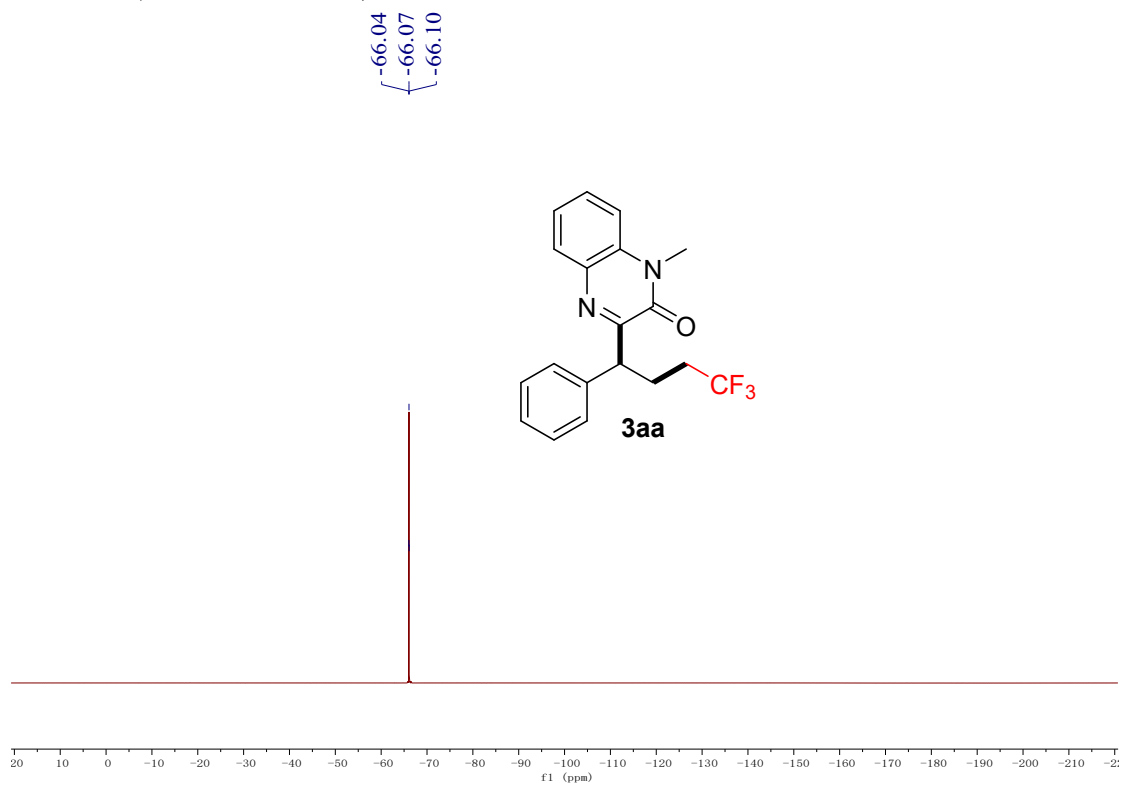

$^1\text{H}$  NMR (400 MHz,  $\text{CDCl}_3$ )

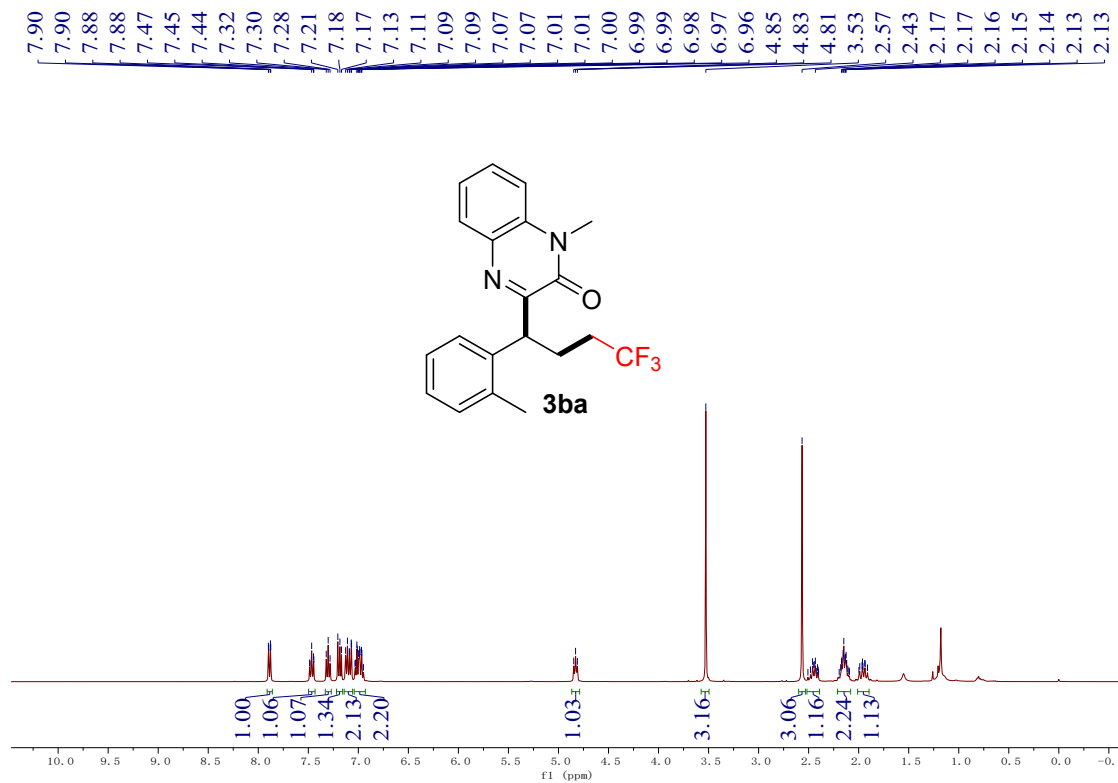

$^{13}\text{C}$  NMR (101 MHz,  $\text{CDCl}_3$ )

160.13  
154.45  
138.85  
136.95  
133.04  
132.54  
131.43  
130.76  
130.25  
130.05  
128.69  
126.87  
126.75  
126.12  
125.94  
123.63  
123.19  
113.59  
41.58  
32.34  
32.05  
31.77  
31.49  
29.73  
29.14  
26.39  
26.36  
19.90

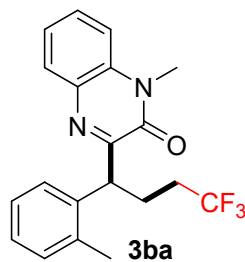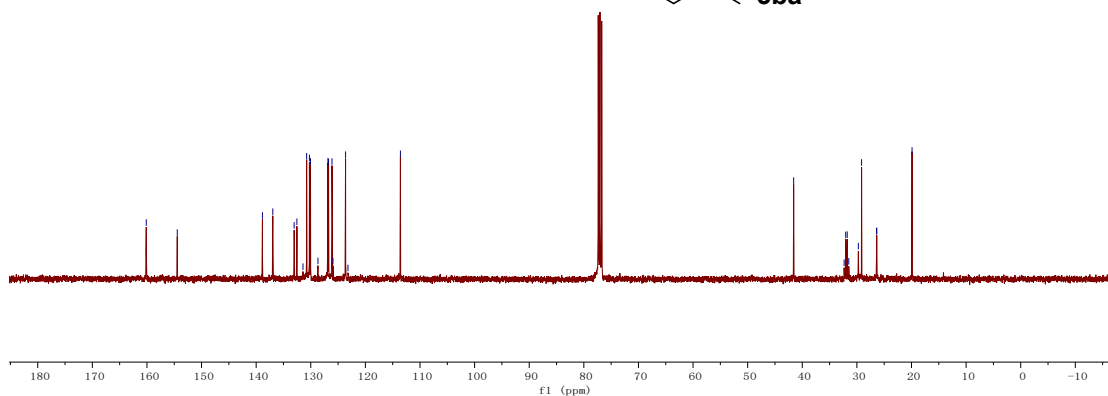

$^{19}\text{F}$  NMR (377 MHz,  $\text{CDCl}_3$ )

-66.11  
-66.14  
-66.17

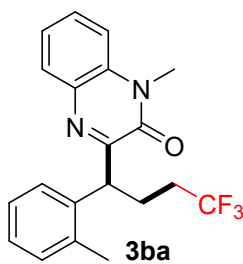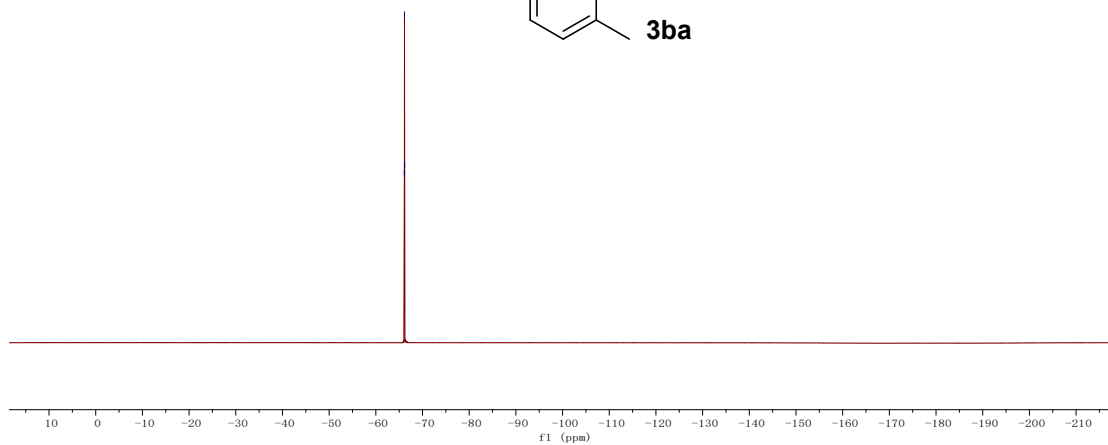

$^1\text{H NMR}$  (400 MHz,  $\text{CDCl}_3$ )

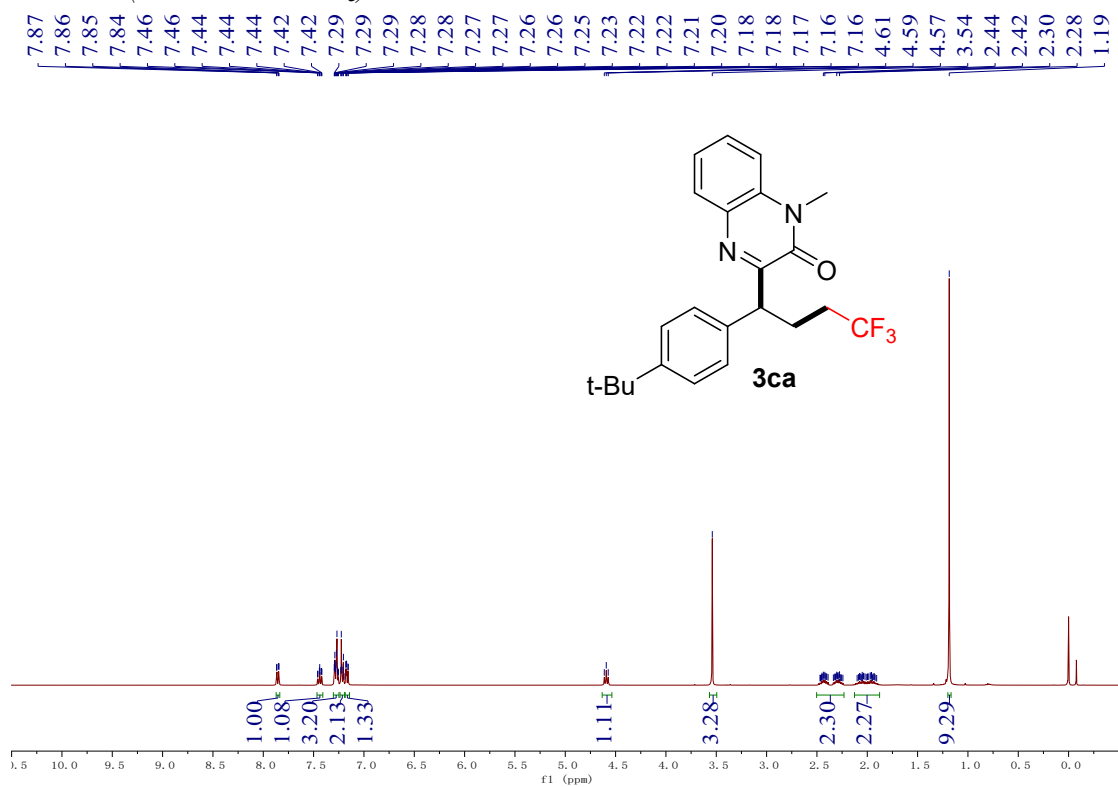

$^{13}\text{C NMR}$  (101 MHz,  $\text{CDCl}_3$ )

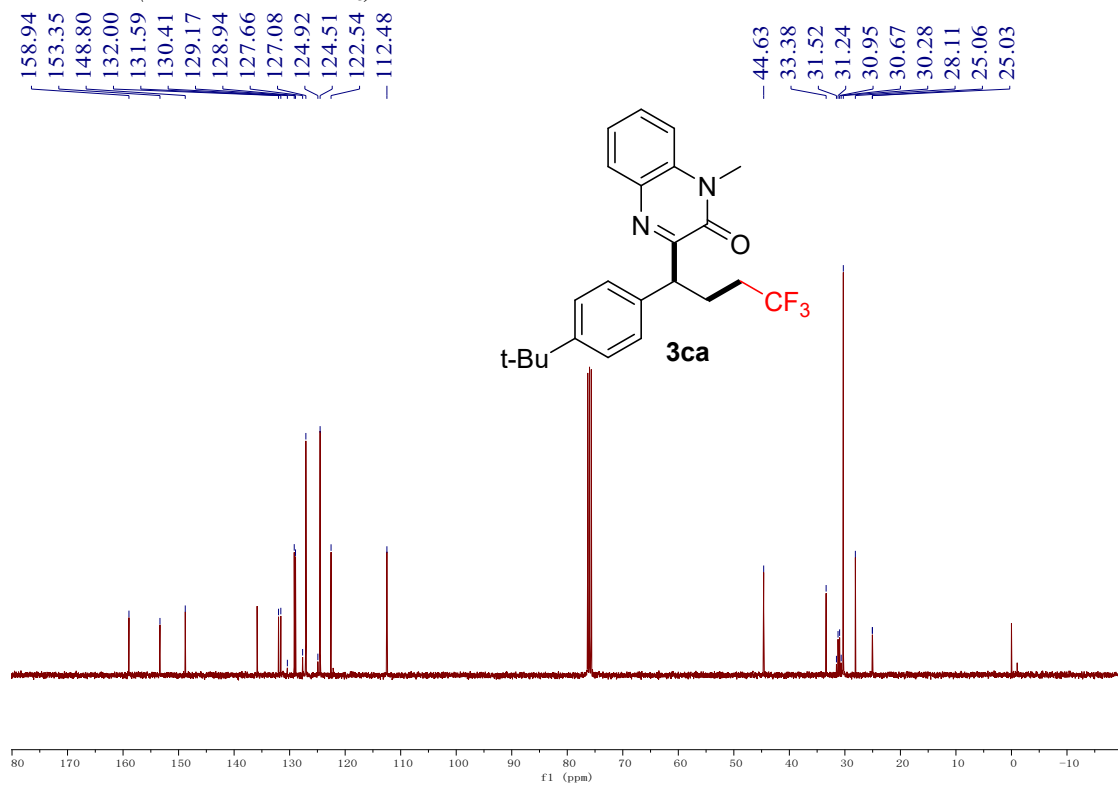

$^{19}\text{F}$  NMR (377 MHz,  $\text{CDCl}_3$ )

-66.08  
-66.11  
-66.14

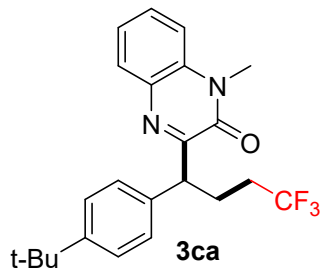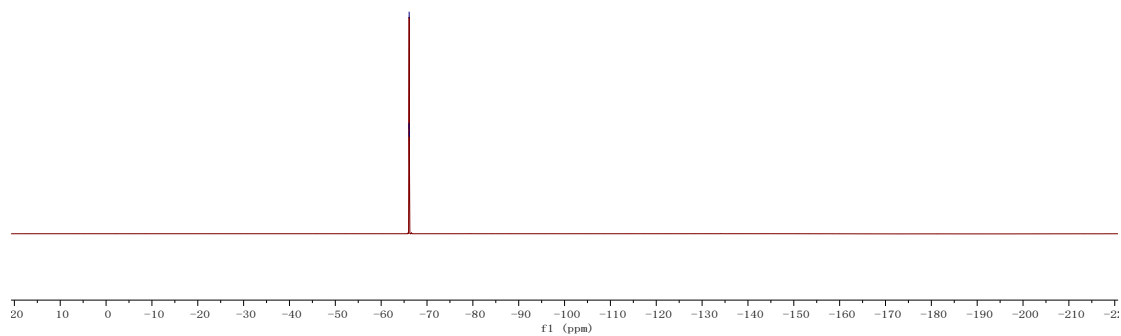

$^1\text{H}$  NMR (400 MHz,  $\text{CDCl}_3$ )

7.83  
7.82  
7.81  
7.80  
7.41  
7.41  
7.39  
7.39  
7.37  
7.37  
7.26  
7.26  
7.25  
7.25  
7.24  
7.23  
7.21  
7.21  
7.13  
7.13  
7.11  
7.11  
6.74  
6.73  
6.73  
6.71  
6.71  
6.70  
4.55  
4.53  
4.51  
3.63  
3.49  
2.38  
2.37  
2.27  
2.25  
2.24  
2.03  
1.94  
1.93

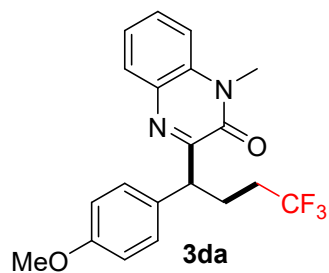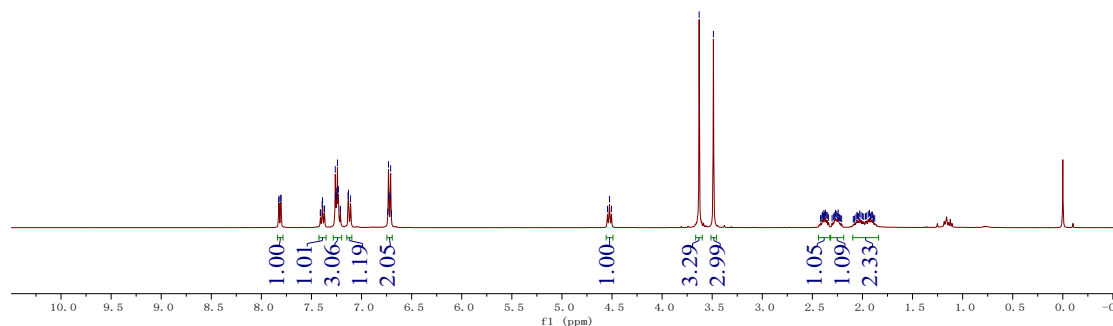

$^{13}\text{C}$  NMR (101 MHz,  $\text{CDCl}_3$ )

158.91  
157.64  
153.25  
131.95  
131.50  
130.90  
130.42  
129.07  
128.92  
128.52  
127.67  
124.93  
122.52  
122.18  
112.99  
112.50  
-54.10  
-44.39  
-31.11  
-30.83  
-30.54  
-28.04  
-25.07  
-25.01  
-24.98

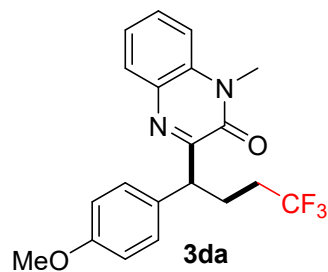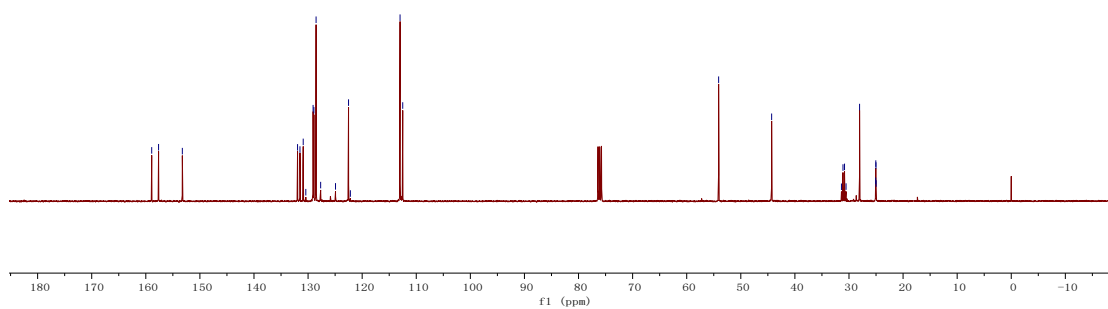

$^{19}\text{F}$  NMR (377 MHz,  $\text{CDCl}_3$ )

-66.00  
-66.03  
-66.05

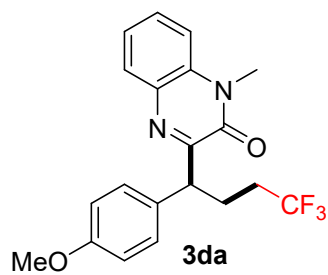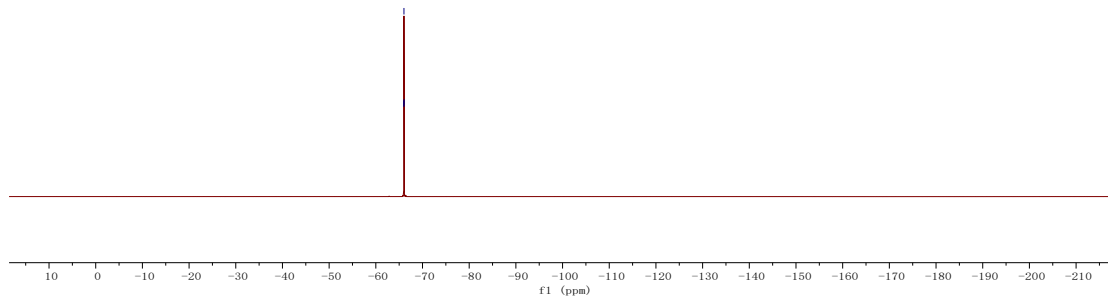

$^1\text{H NMR}$  (400 MHz,  $\text{CDCl}_3$ )

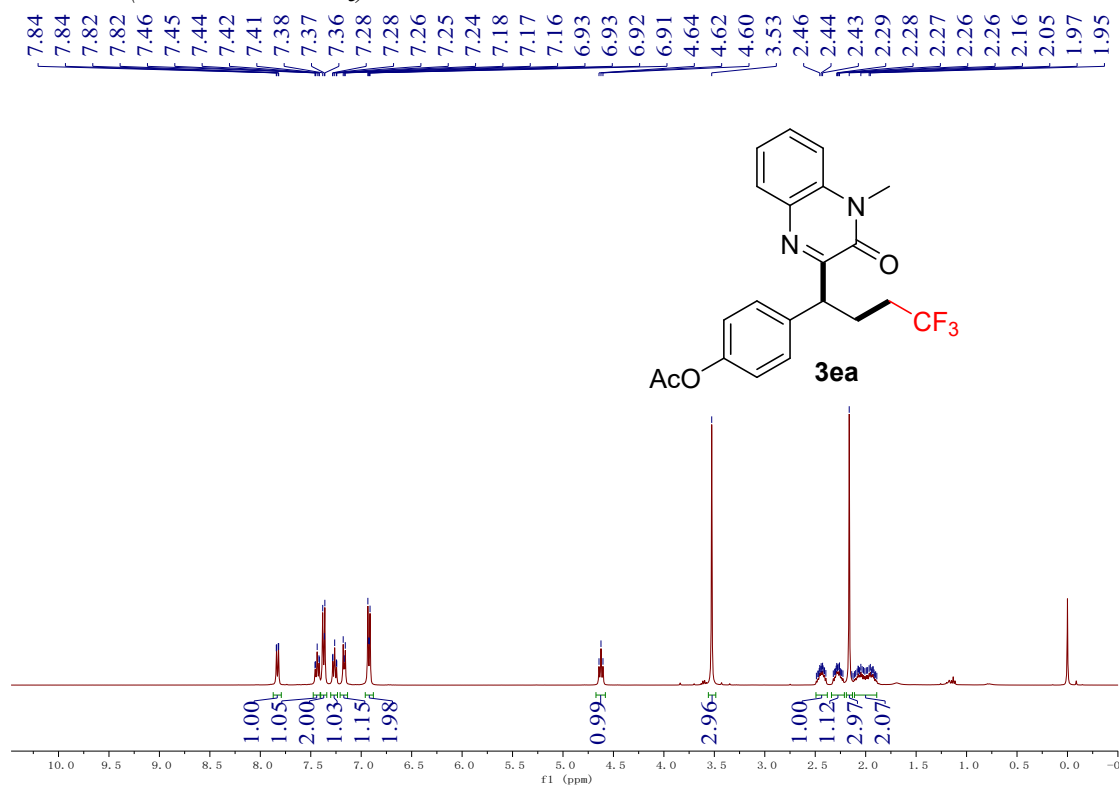

$^{13}\text{C NMR}$  (101 MHz,  $\text{CDCl}_3$ )

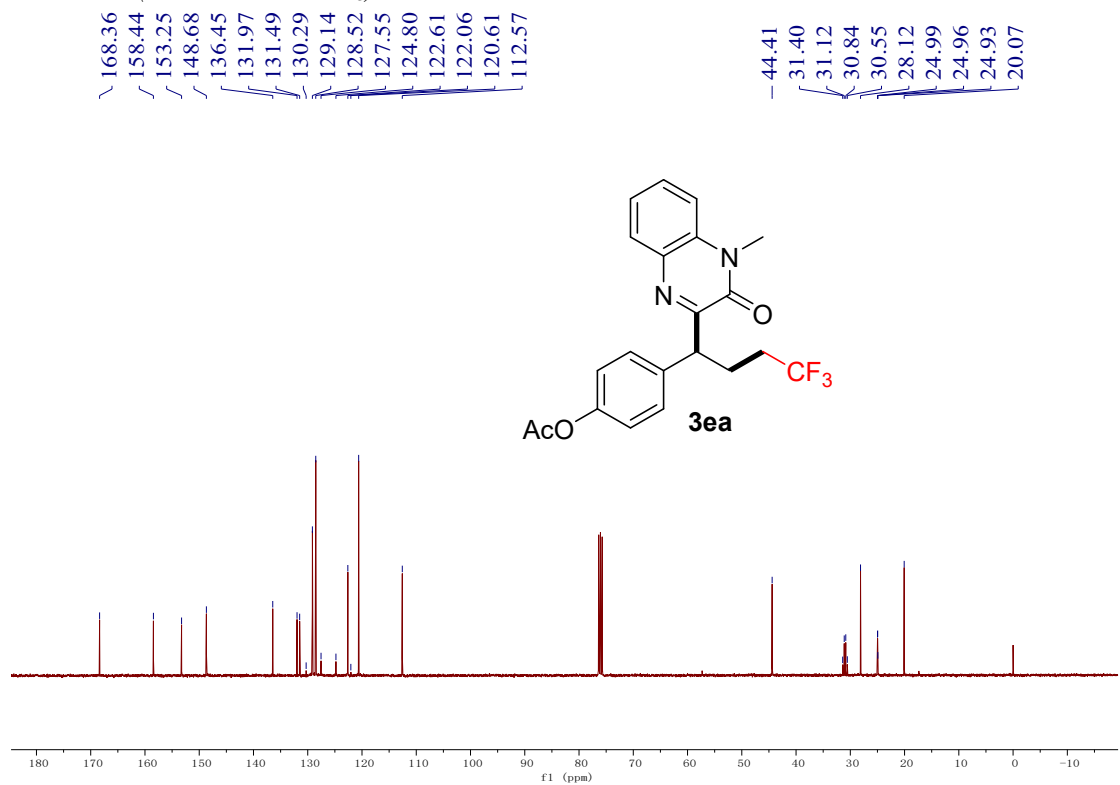



$^{19}\text{F}$  NMR (377 MHz,  $\text{CDCl}_3$ )

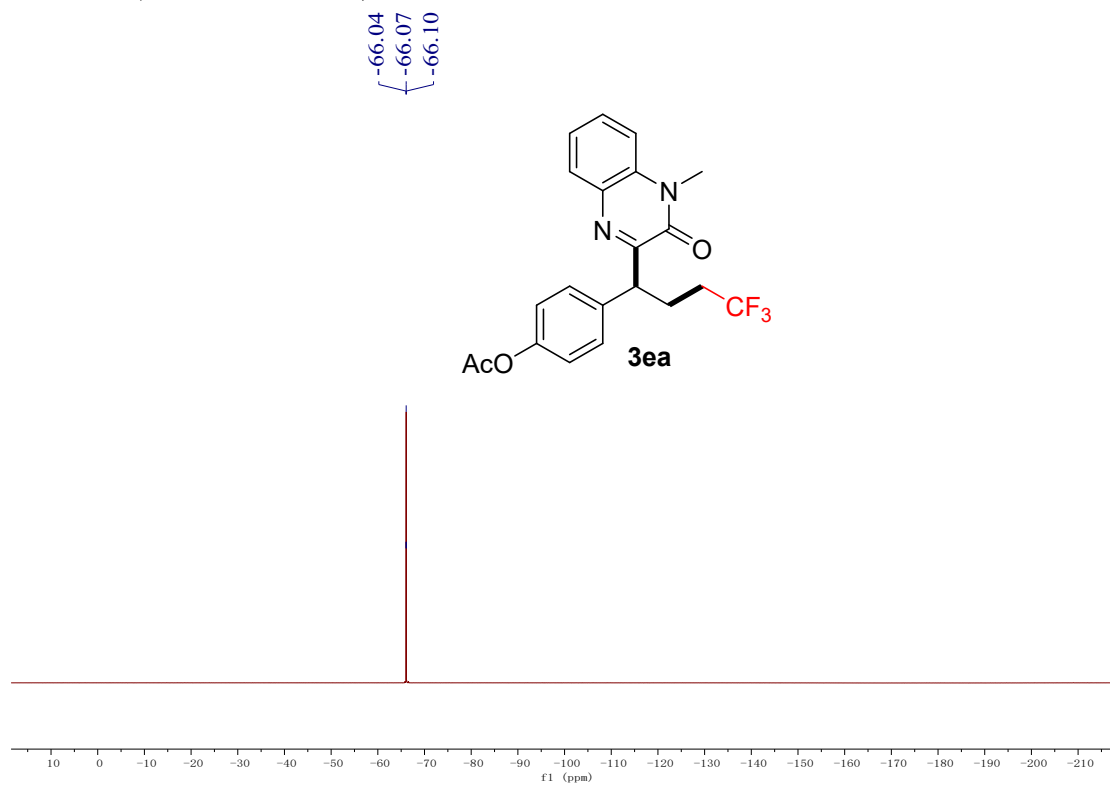

$^1\text{H}$  NMR (400 MHz,  $\text{CDCl}_3$ )

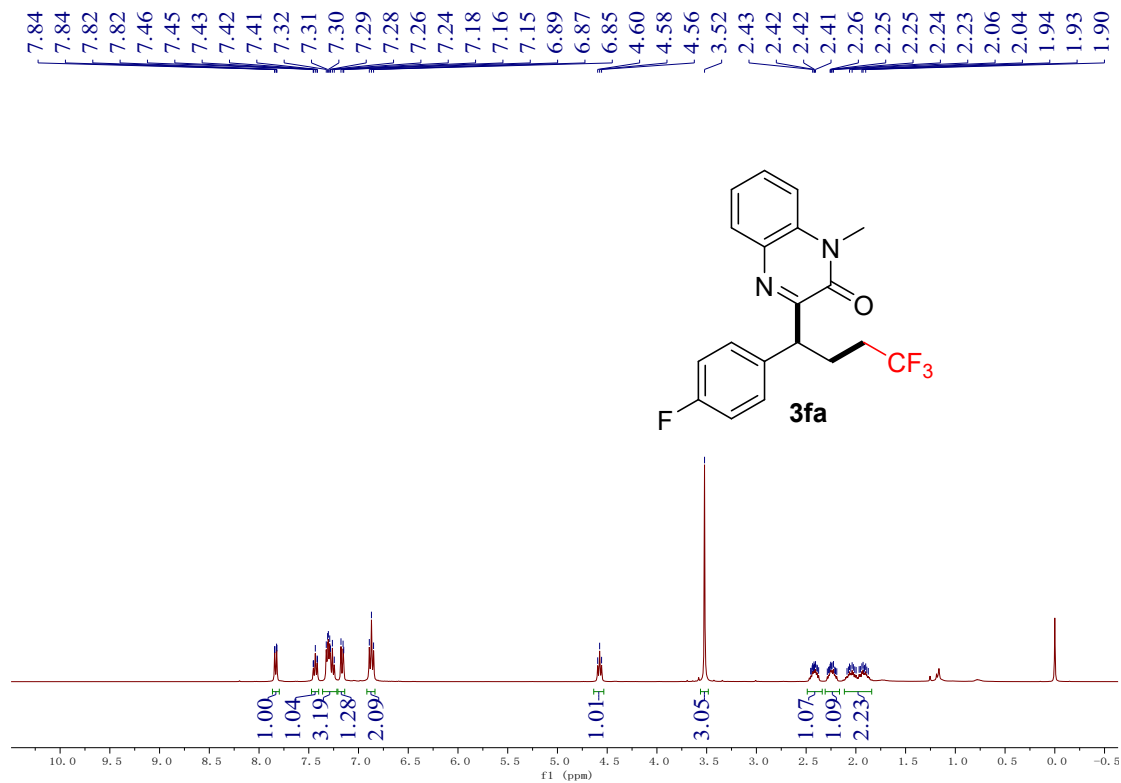

$^{13}\text{C}$  NMR (101 MHz,  $\text{CDCl}_3$ )

162.13  
159.69  
158.49  
153.25  
134.76  
134.72  
131.99  
131.48  
130.30  
129.17  
129.06  
128.98  
127.55  
124.81  
122.65  
122.06  
114.54  
114.53  
114.33  
112.58

44.37  
31.36  
31.08  
30.79  
30.51  
28.09  
25.11  
25.08

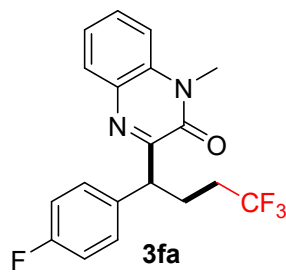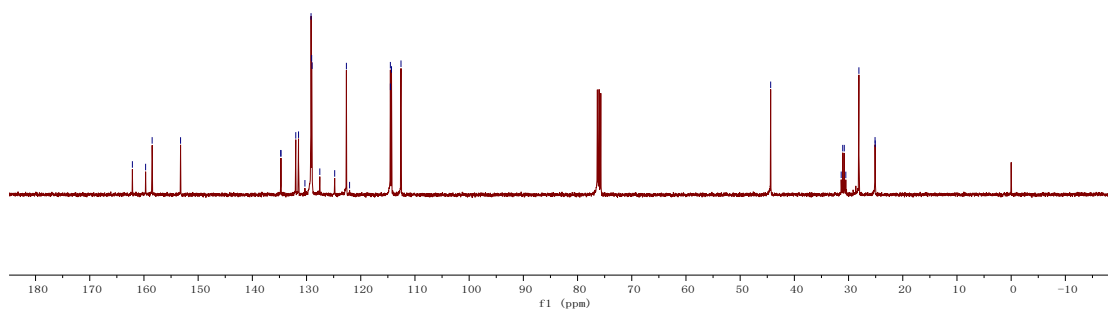

$^{19}\text{F}$  NMR (377 MHz,  $\text{CDCl}_3$ )

-66.05  
-66.08  
-66.11

-115.49  
-115.51  
-115.51  
-115.53  
-115.54  
-115.55  
-115.57

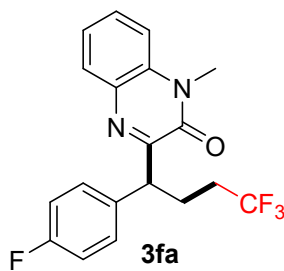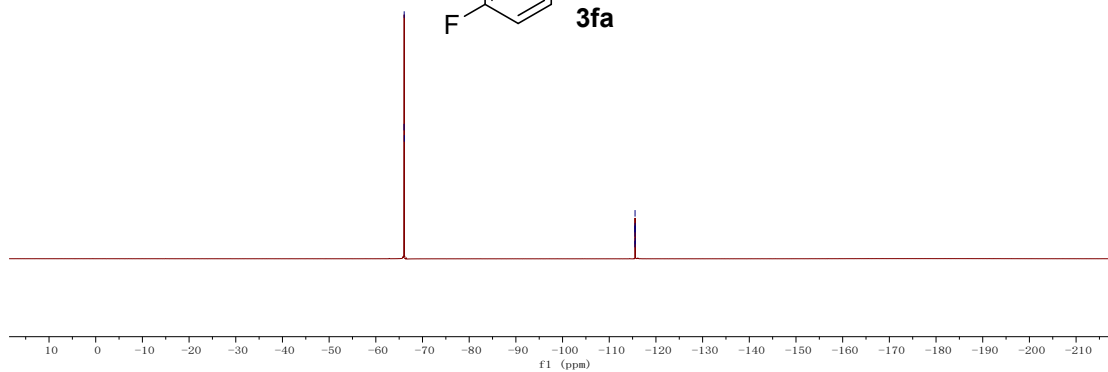

$^1\text{H NMR}$  (400 MHz,  $\text{CDCl}_3$ )

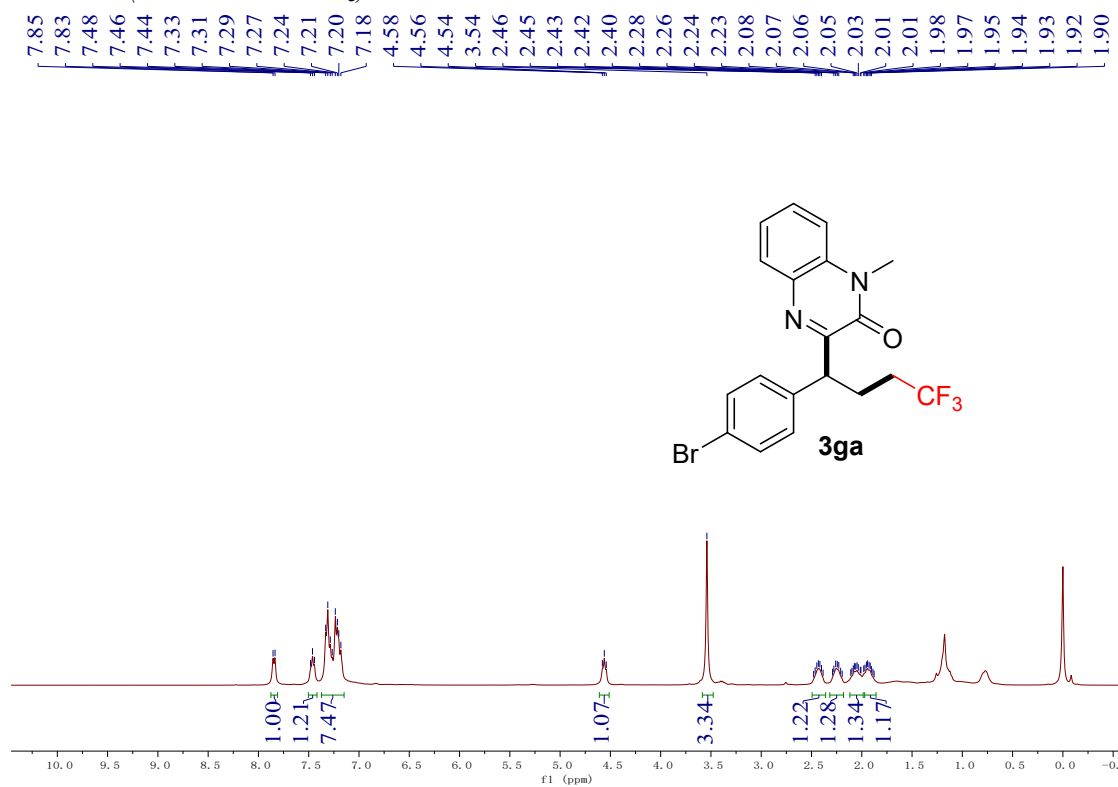

$^{13}\text{C NMR}$  (101 MHz,  $\text{CDCl}_3$ )

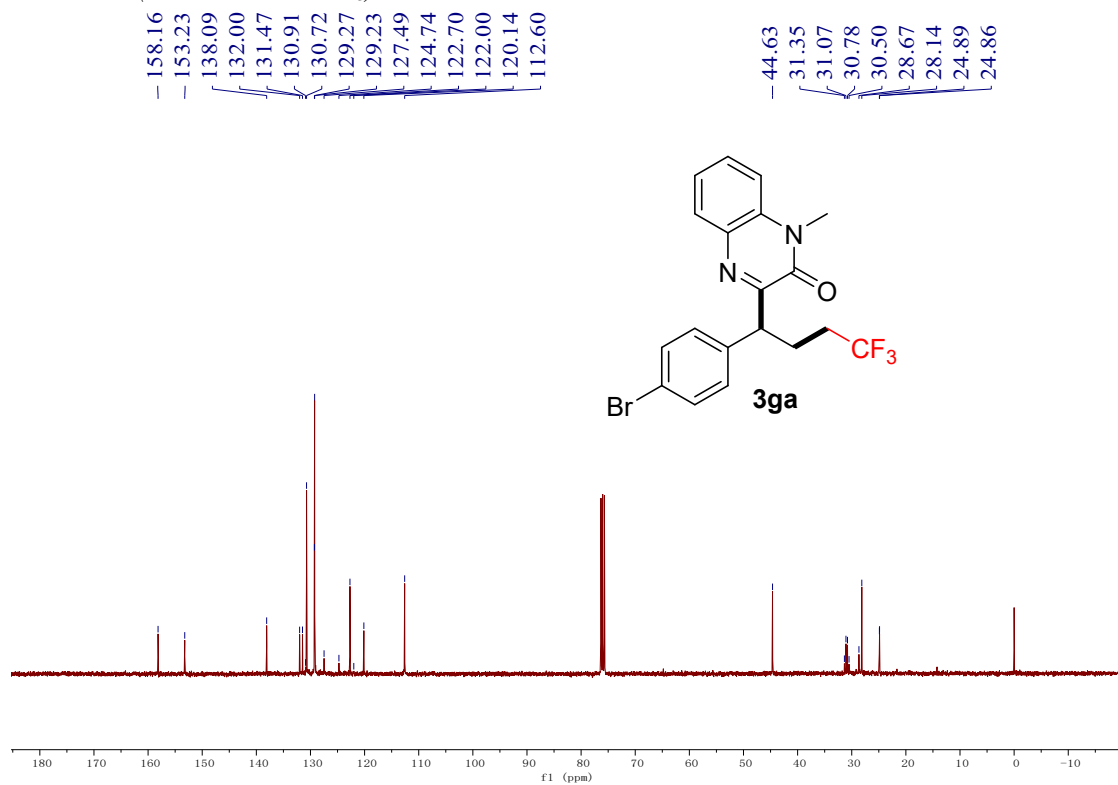

$^{19}\text{F}$  NMR (377 MHz,  $\text{CDCl}_3$ )

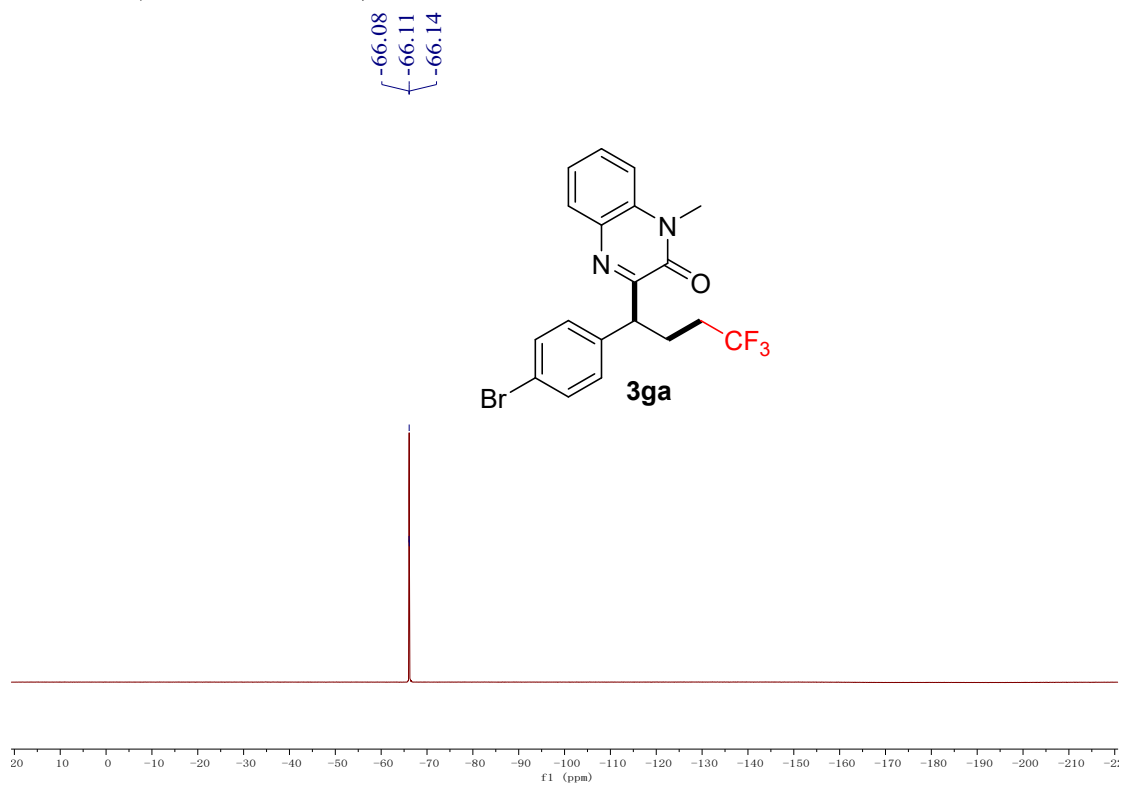

$^1\text{H}$  NMR (400 MHz,  $\text{CDCl}_3$ )

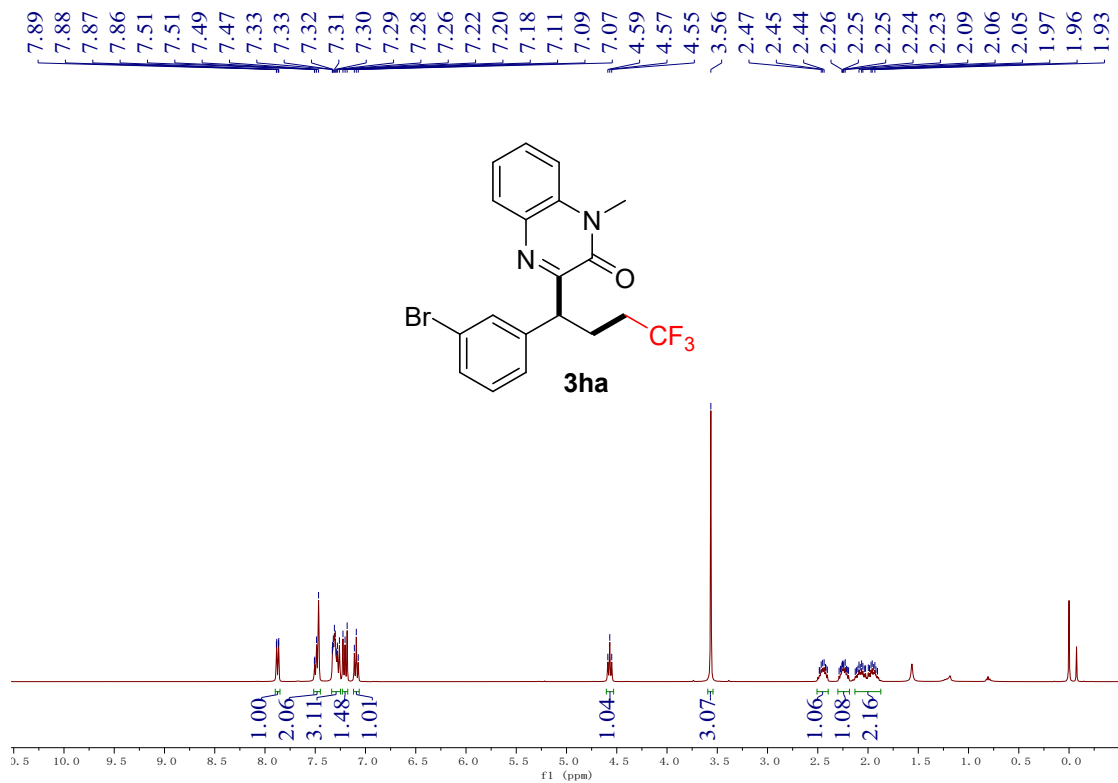

$^{13}\text{C}$  NMR (101 MHz,  $\text{CDCl}_3$ )

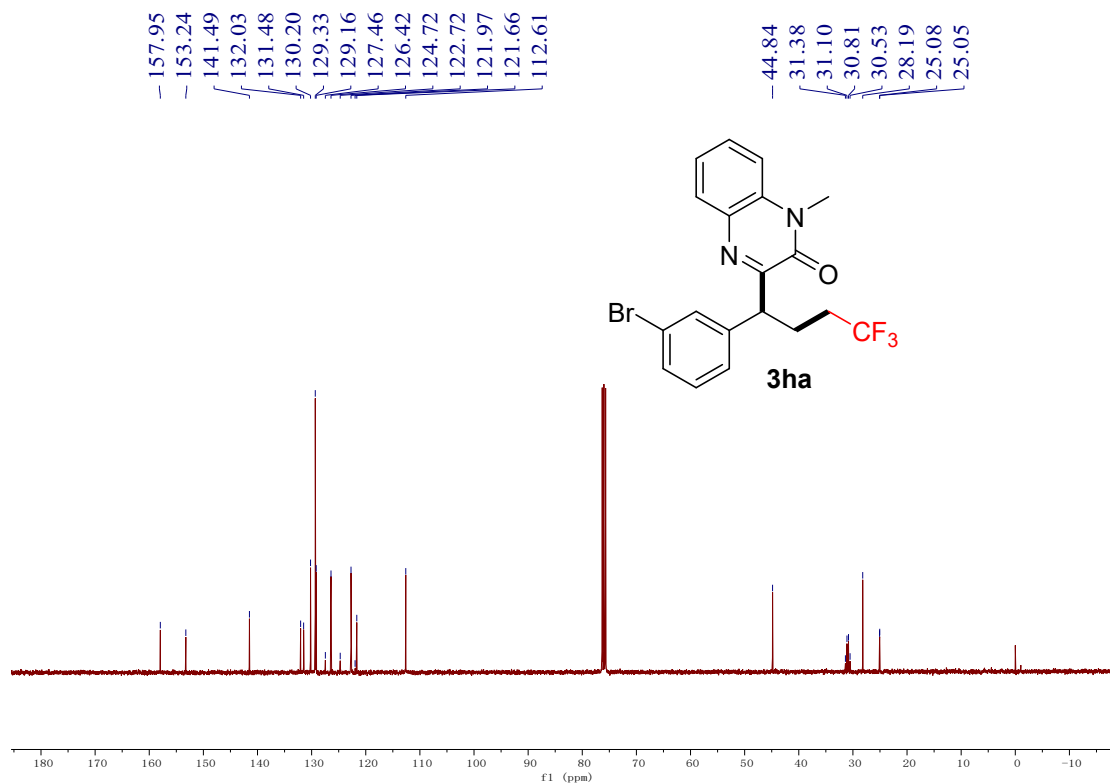

$^{19}\text{F}$  NMR (377 MHz,  $\text{CDCl}_3$ )

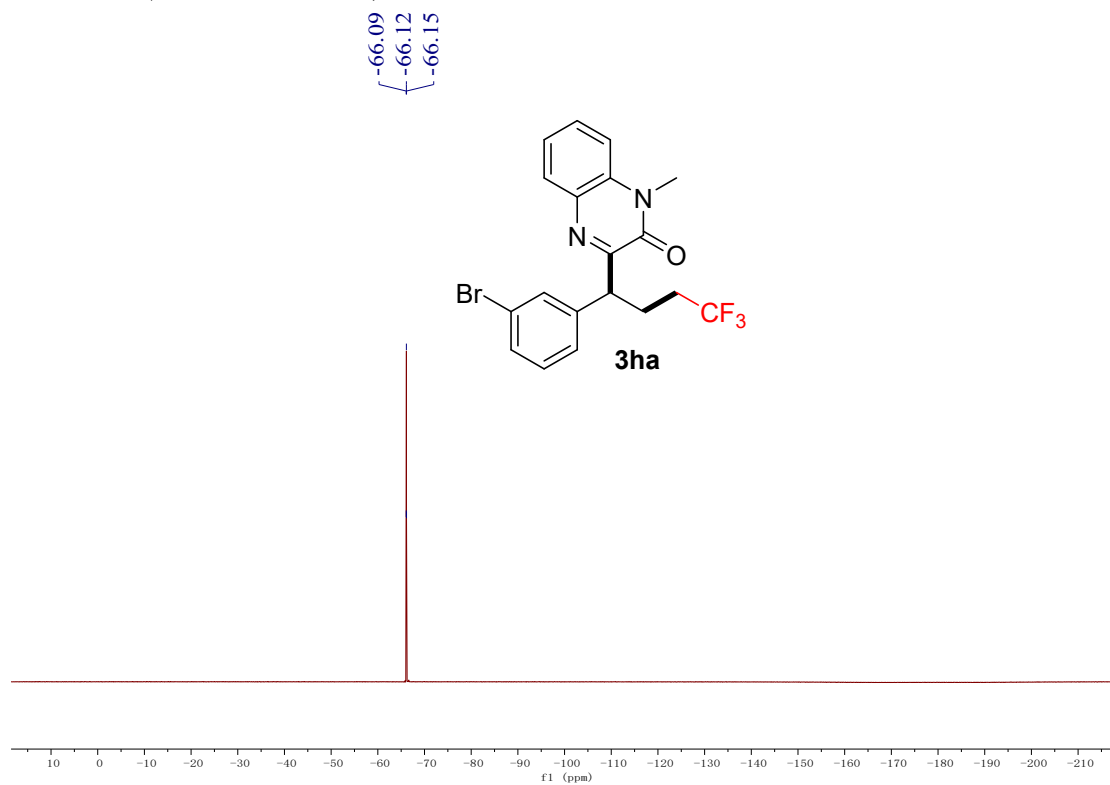

$^1\text{H NMR}$  (400 MHz,  $\text{CDCl}_3$ )

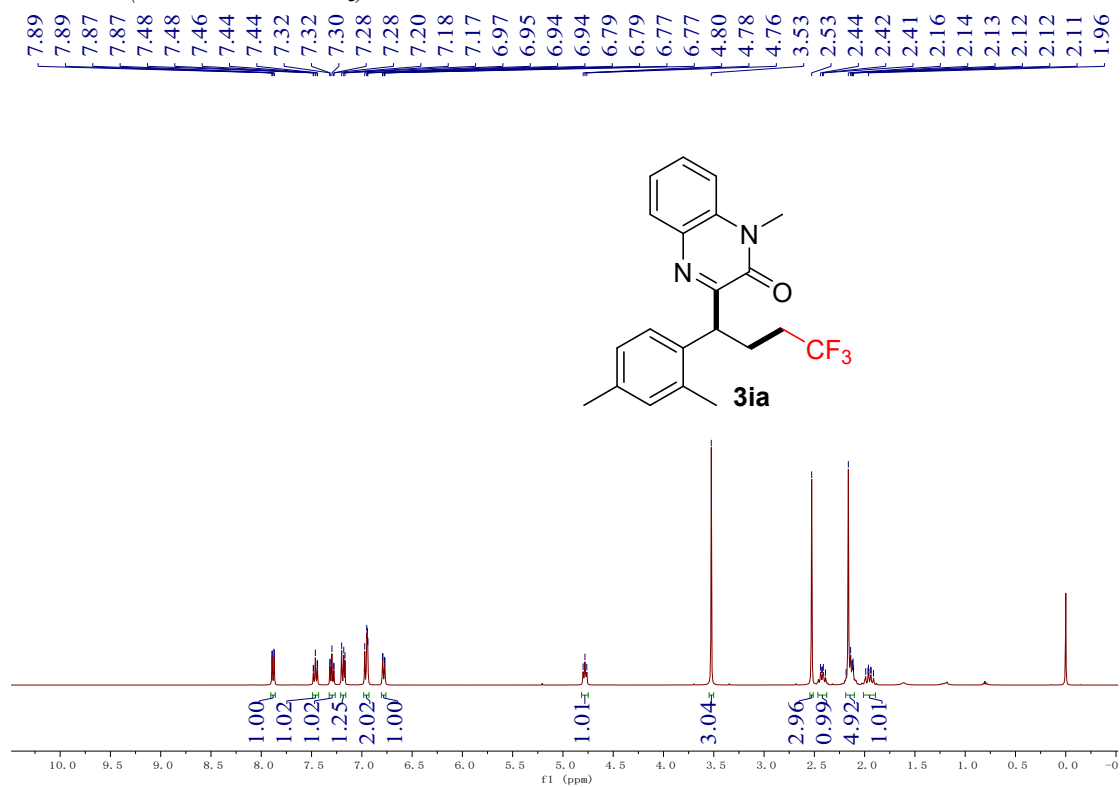

$^{13}\text{C NMR}$  (101 MHz,  $\text{CDCl}_3$ )

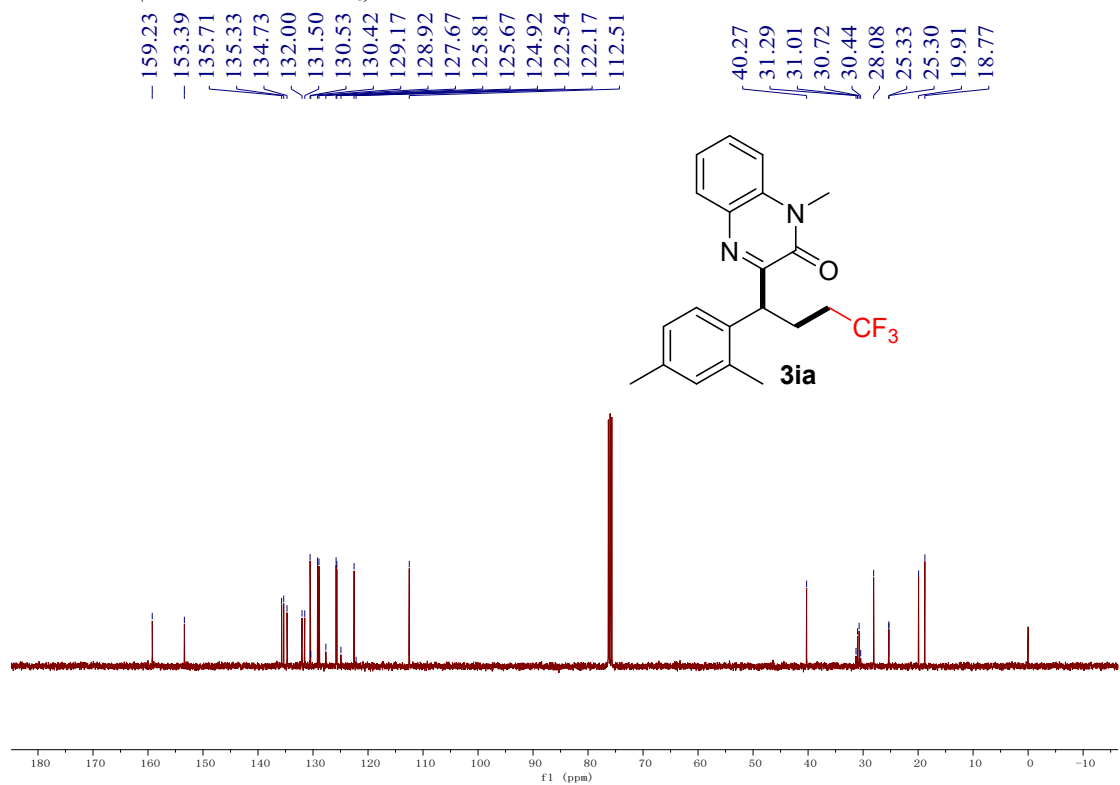

$^{19}\text{F}$  NMR (377 MHz,  $\text{CDCl}_3$ )

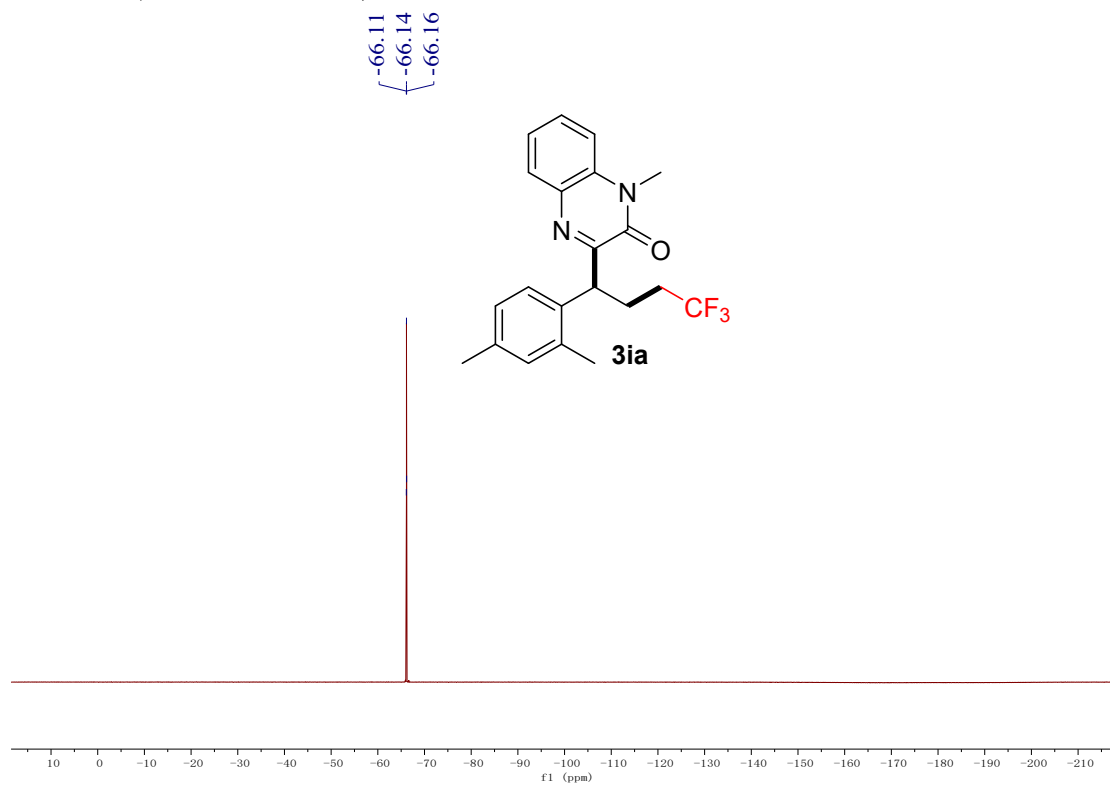

$^1\text{H}$  NMR (400 MHz,  $\text{CDCl}_3$ )

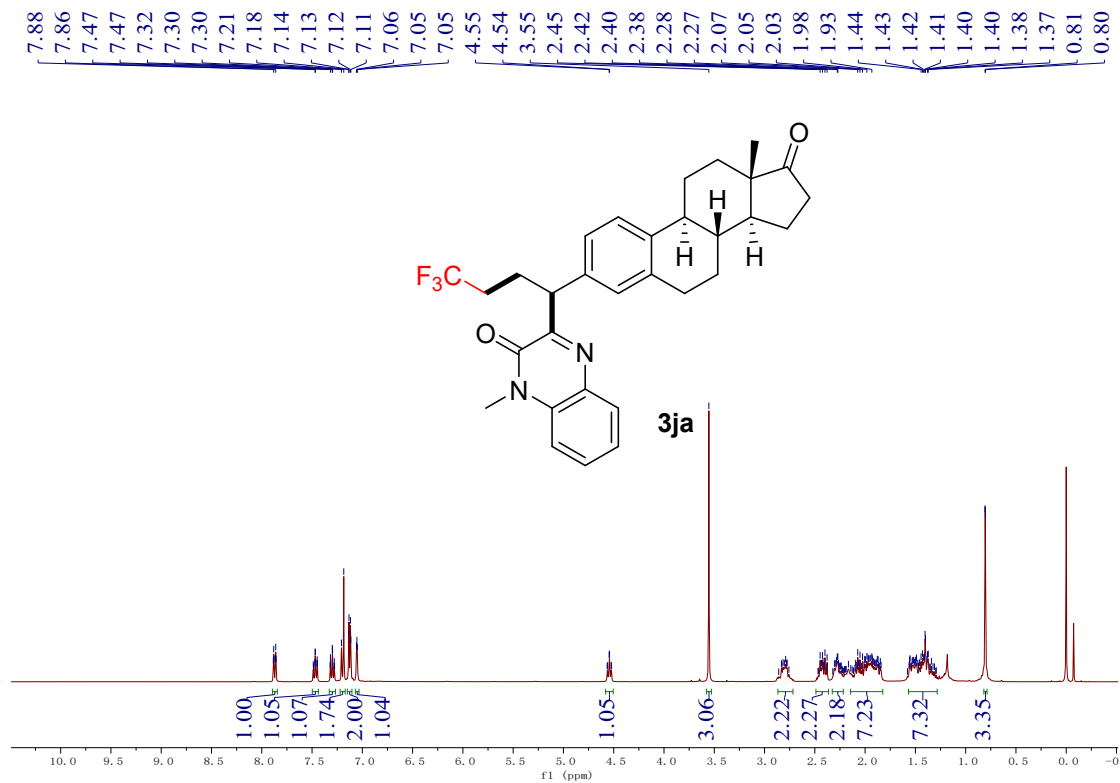

$^{13}\text{C}$  NMR (101 MHz,  $\text{CDCl}_3$ )

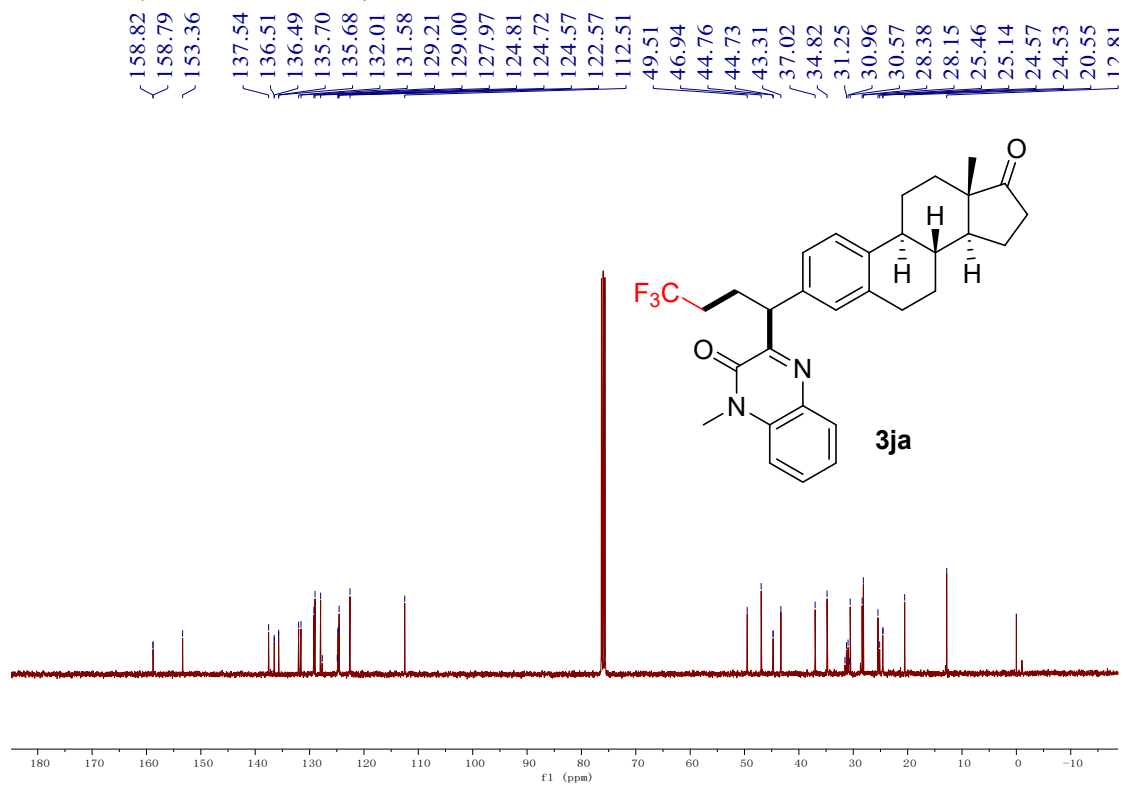

$^{19}\text{F}$  NMR (377 MHz,  $\text{CDCl}_3$ )

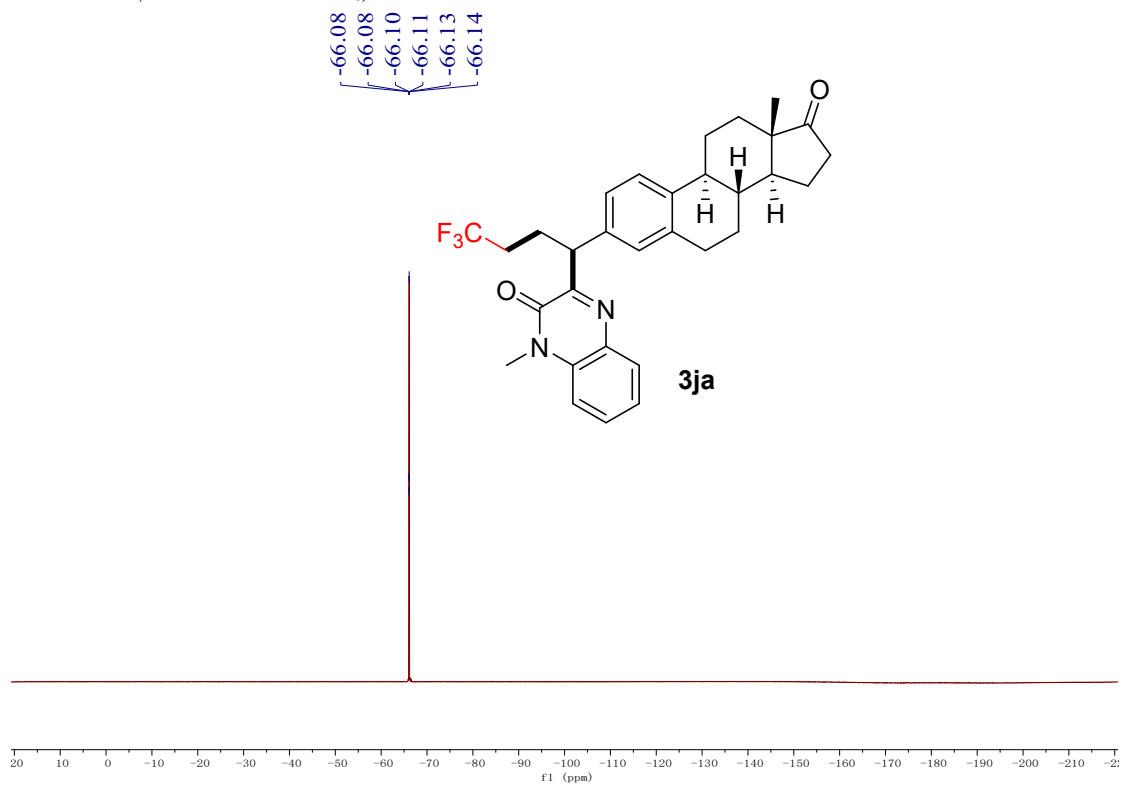



<sup>1</sup>H NMR (400 MHz, CDCl<sub>3</sub>)

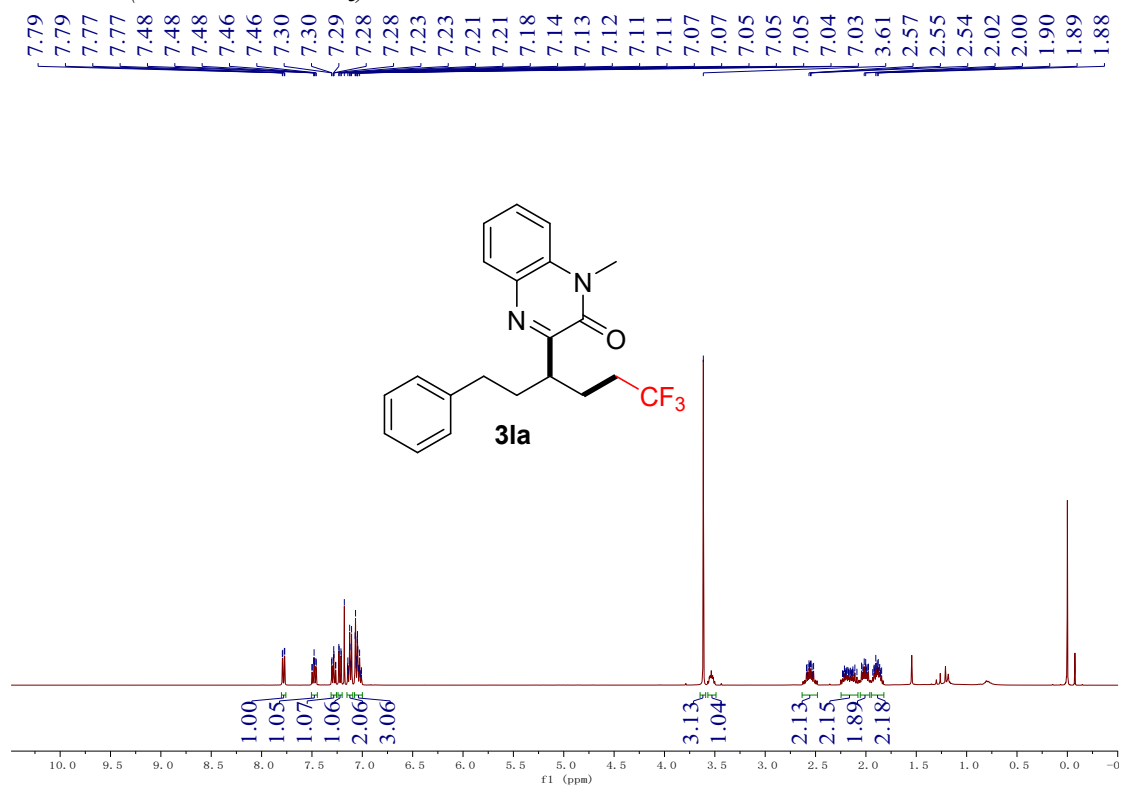

<sup>13</sup>C NMR (101 MHz, CDCl<sub>3</sub>)

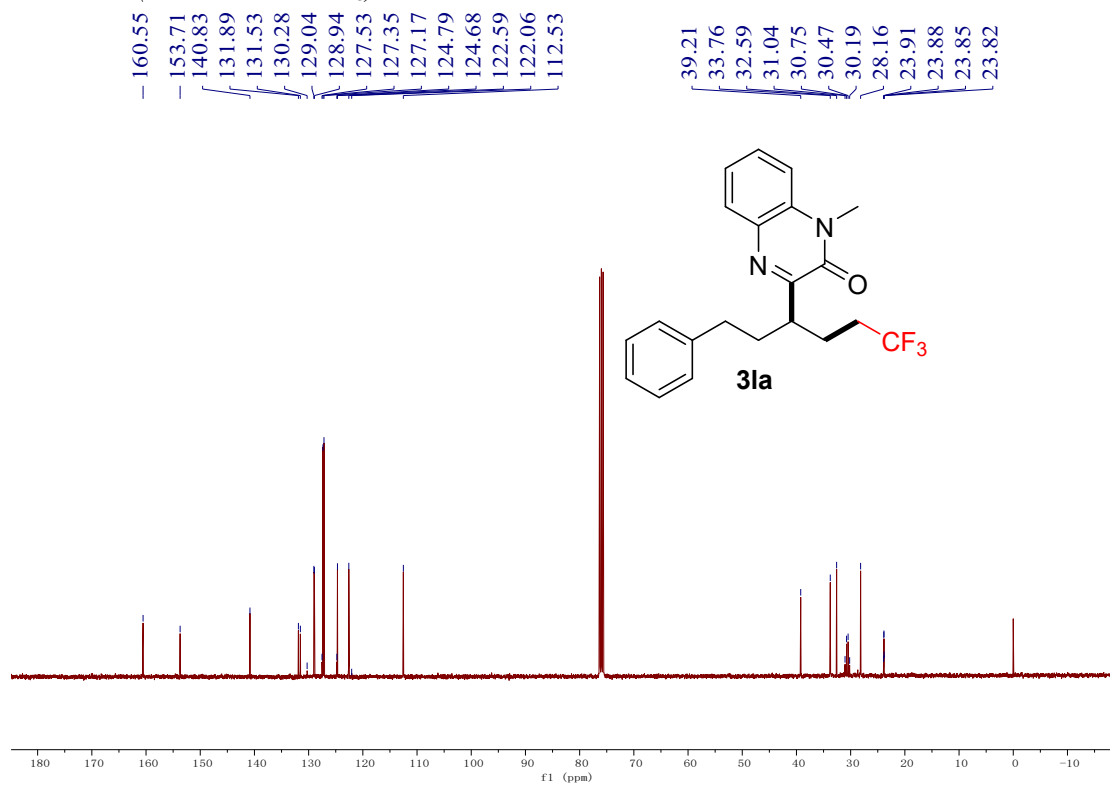

$^{19}\text{F}$  NMR (377 MHz,  $\text{CDCl}_3$ )

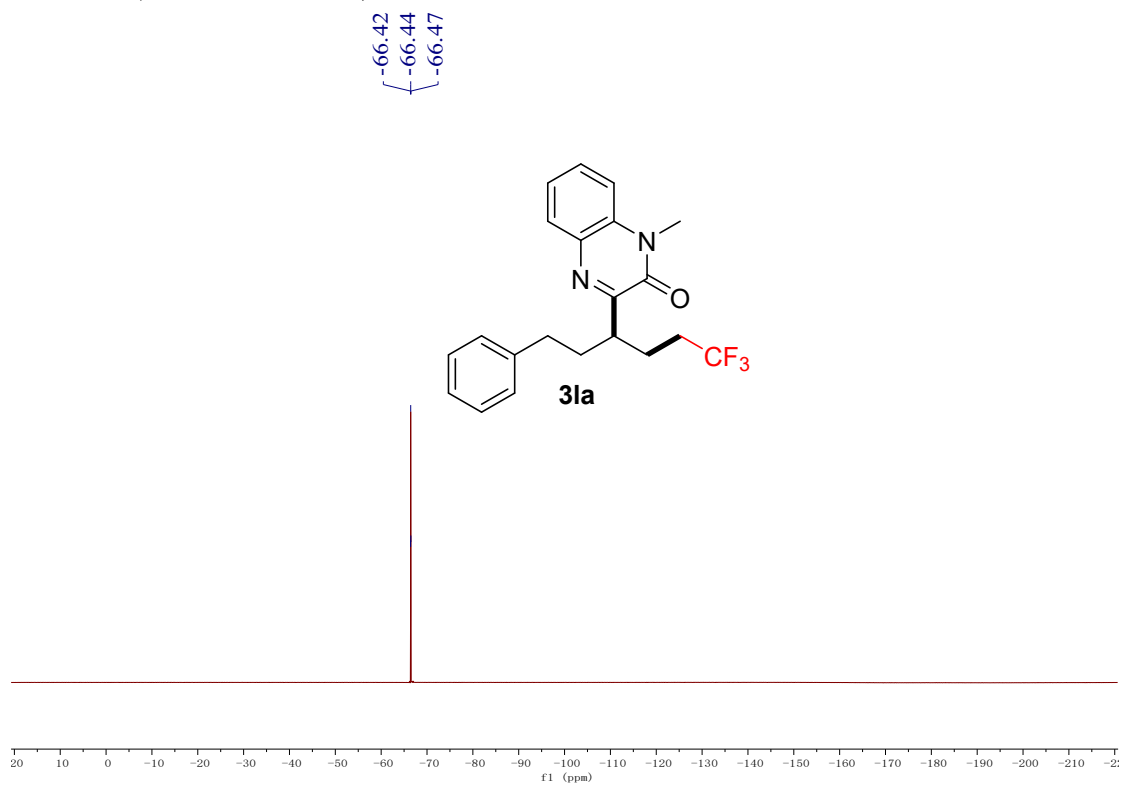

$^1\text{H}$  NMR (400 MHz,  $\text{CDCl}_3$ )

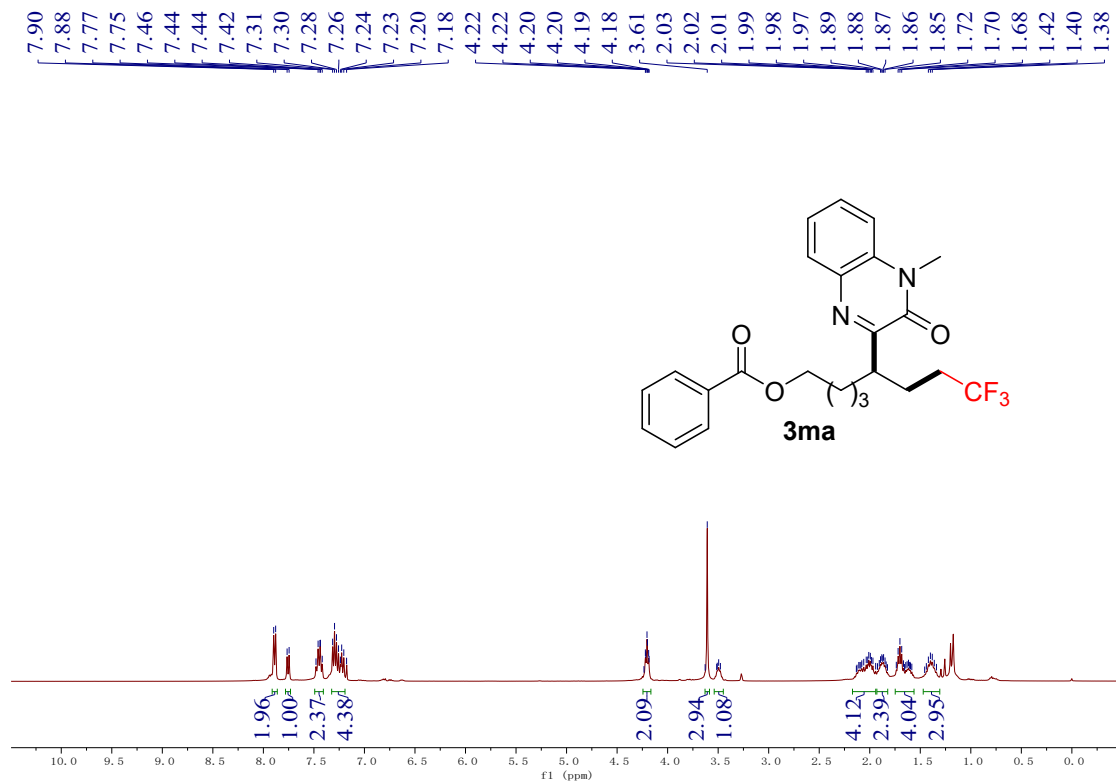

$^{13}\text{C}$  NMR (101 MHz,  $\text{CDCl}_3$ )

~ 166.58  
~ 161.65  
~ 154.80  
~ 132.86  
~ 132.78  
~ 132.61  
~ 131.35  
~ 130.38  
~ 130.06  
~ 130.00  
~ 129.48  
~ 128.60  
~ 128.28  
~ 125.86  
~ 123.11  
~ 113.63

- 64.68  
40.03  
32.75  
32.12  
31.83  
31.55  
31.27  
29.22  
28.73  
24.78  
24.75  
24.72  
23.64

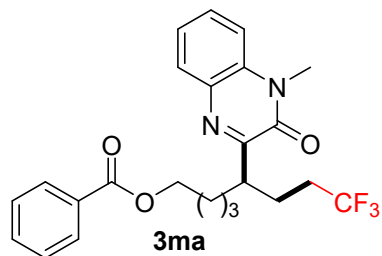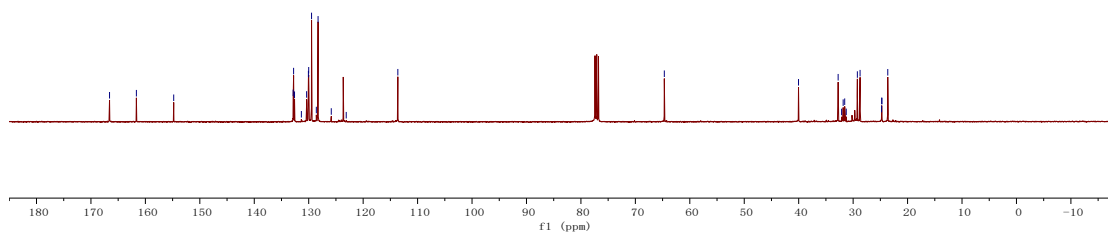

$^{19}\text{F}$  NMR (377 MHz,  $\text{CDCl}_3$ )

-66.39  
-66.42  
-66.45

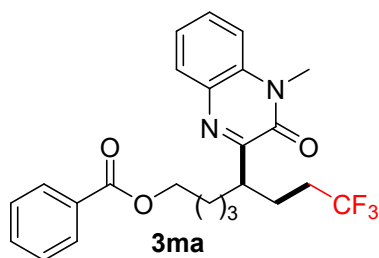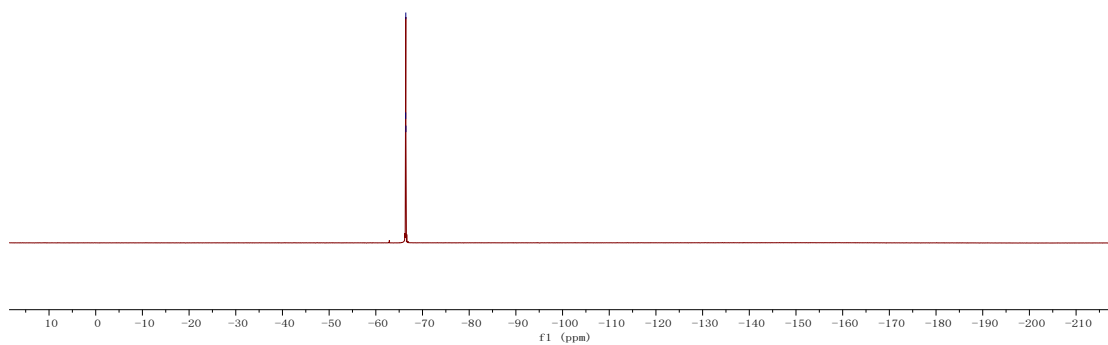

$^1\text{H NMR}$  (400 MHz,  $\text{CDCl}_3$ )

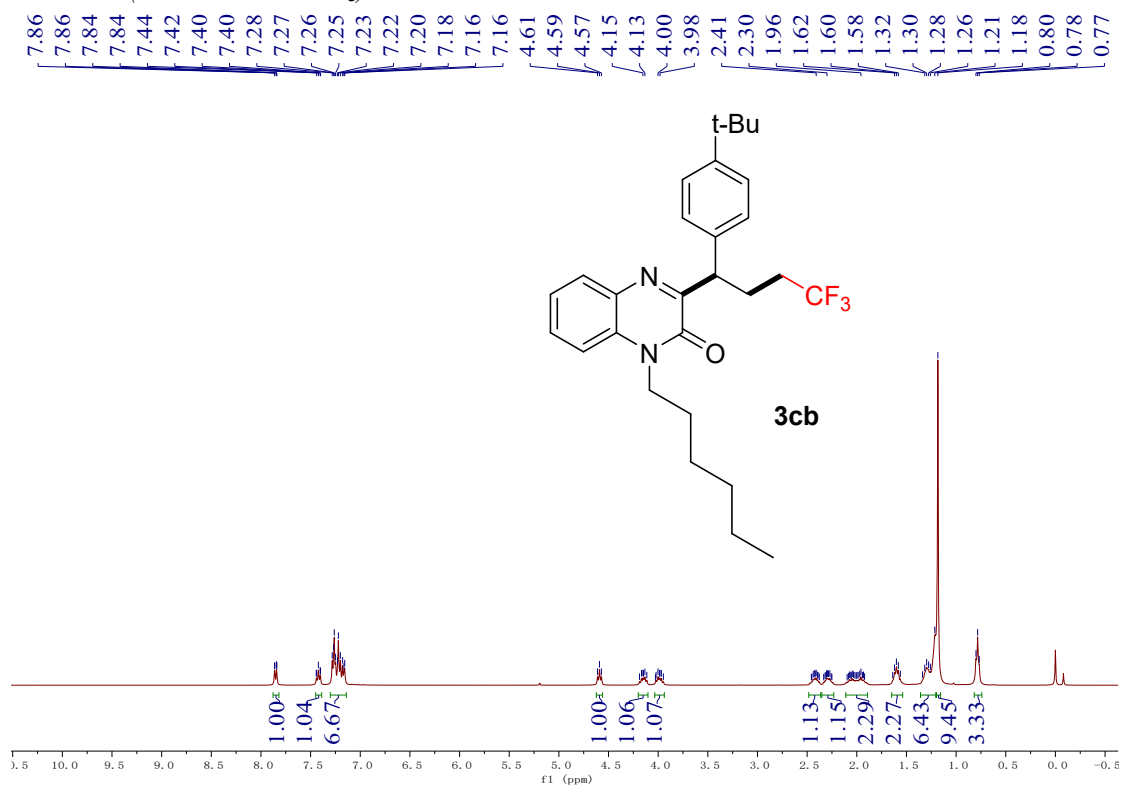

$^{13}\text{C NMR}$  (101 MHz,  $\text{CDCl}_3$ )

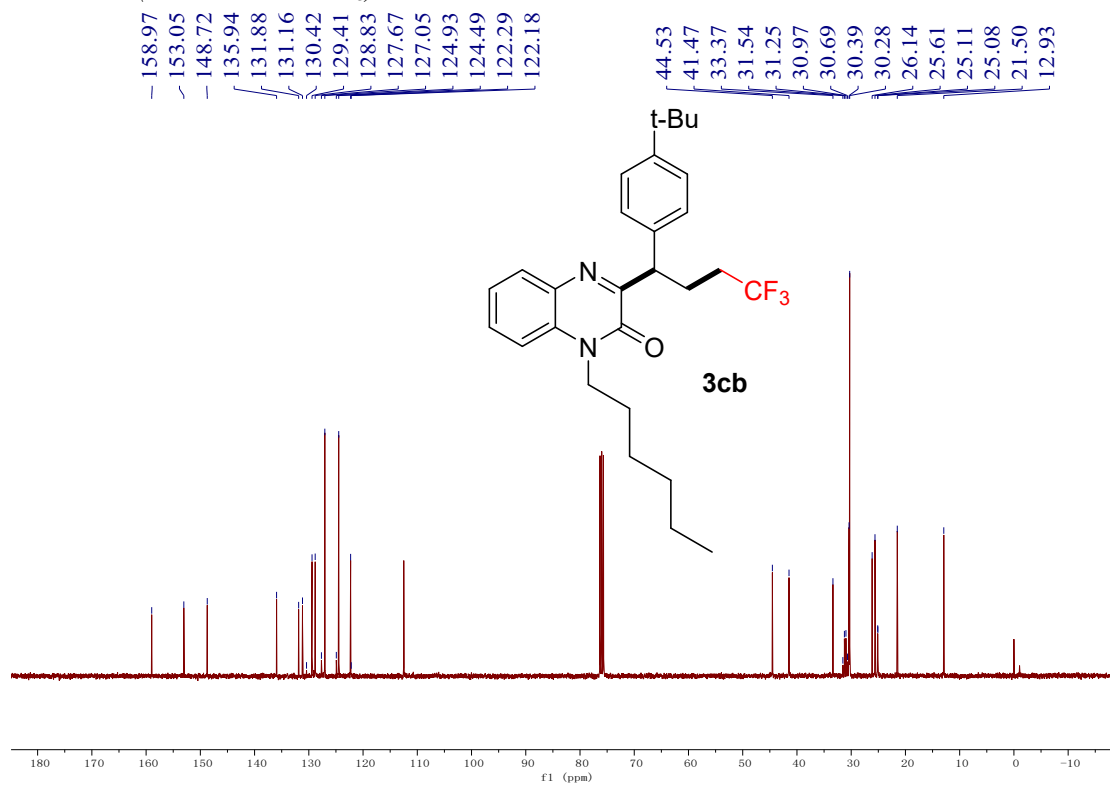

$^{19}\text{F}$  NMR (377 MHz,  $\text{CDCl}_3$ )

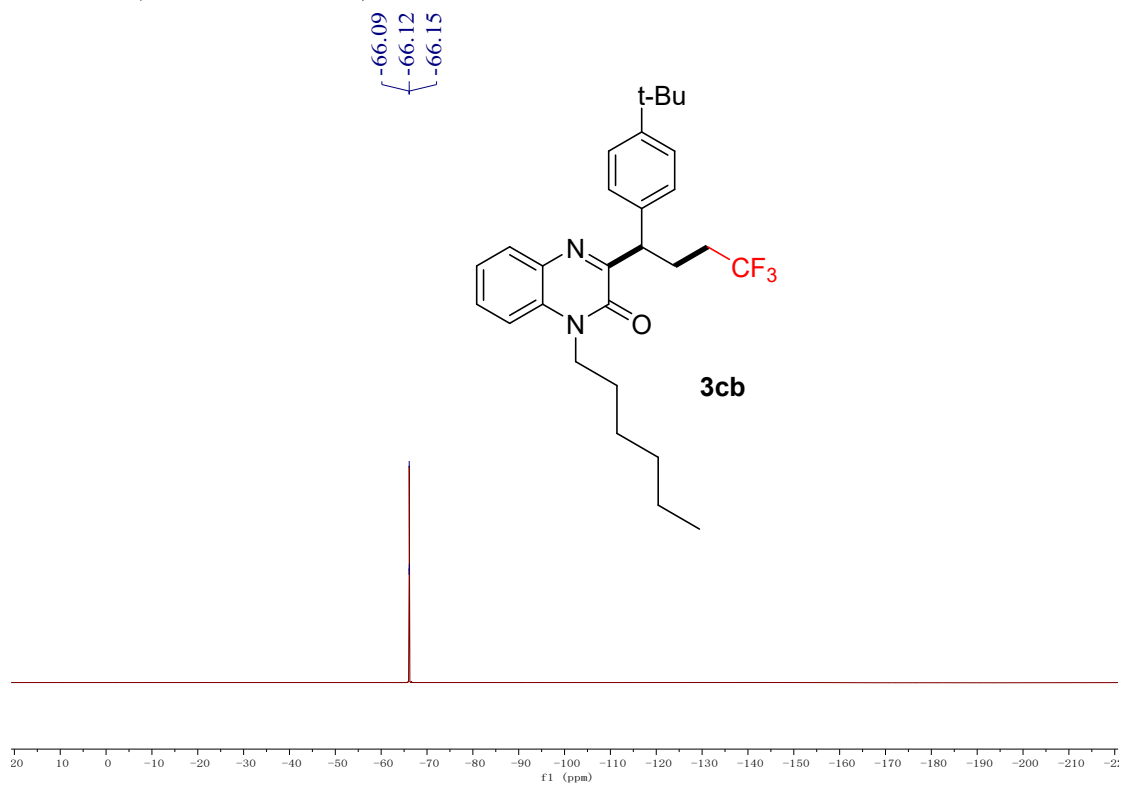

$^1\text{H}$  NMR (400 MHz,  $\text{CDCl}_3$ )

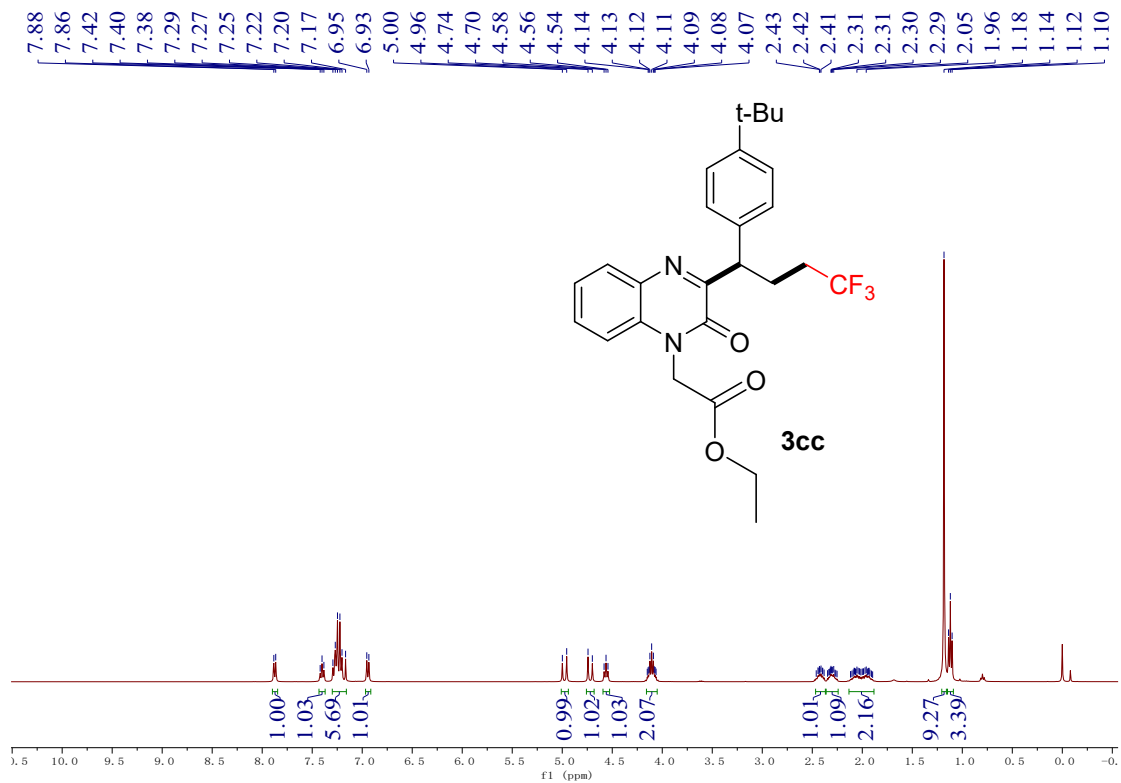

$^{13}\text{C}$  NMR (101 MHz,  $\text{CDCl}_3$ )

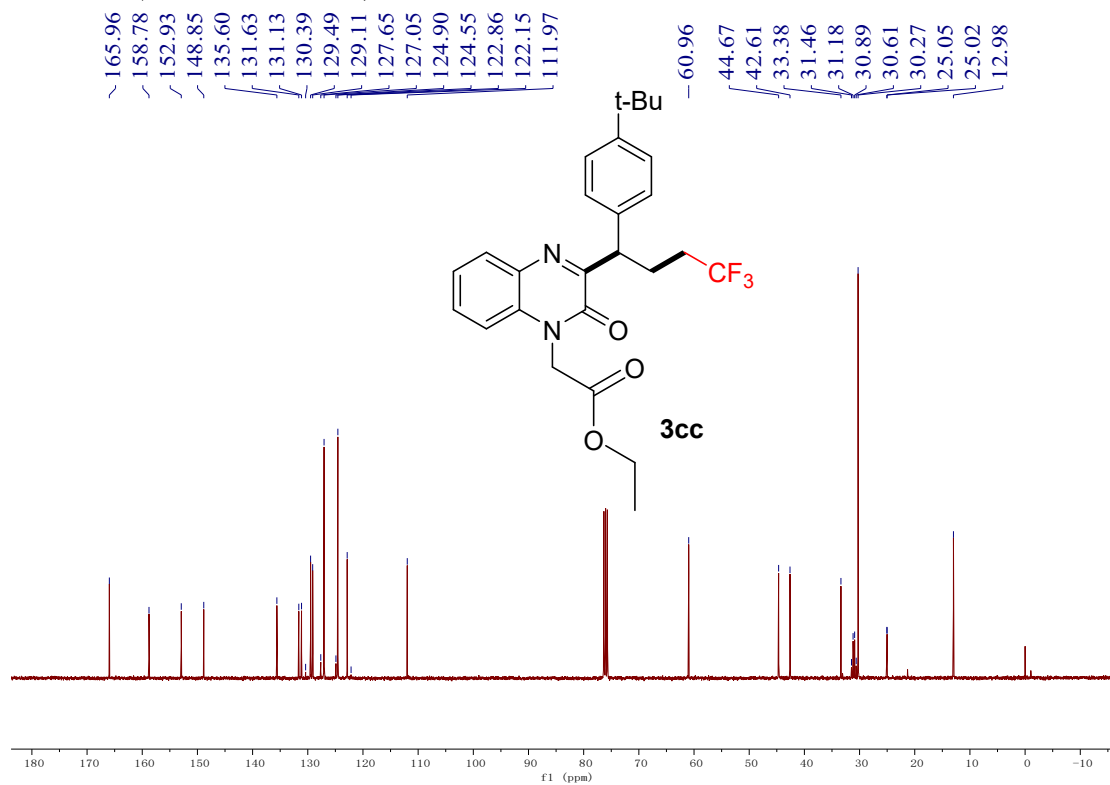

$^{19}\text{F}$  NMR (377 MHz,  $\text{CDCl}_3$ )

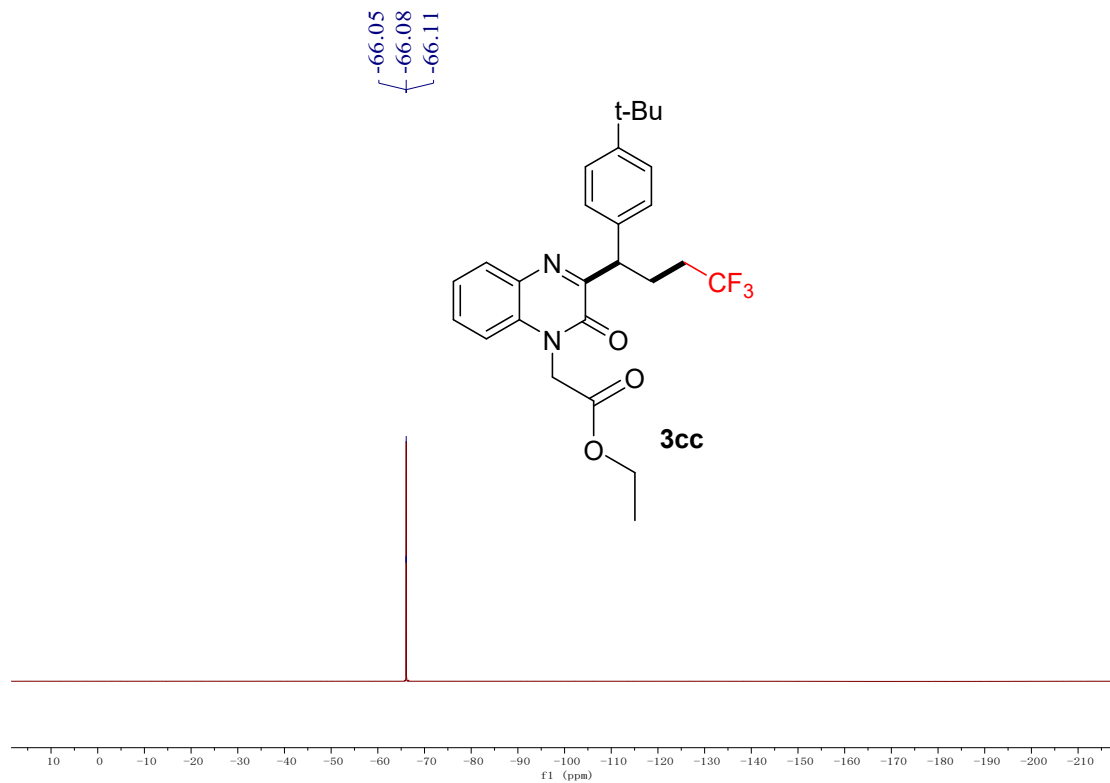

$^1\text{H NMR}$  (400 MHz,  $\text{CDCl}_3$ )

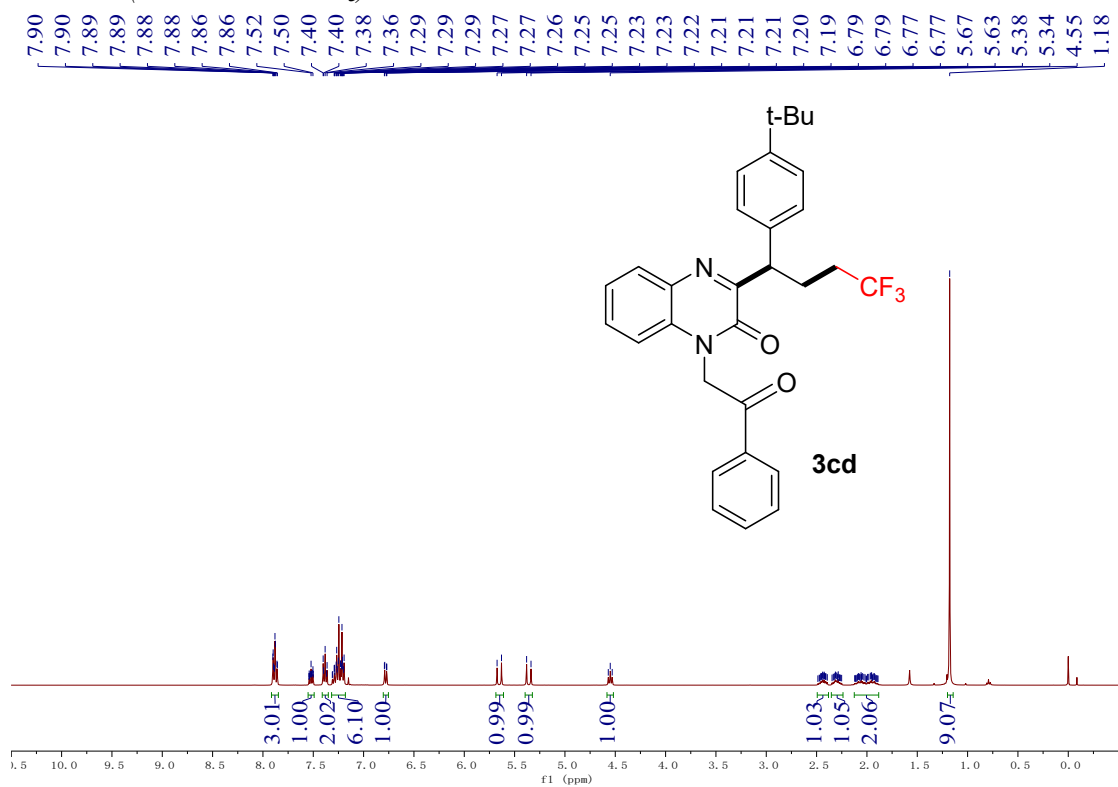

$^{13}\text{C NMR}$  (101 MHz,  $\text{CDCl}_3$ )

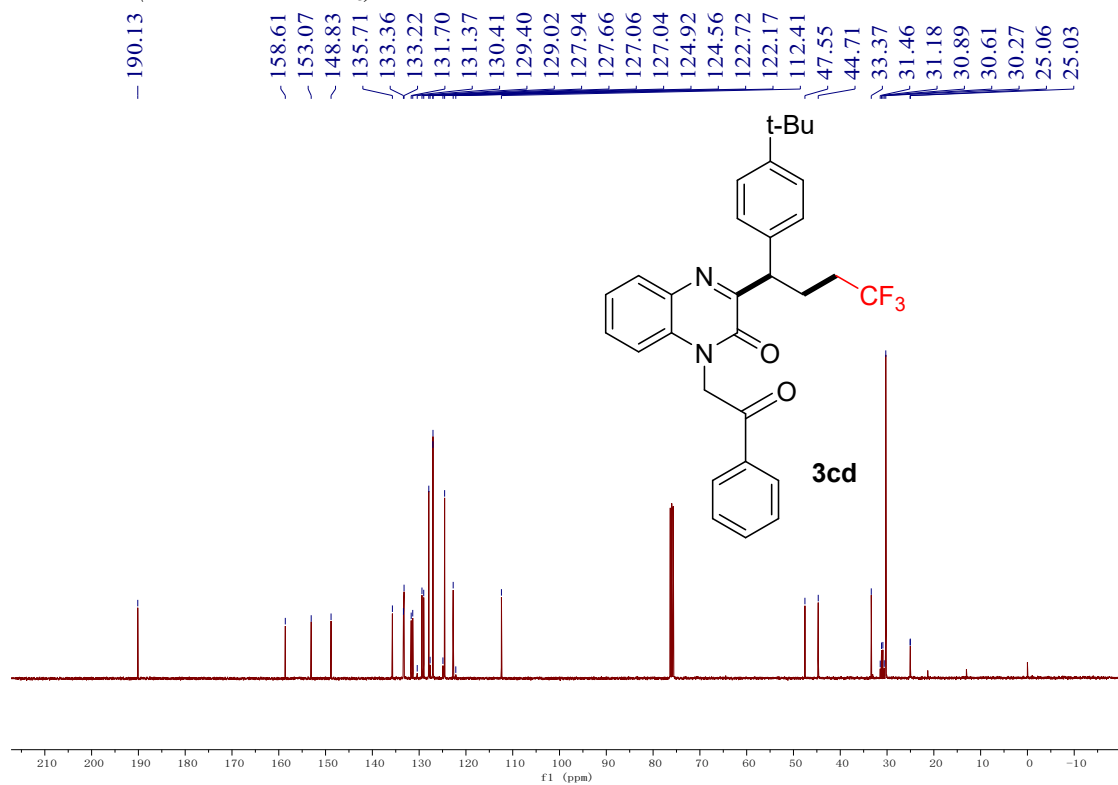

$^{19}\text{F}$  NMR (377 MHz,  $\text{CDCl}_3$ )

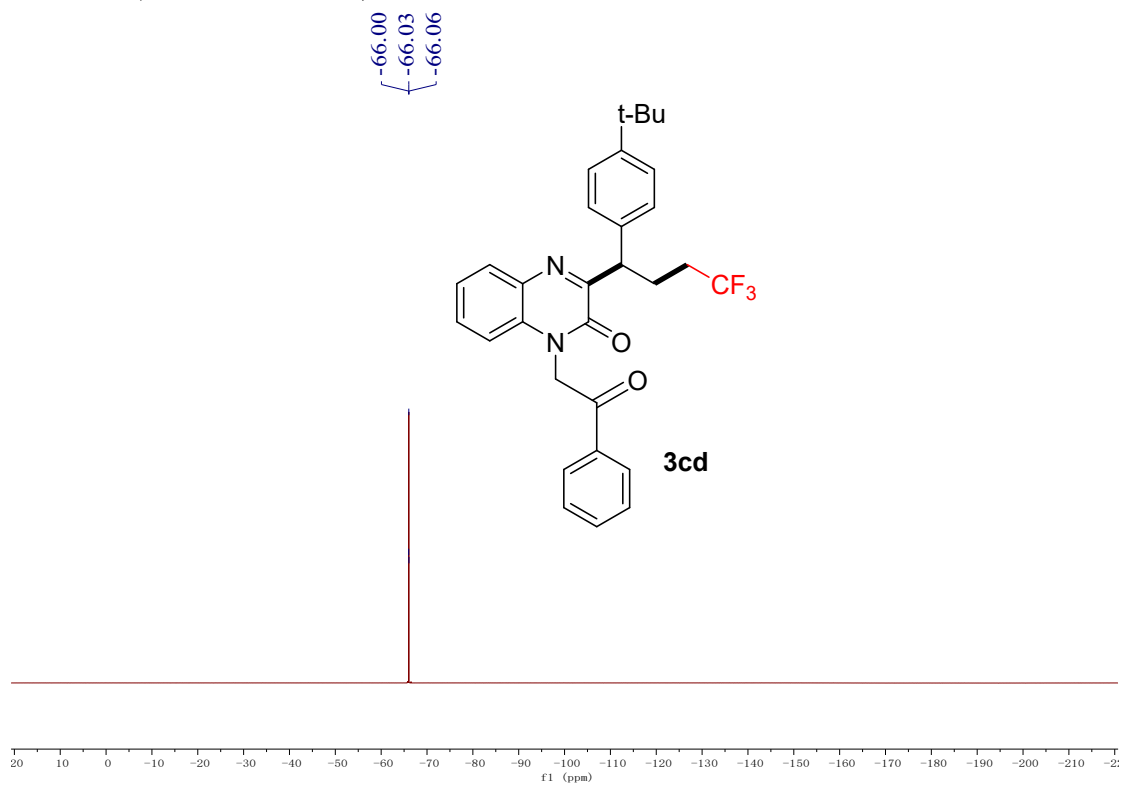

$^1\text{H}$  NMR (400 MHz,  $\text{CDCl}_3$ )

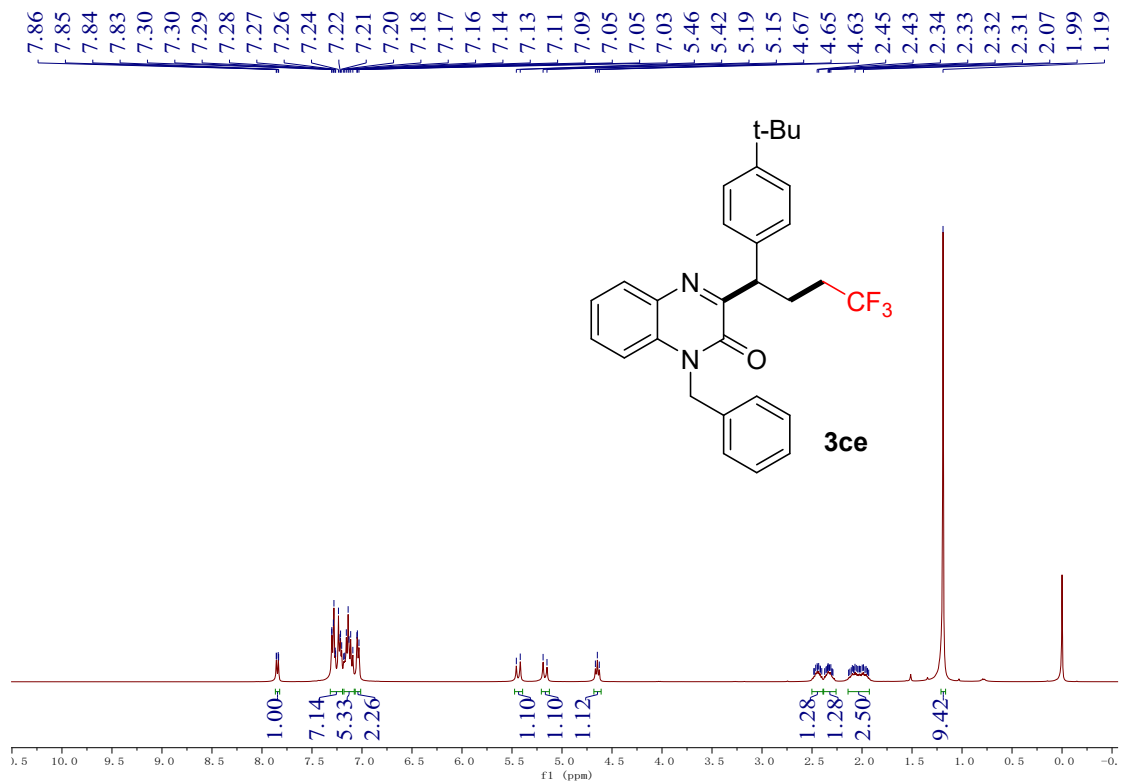



$^{13}\text{C}$  NMR (101 MHz,  $\text{CDCl}_3$ )

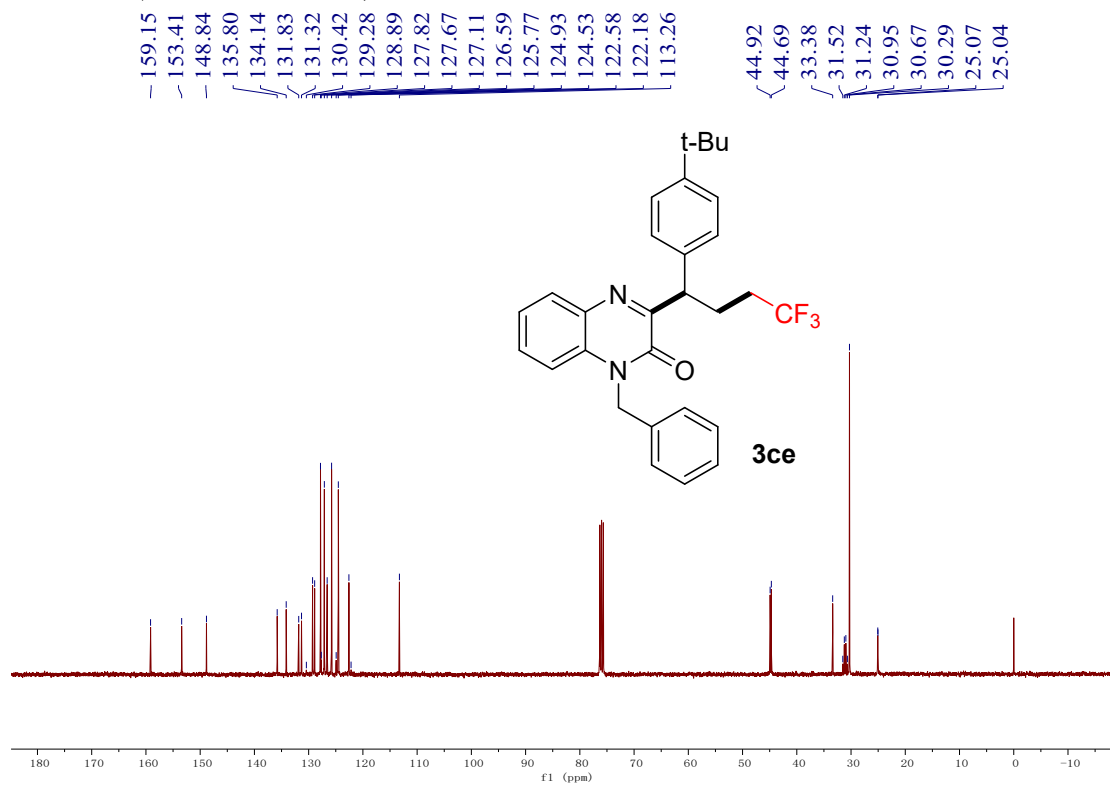

$^{19}\text{F}$  NMR (377 MHz,  $\text{CDCl}_3$ )

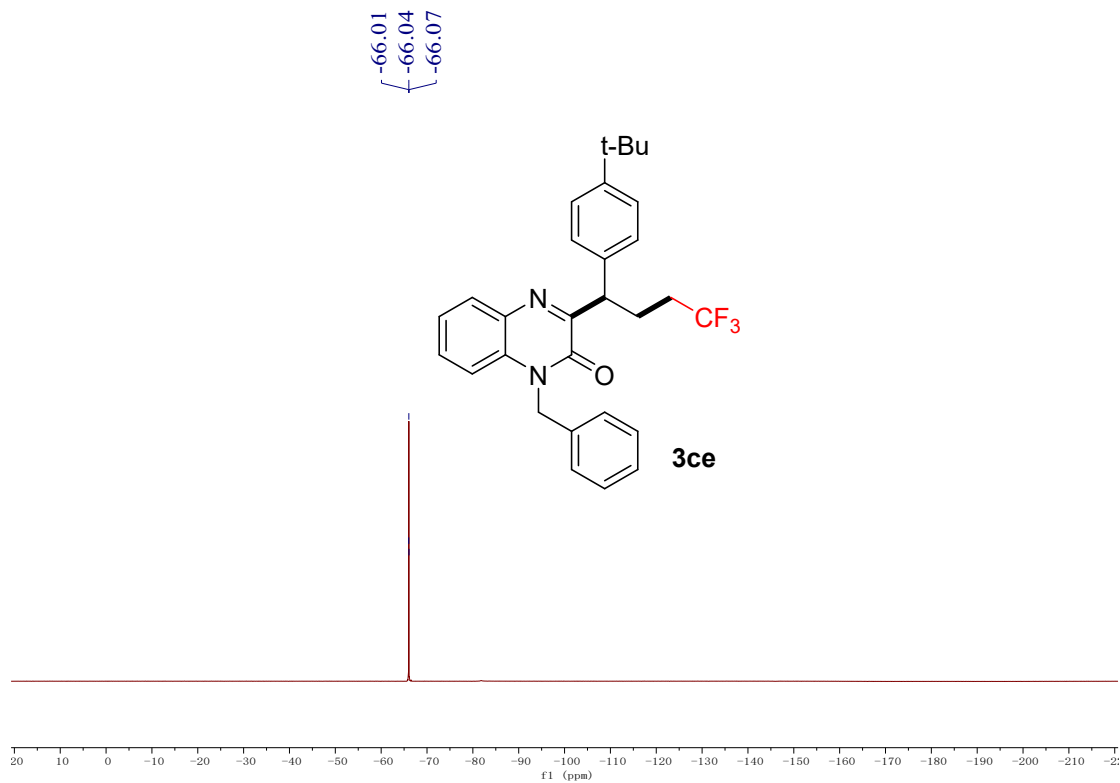

$^1\text{H NMR}$  (400 MHz,  $\text{CDCl}_3$ )

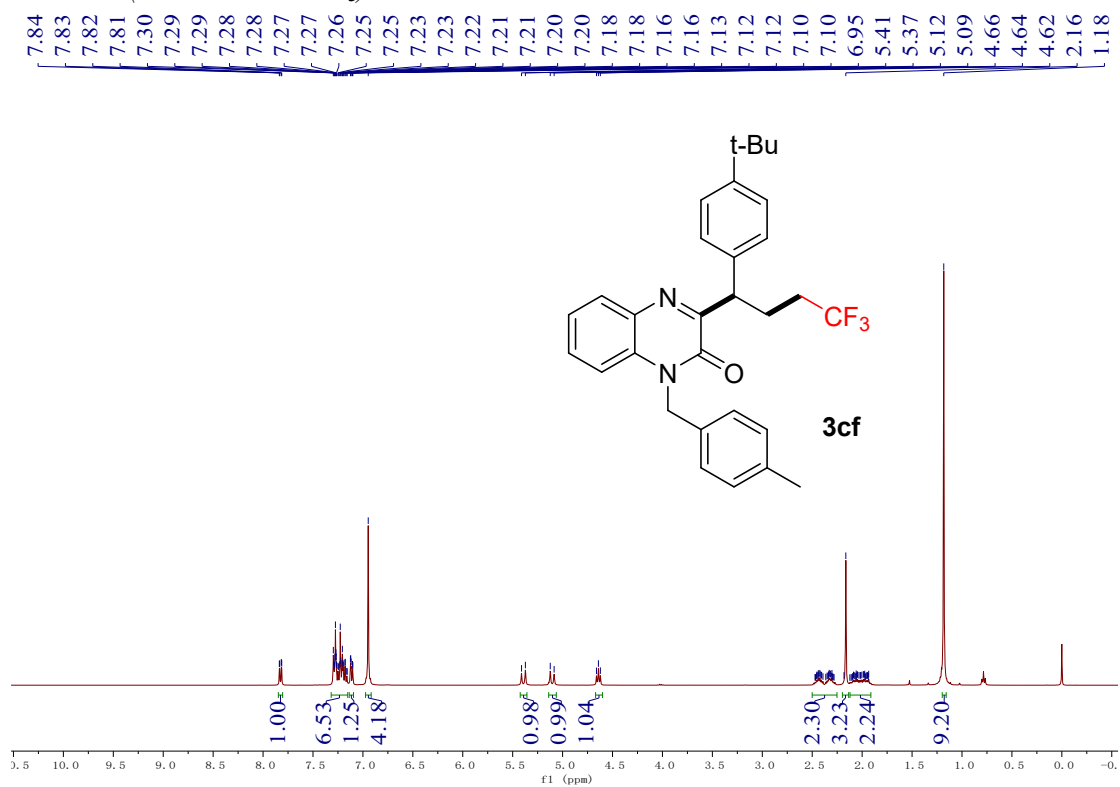

$^{13}\text{C NMR}$  (101 MHz,  $\text{CDCl}_3$ )

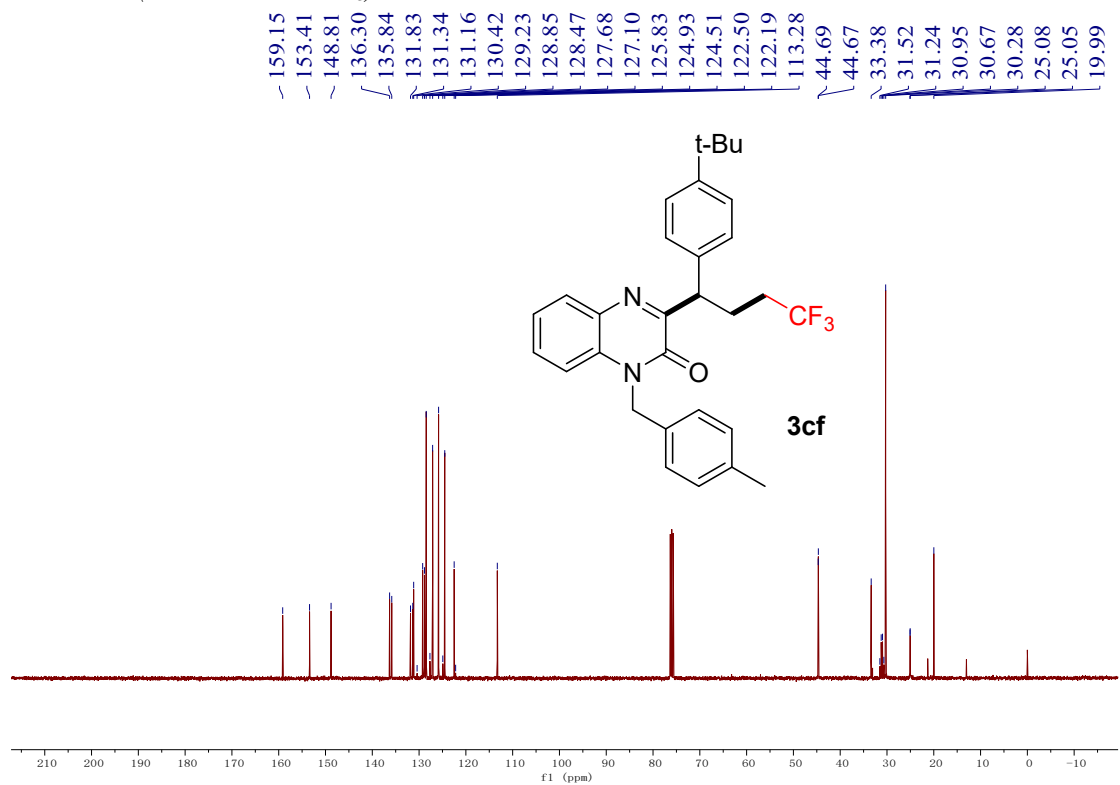

$^{19}\text{F}$  NMR (377 MHz,  $\text{CDCl}_3$ )

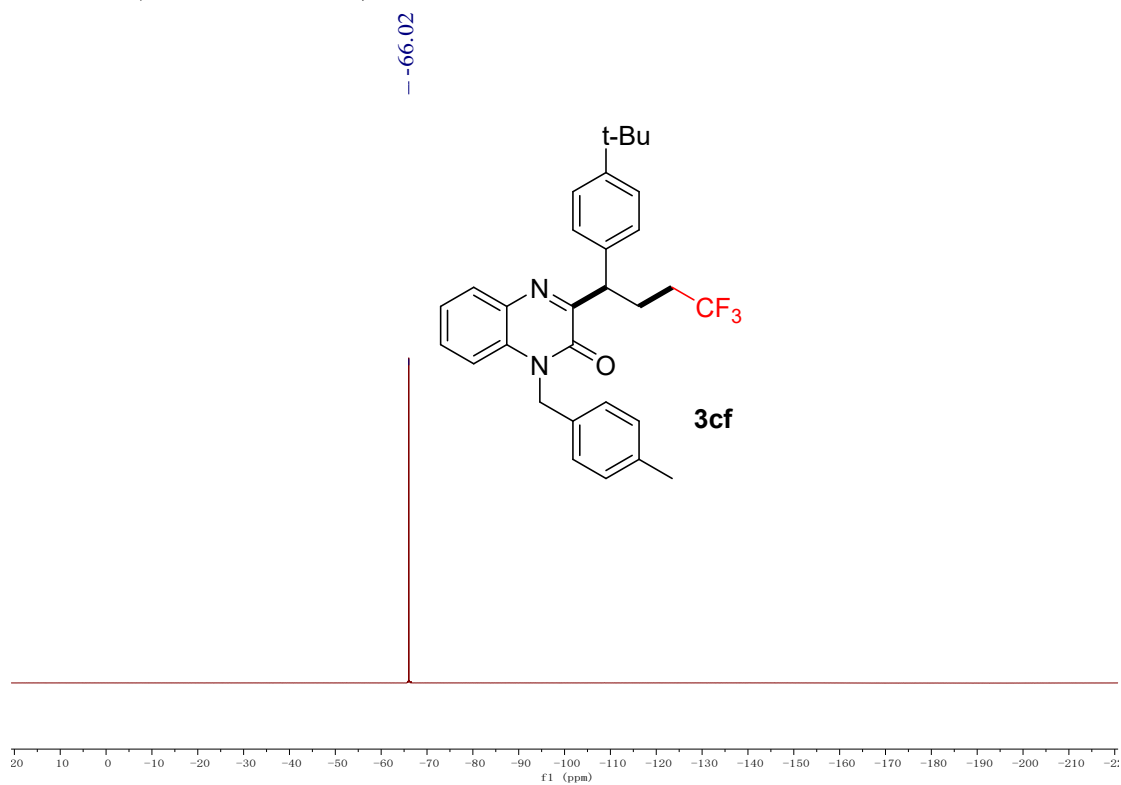

$^1\text{H}$  NMR (400 MHz,  $\text{CDCl}_3$ )

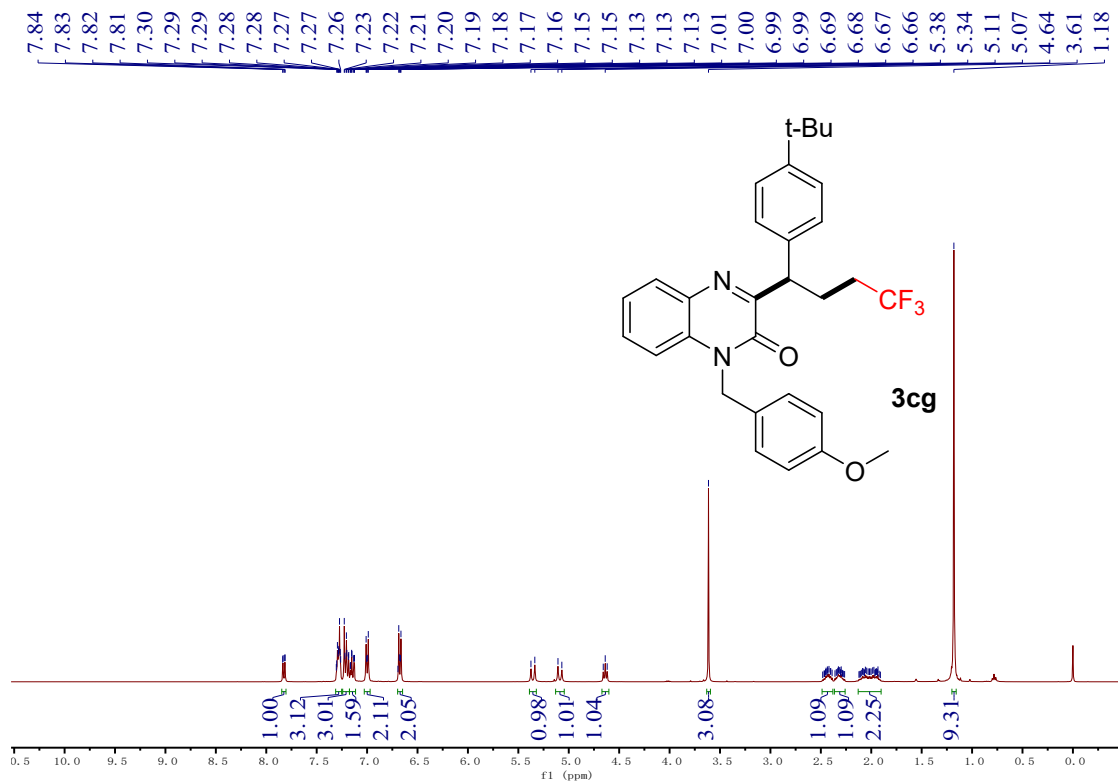

$^{13}\text{C}$  NMR (101 MHz,  $\text{CDCl}_3$ )

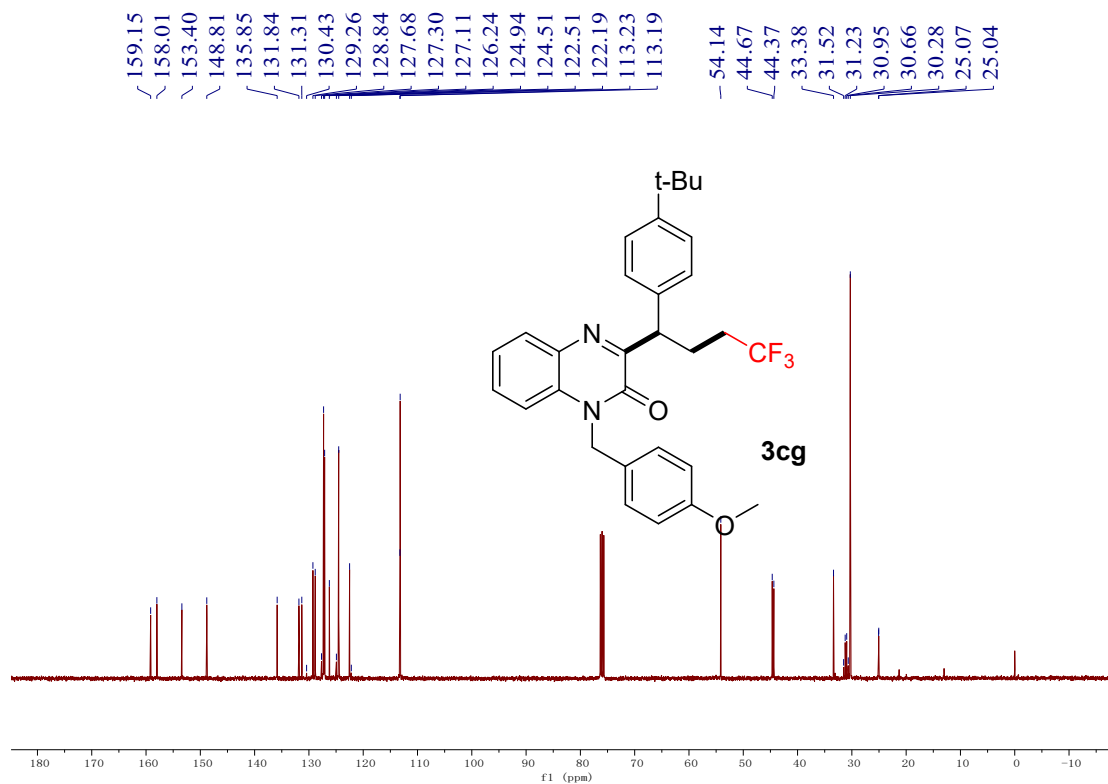

$^{19}\text{F}$  NMR (377 MHz,  $\text{CDCl}_3$ )

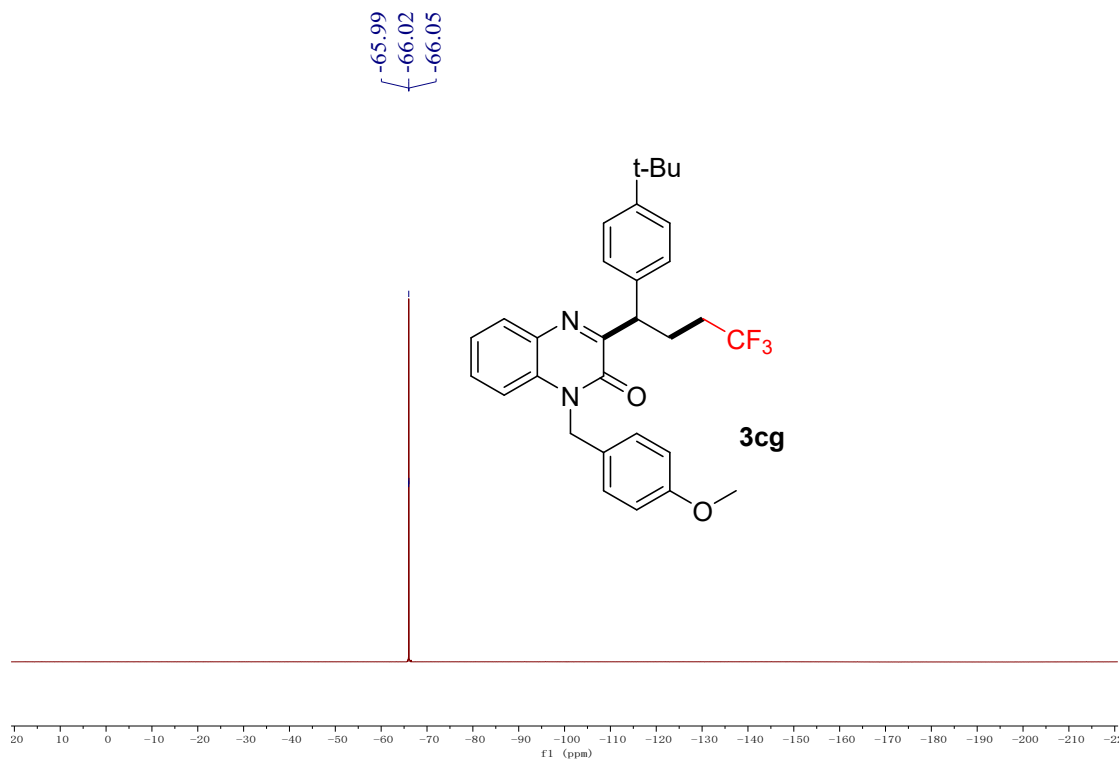

$^1\text{H NMR}$  (400 MHz,  $\text{CDCl}_3$ )

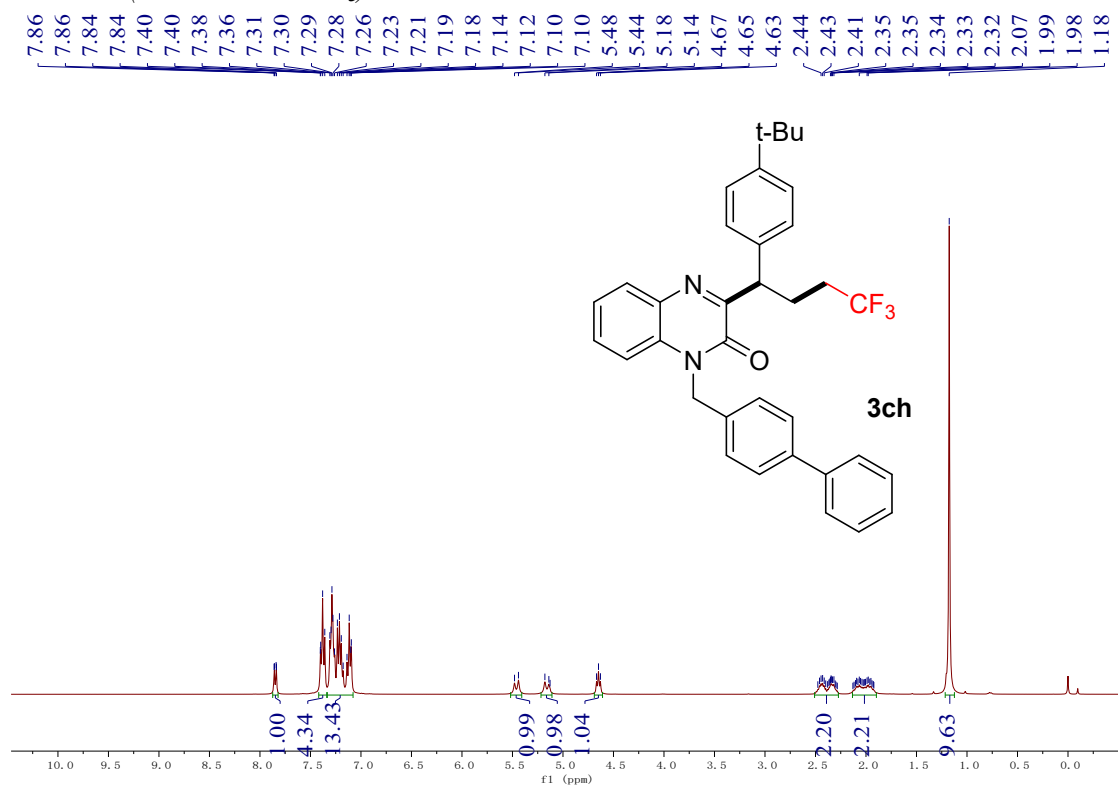

$^{13}\text{C NMR}$  (101 MHz,  $\text{CDCl}_3$ )

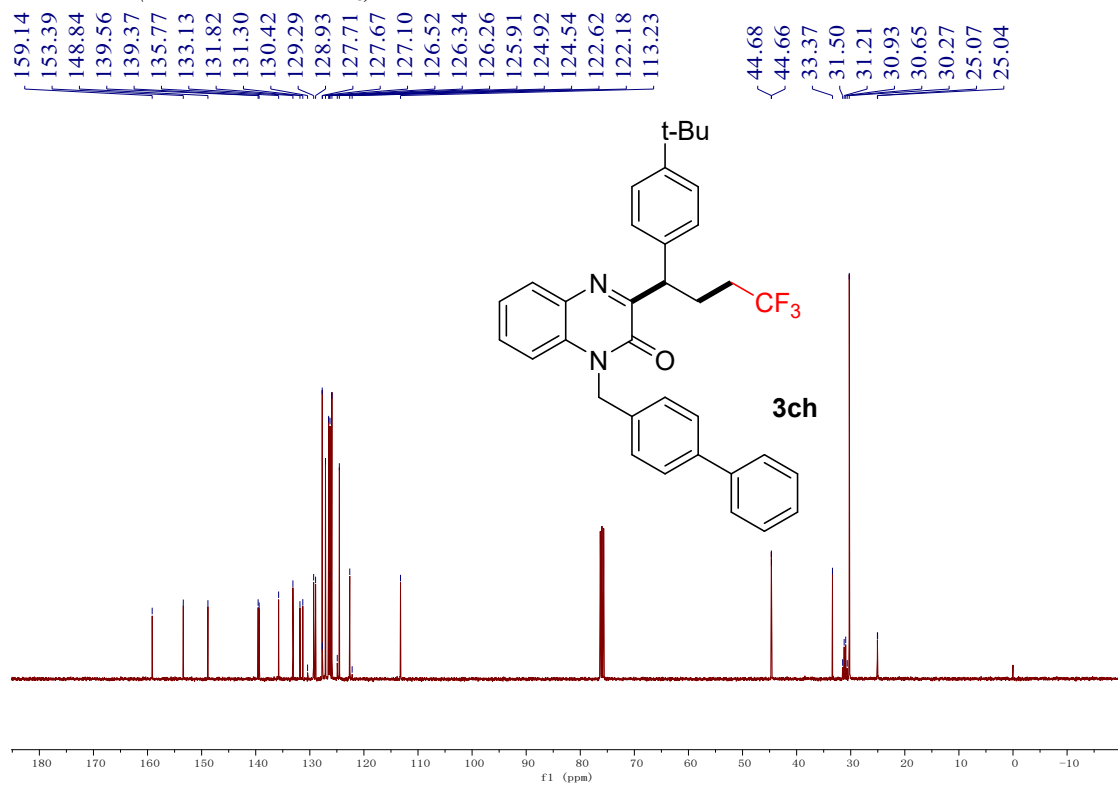

$^{19}\text{F}$  NMR (377 MHz,  $\text{CDCl}_3$ )

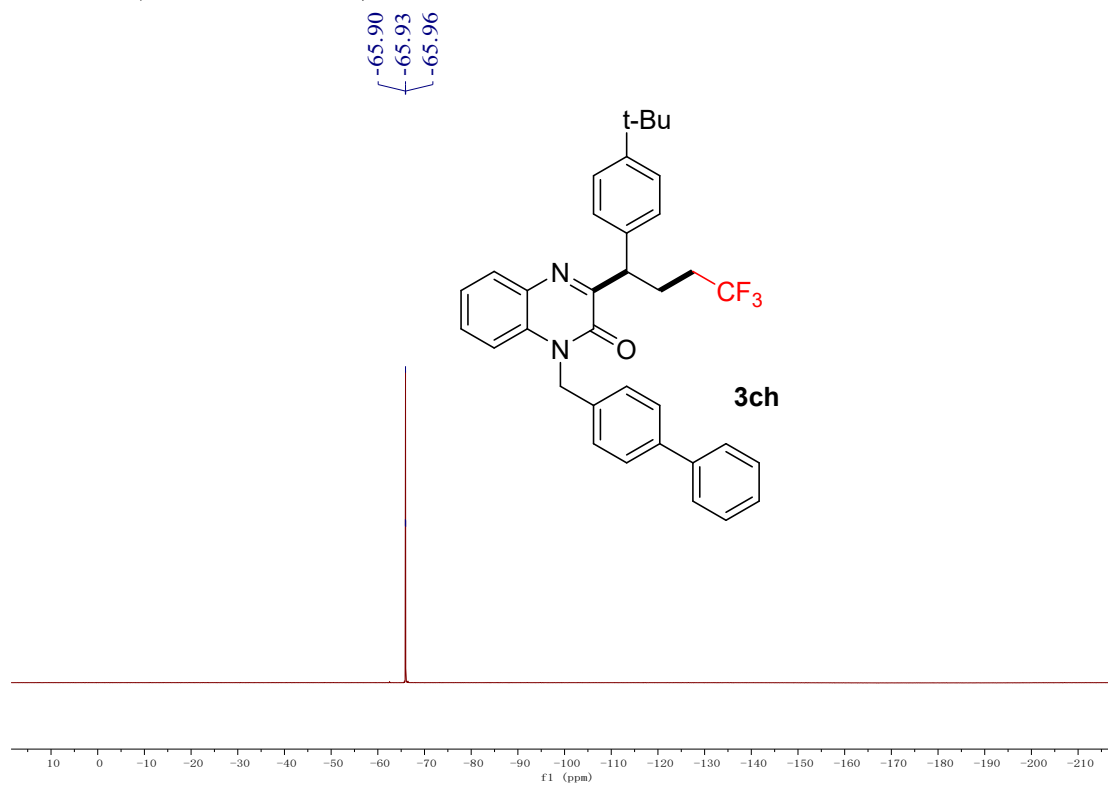

$^1\text{H}$  NMR (400 MHz,  $\text{CDCl}_3$ )

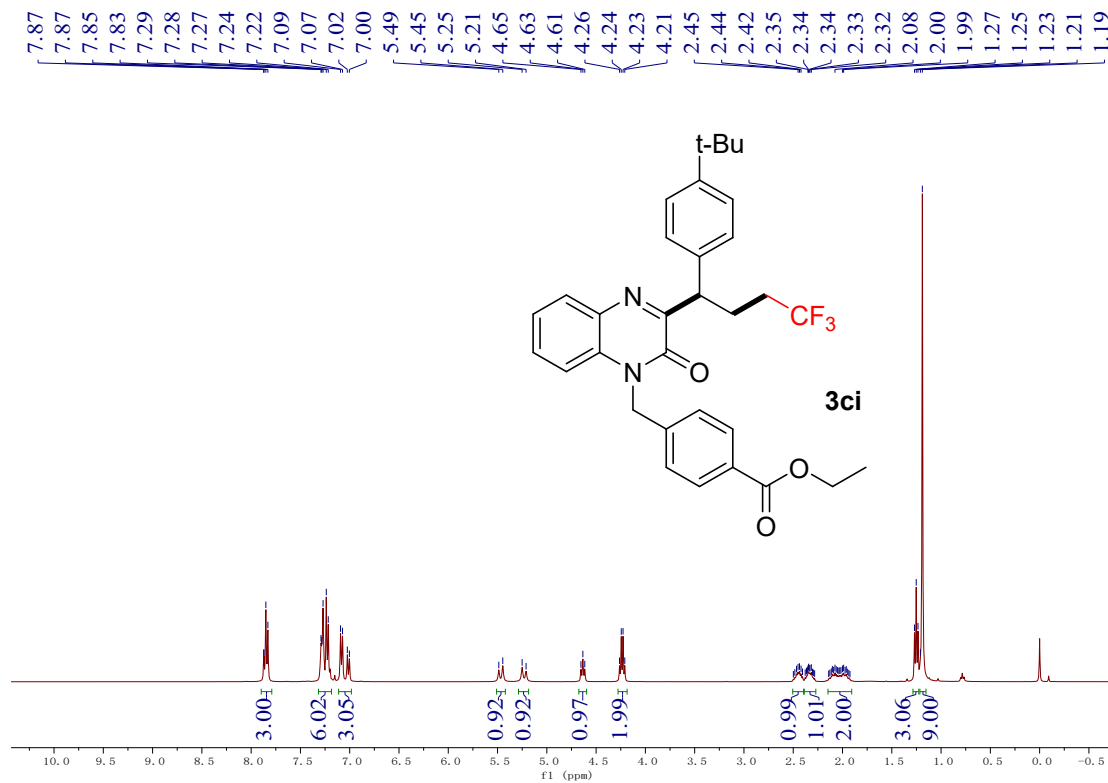

$^{13}\text{C}$  NMR (101 MHz,  $\text{CDCl}_3$ )

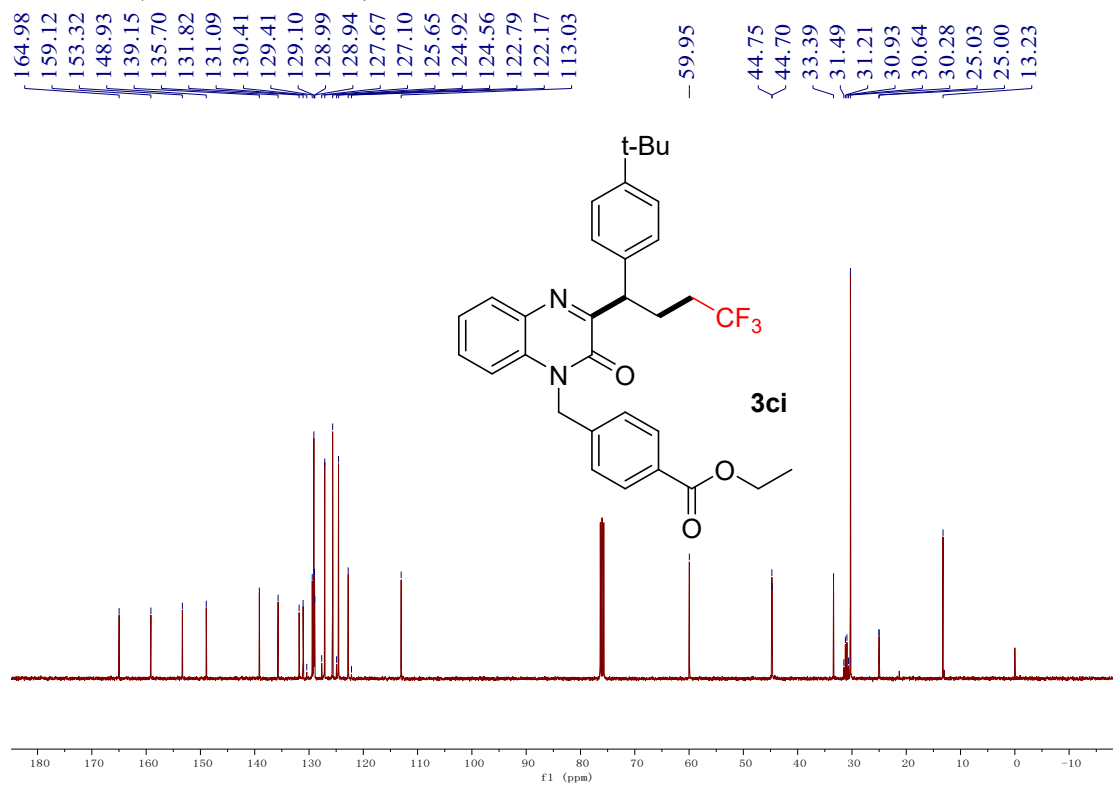

$^{19}\text{F}$  NMR (377 MHz,  $\text{CDCl}_3$ )

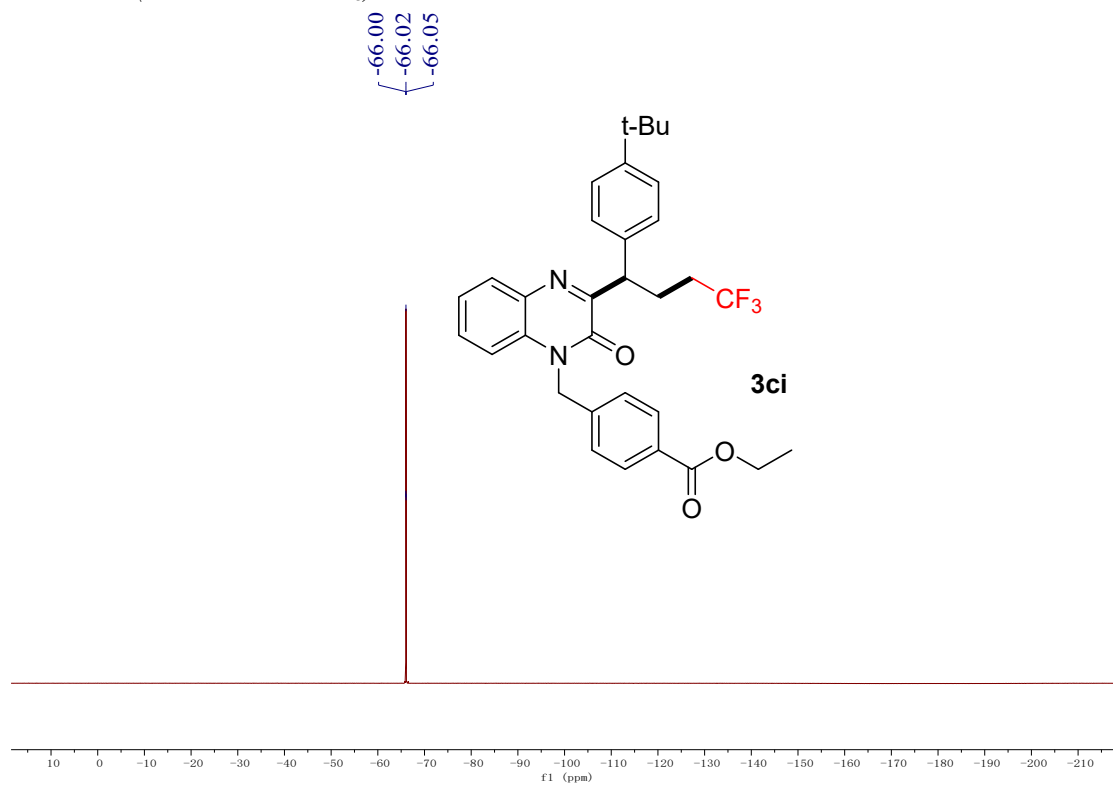

$^1\text{H NMR}$  (400 MHz,  $\text{CDCl}_3$ )

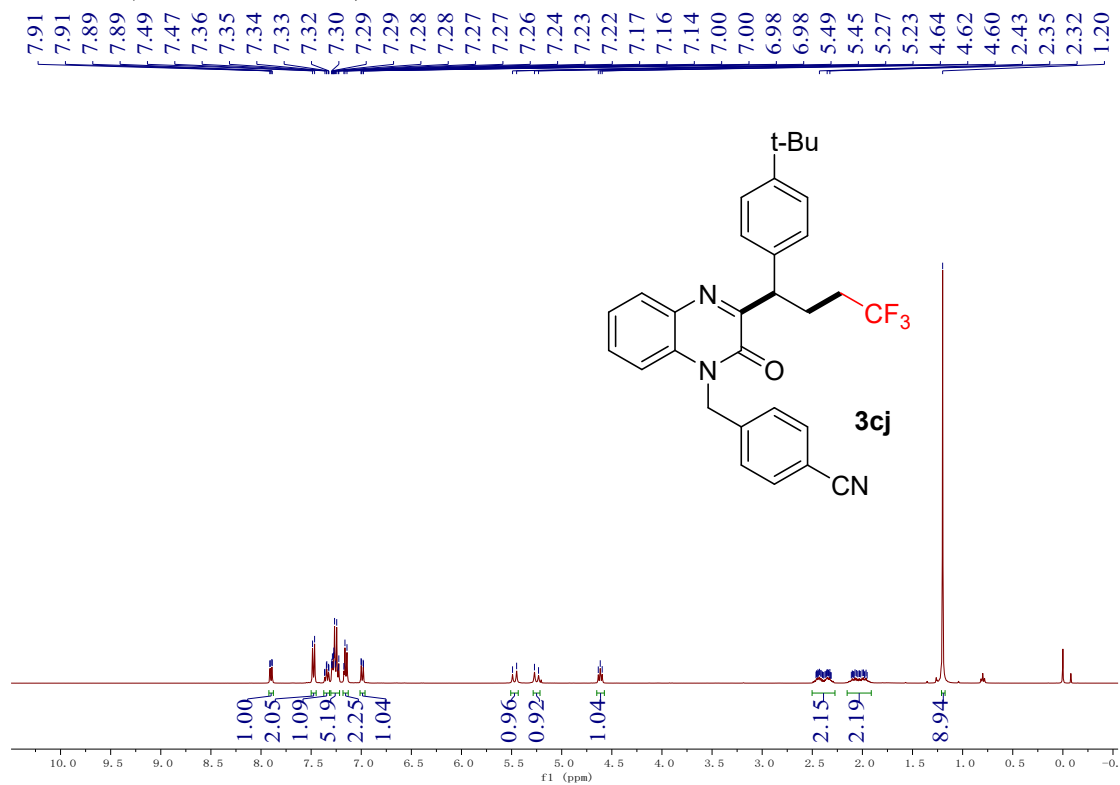

$^{13}\text{C NMR}$  (101 MHz,  $\text{CDCl}_3$ )

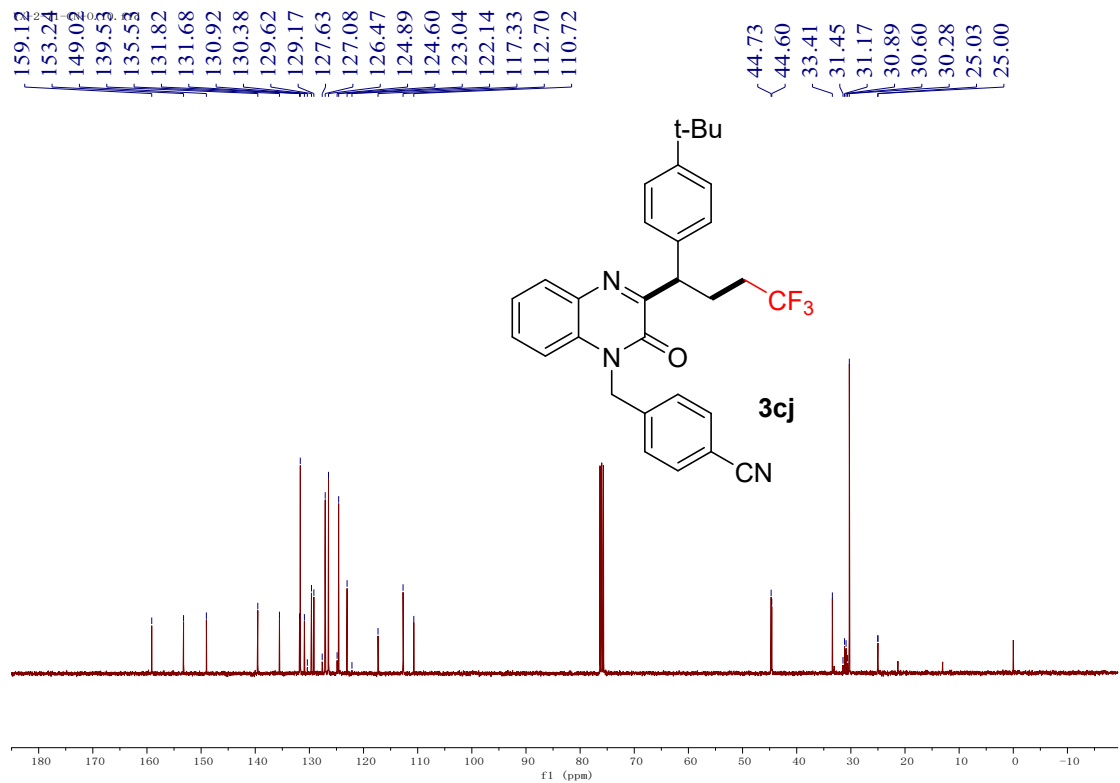



$^{19}\text{F}$  NMR (377 MHz,  $\text{CDCl}_3$ )

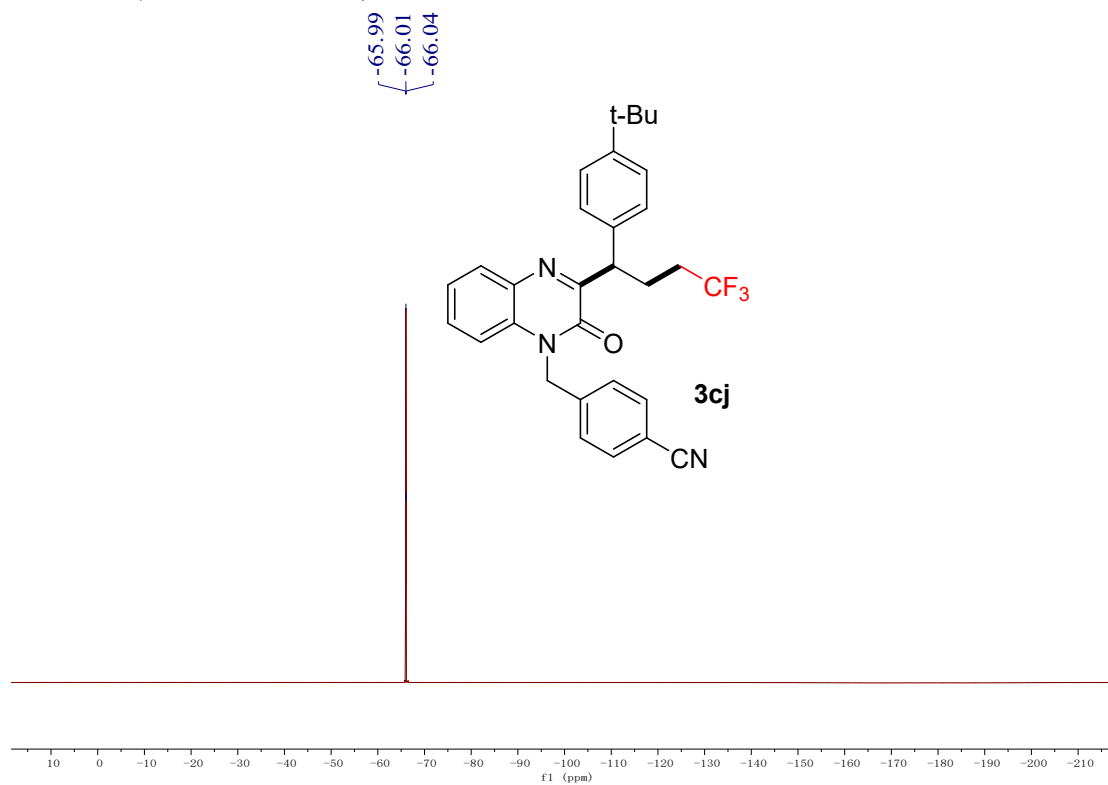

$^1\text{H}$  NMR (400 MHz,  $\text{CDCl}_3$ )

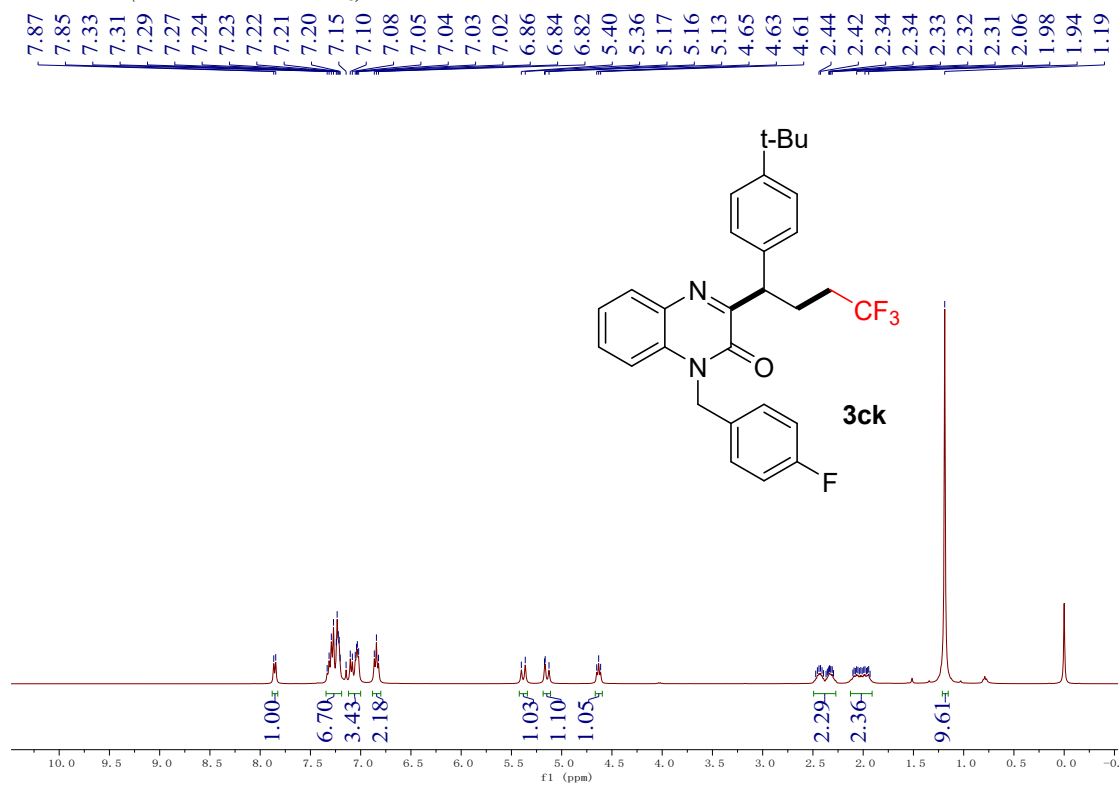

$^{13}\text{C}$  NMR (101 MHz,  $\text{CDCl}_3$ )

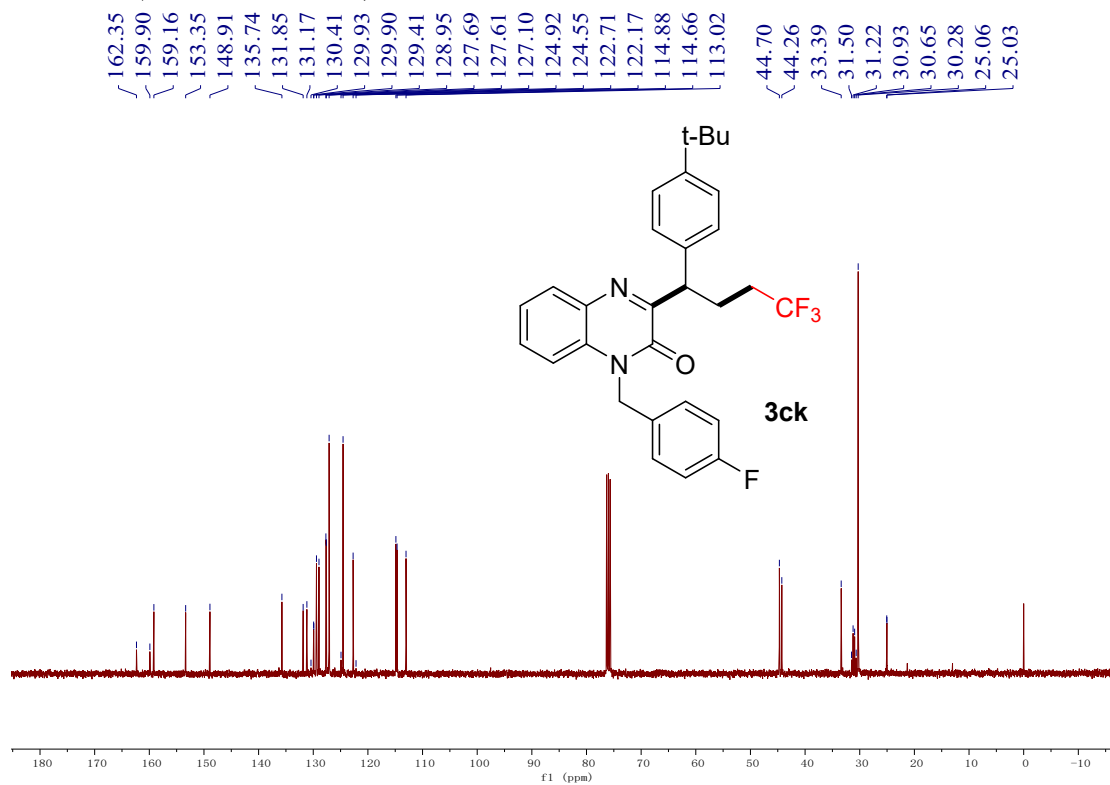

$^{19}\text{F}$  NMR (377 MHz,  $\text{CDCl}_3$ )

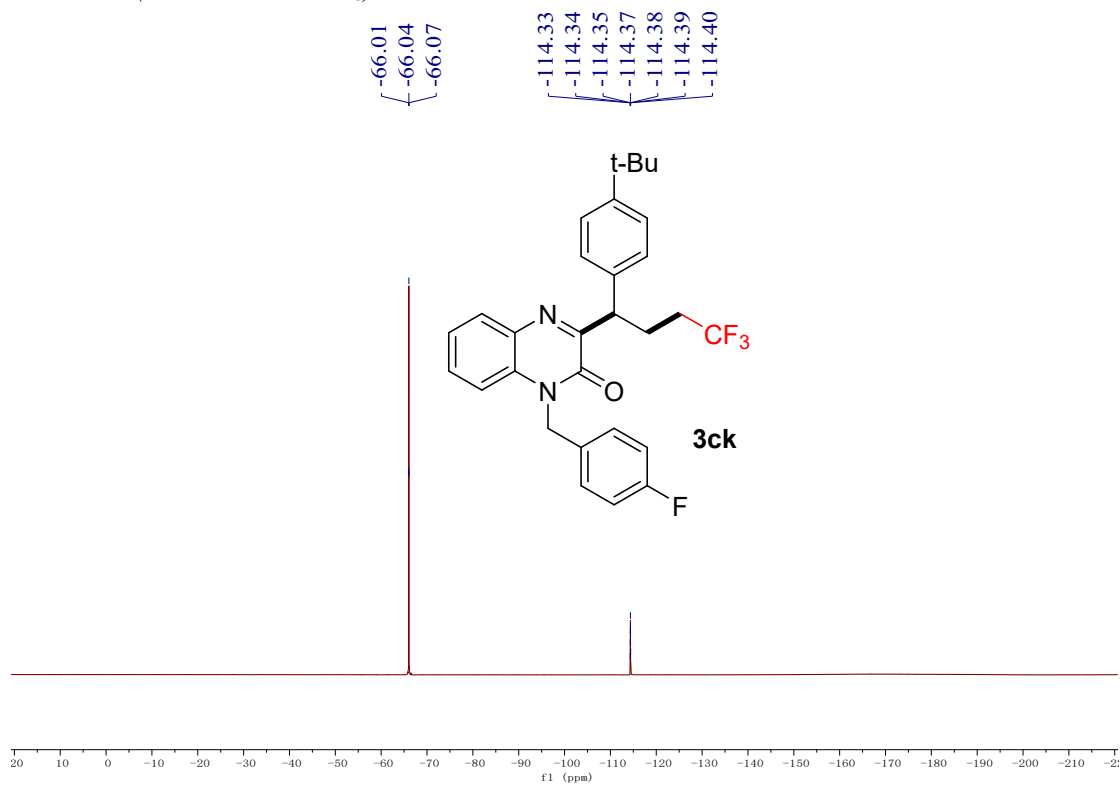

<sup>1</sup>H NMR (400 MHz, CDCl<sub>3</sub>)

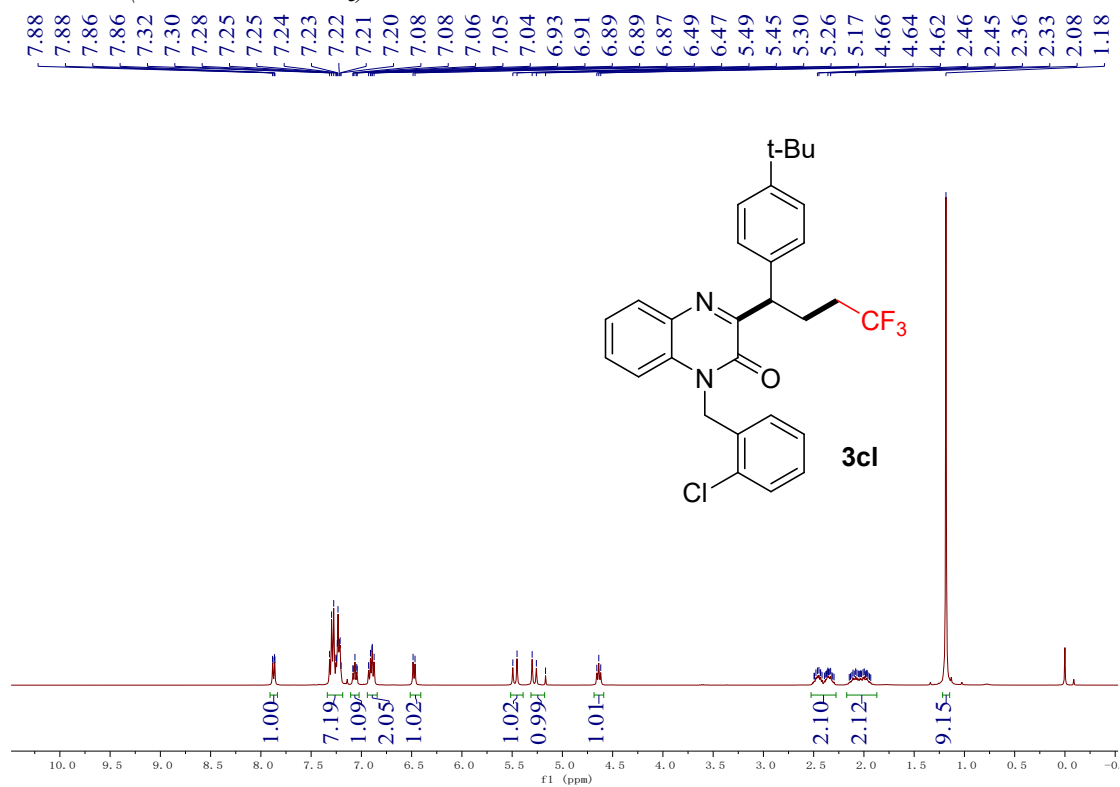

<sup>13</sup>C NMR (101 MHz, CDCl<sub>3</sub>)

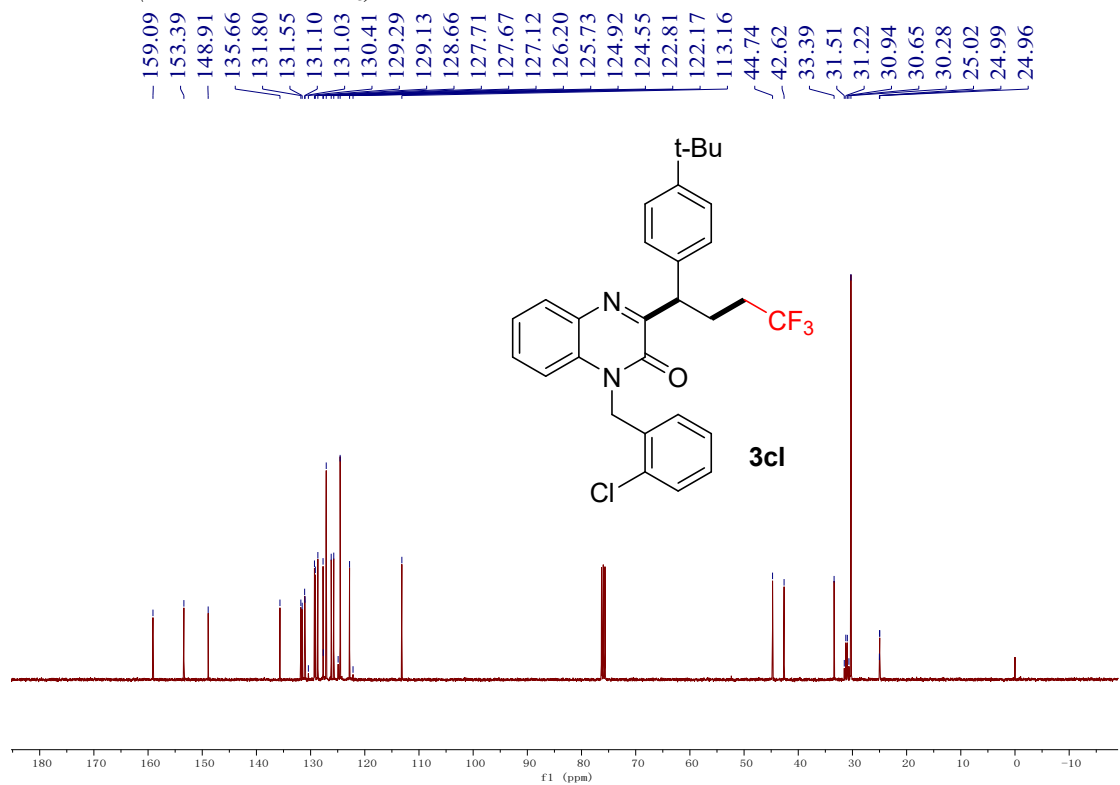

$^{19}\text{F}$  NMR (377 MHz,  $\text{CDCl}_3$ )

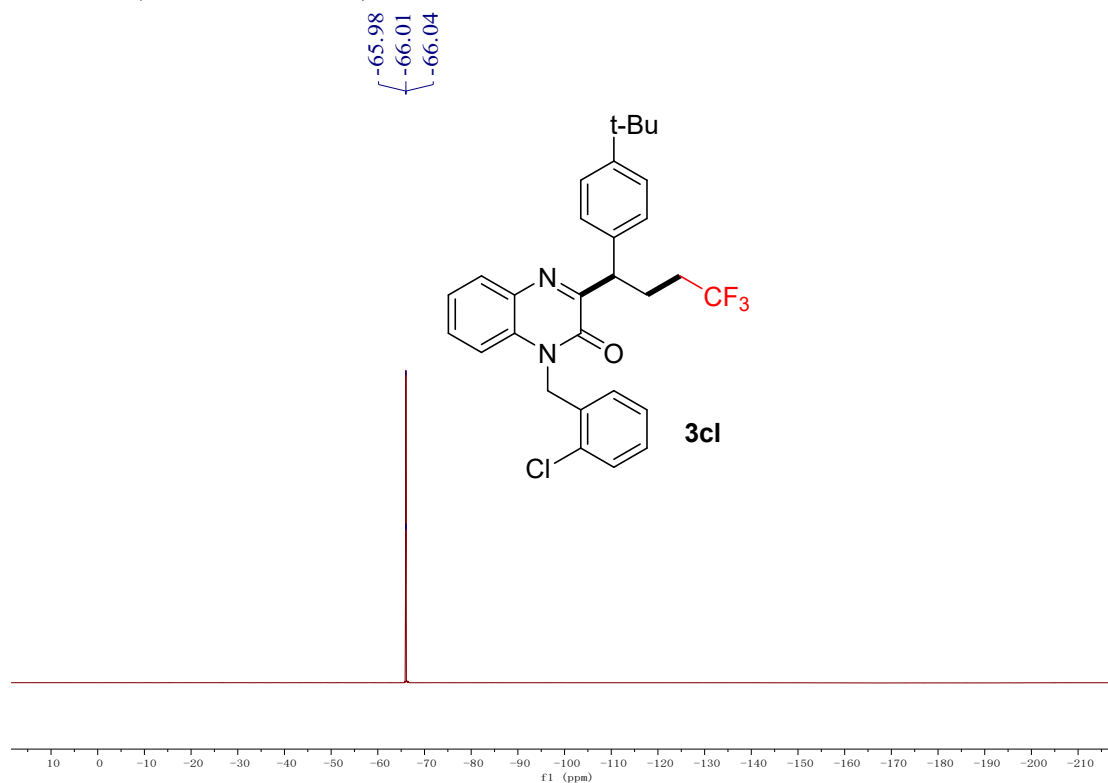

$^1\text{H}$  NMR (400 MHz,  $\text{CDCl}_3$ )

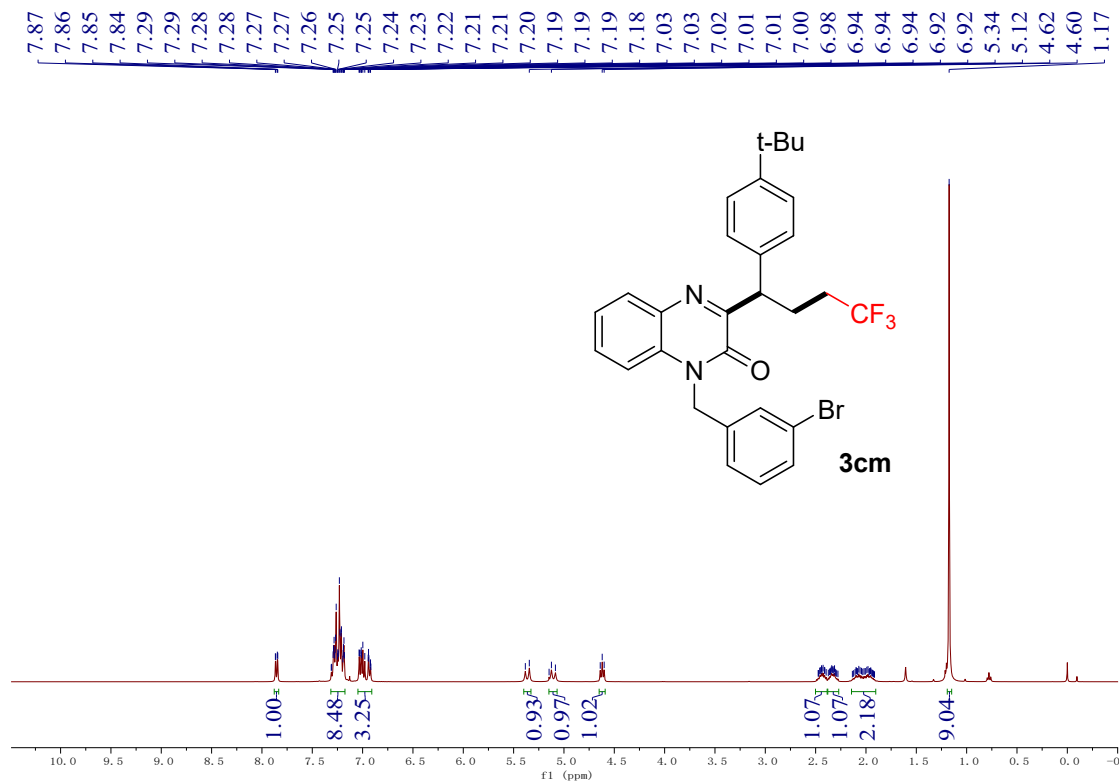

$^{13}\text{C}$  NMR (101 MHz,  $\text{CDCl}_3$ )

-159.08  
-153.26  
-148.88  
-136.45  
-135.67  
-131.77  
-131.04  
-130.40  
-129.83  
-129.39  
-129.36  
-129.04  
-128.77  
-127.66  
-127.05  
-124.91  
-124.57  
-124.37  
-122.79  
-122.16  
-121.92  
-112.95  
44.72  
44.30  
33.37  
31.46  
31.17  
30.89  
30.61  
30.27  
24.99  
24.96  
24.94

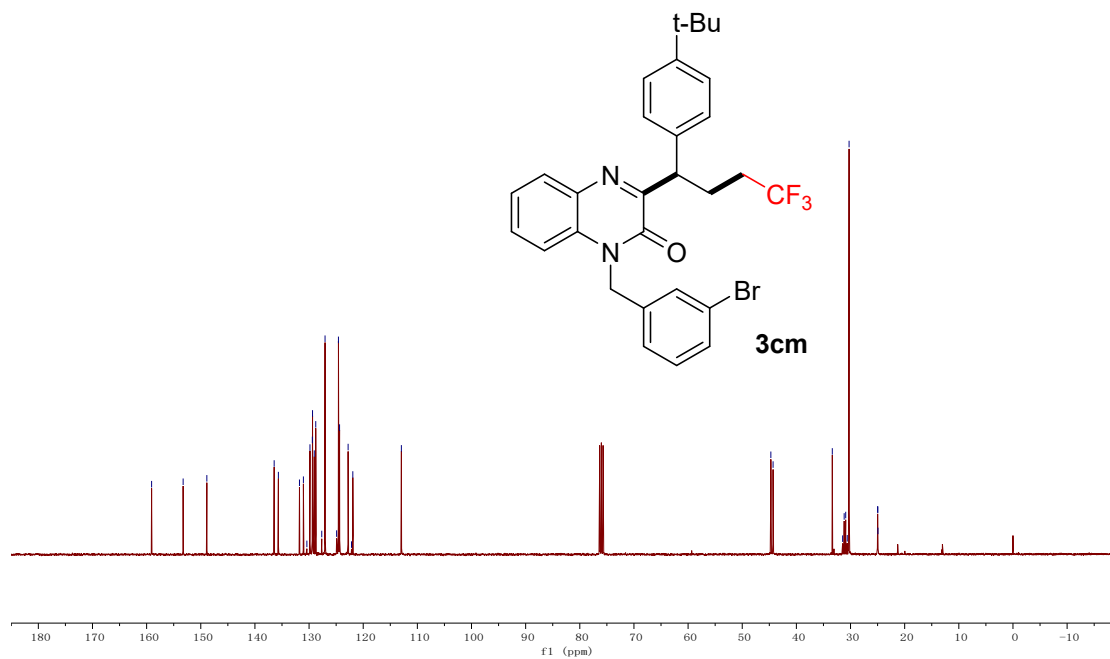

$^{19}\text{F}$  NMR (377 MHz,  $\text{CDCl}_3$ )

-65.93  
-65.95  
-65.98

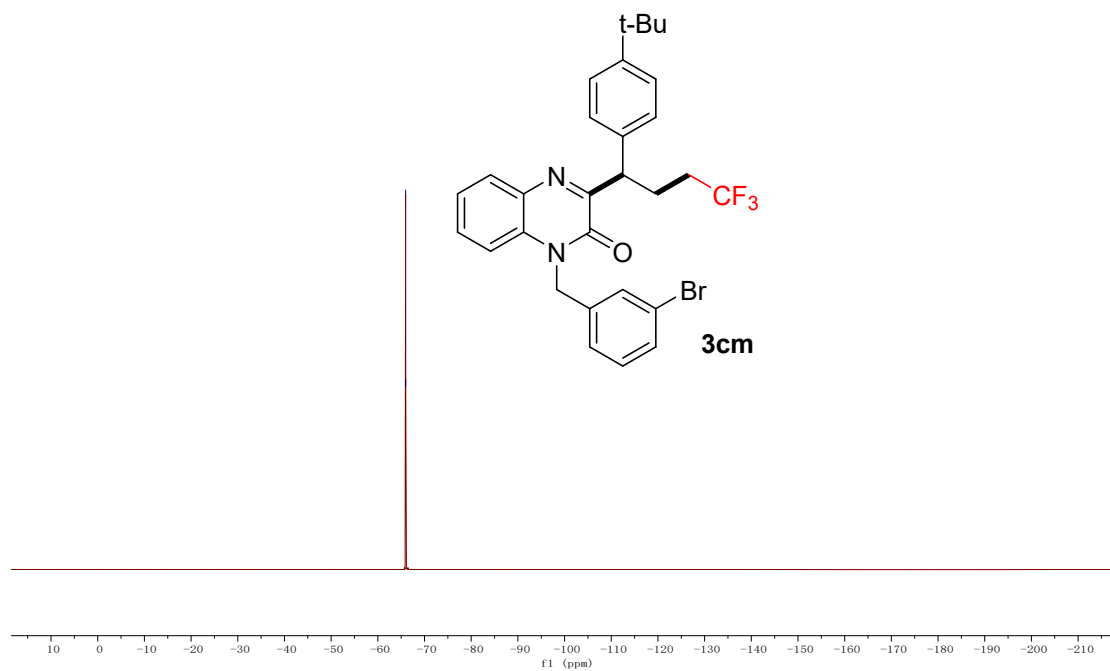

$^1\text{H NMR}$  (400 MHz,  $\text{CDCl}_3$ )

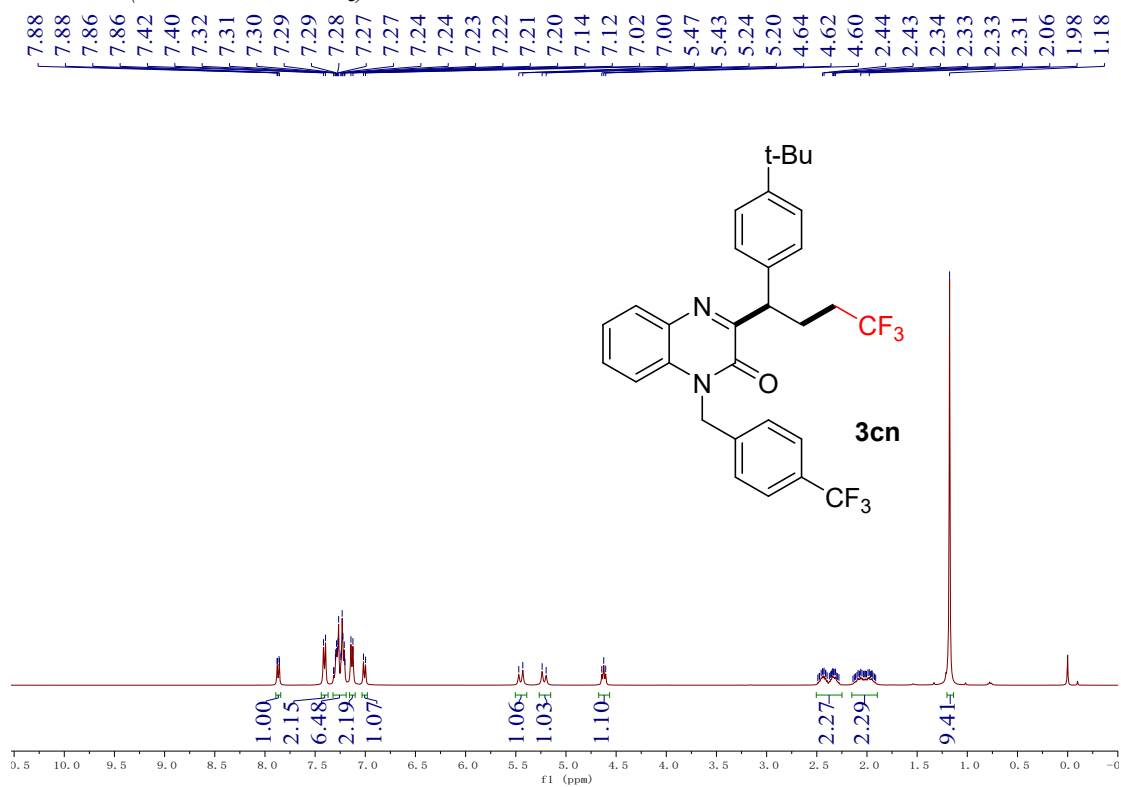

$^{13}\text{C NMR}$  (101 MHz,  $\text{CDCl}_3$ )

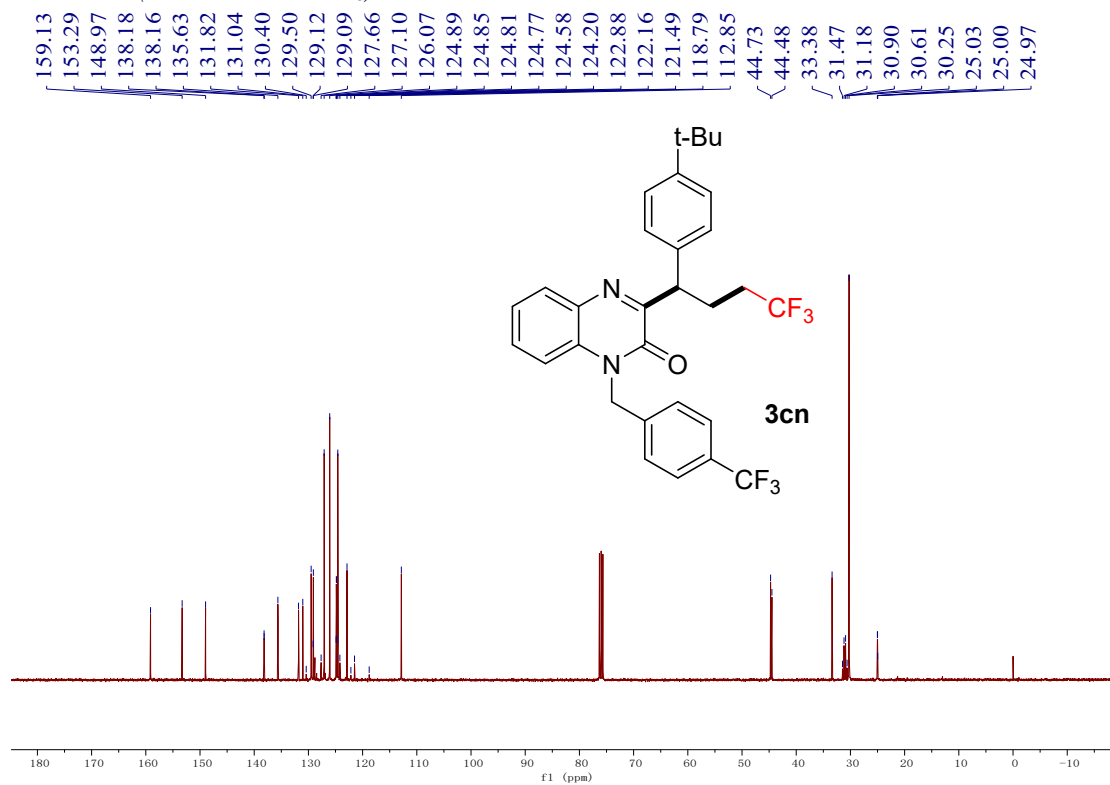

$^{19}\text{F}$  NMR (377 MHz,  $\text{CDCl}_3$ )

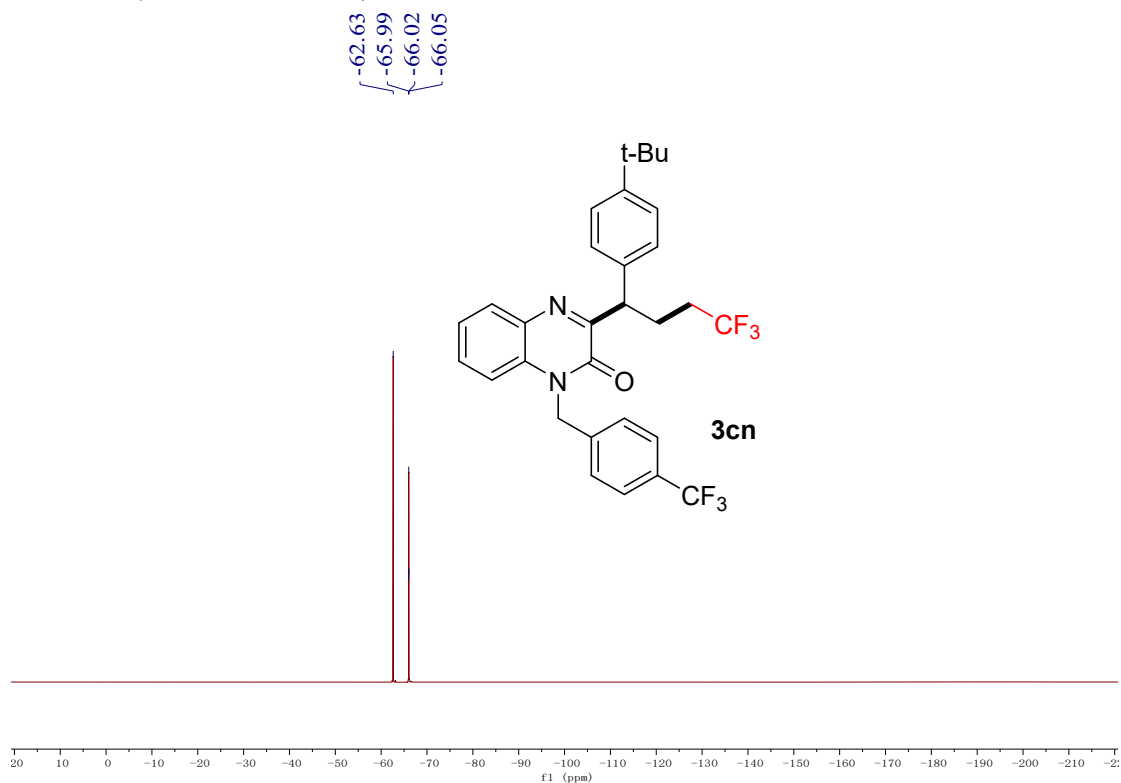

$^1\text{H}$  NMR (400 MHz,  $\text{CDCl}_3$ )

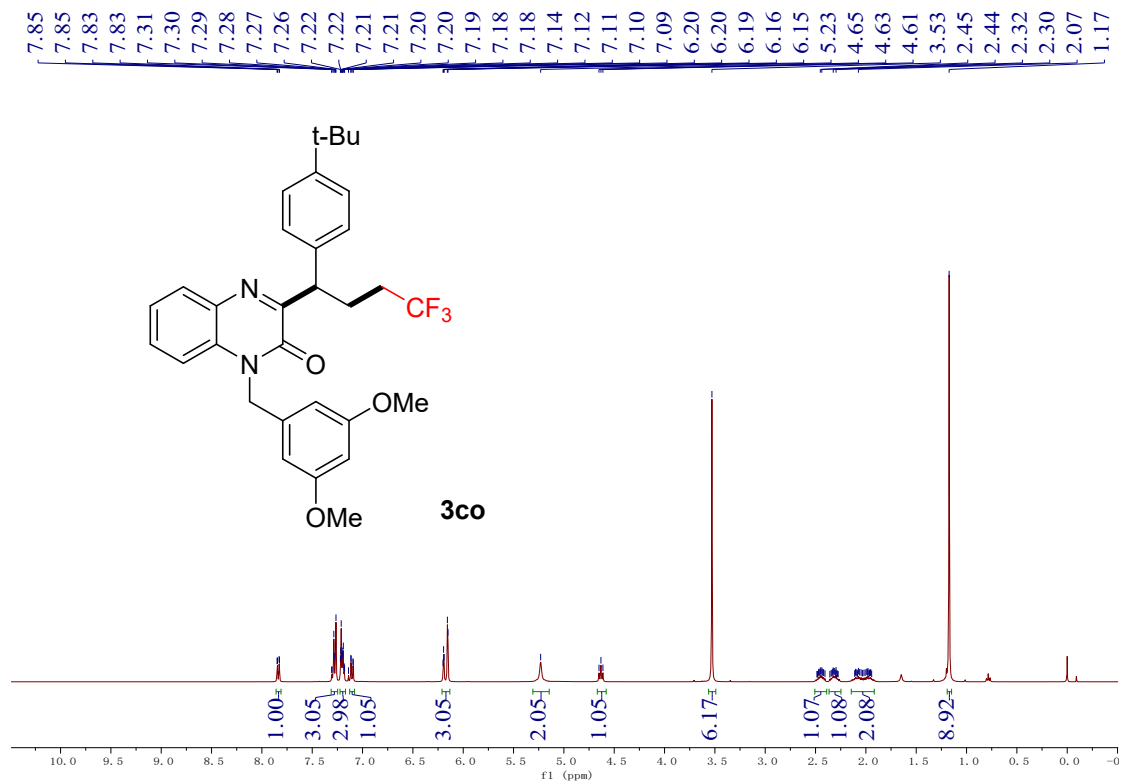

$^{13}\text{C}$  NMR (101 MHz,  $\text{CDCl}_3$ )

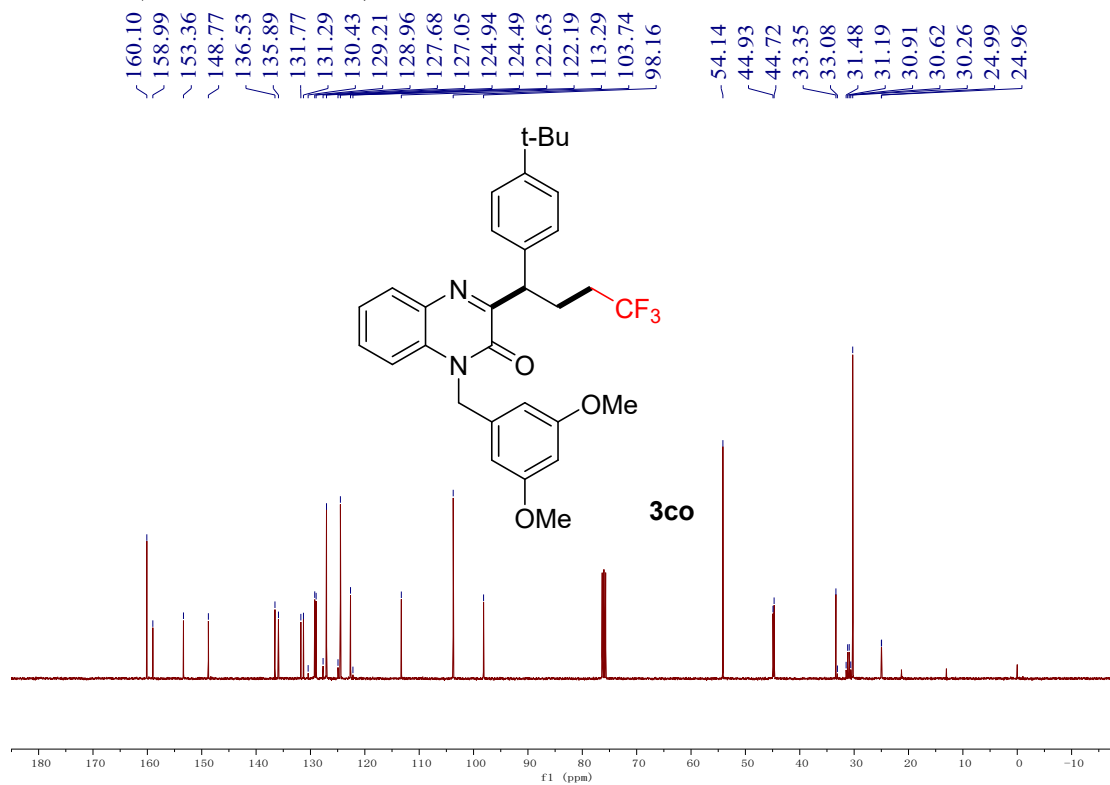

$^{19}\text{F}$  NMR (377 MHz,  $\text{CDCl}_3$ )

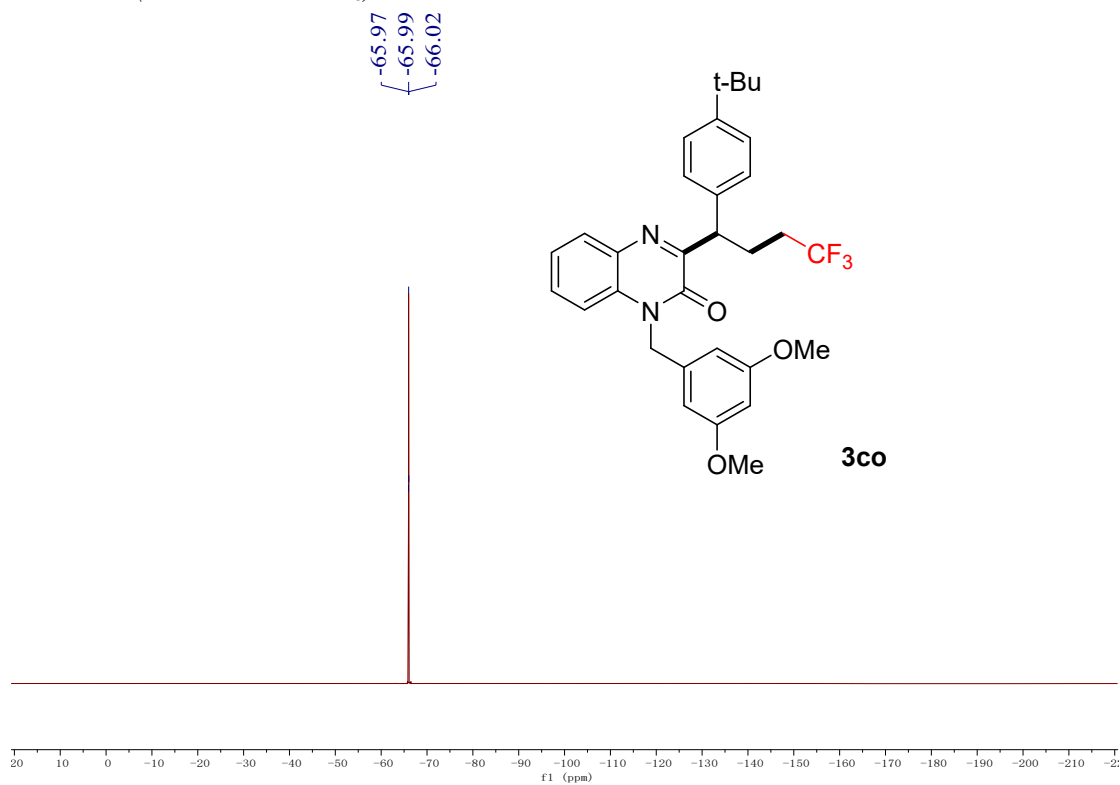



$^1\text{H NMR}$  (400 MHz,  $\text{CDCl}_3$ )

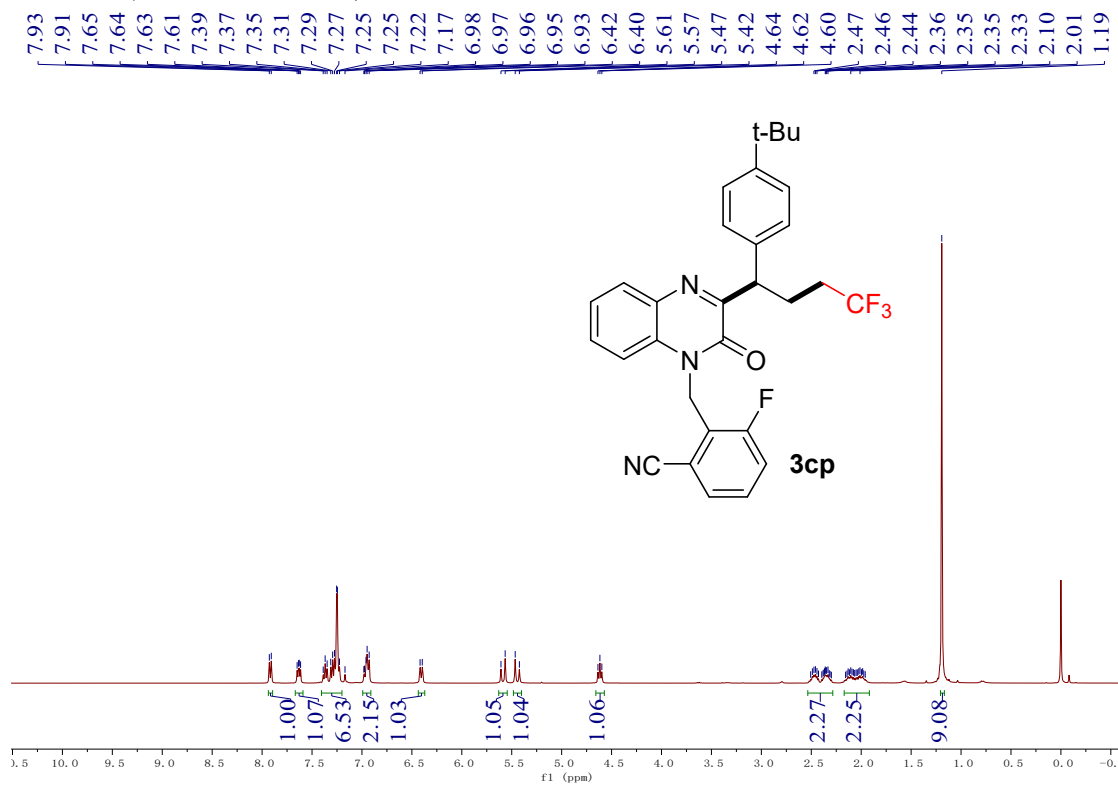

$^{13}\text{C NMR}$  (101 MHz,  $\text{CDCl}_3$ )

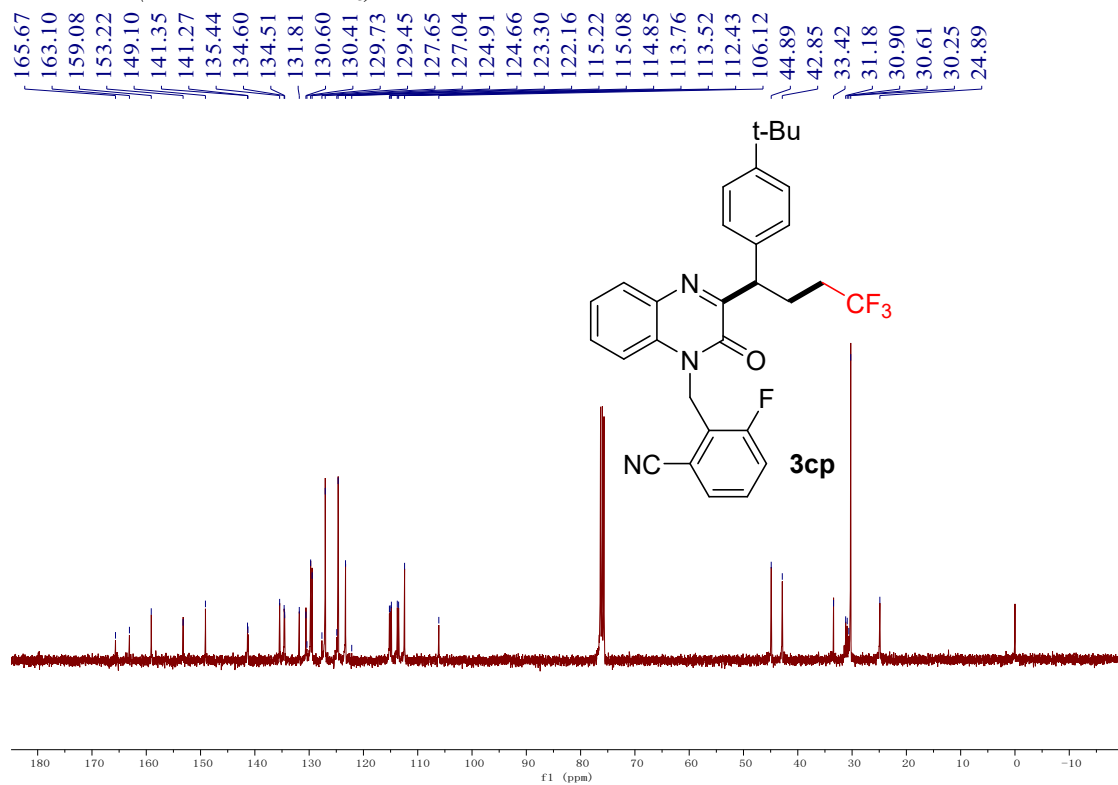

$^{19}\text{F}$  NMR (377 MHz,  $\text{CDCl}_3$ )

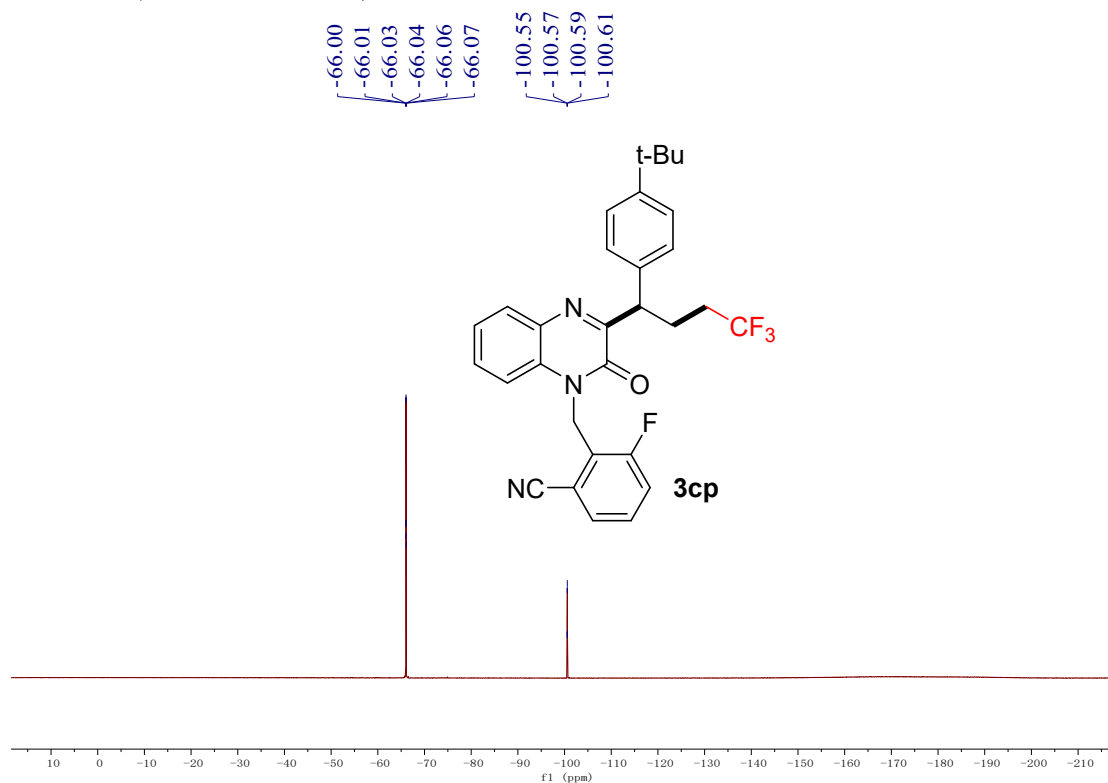

$^1\text{H}$  NMR (400 MHz,  $\text{CDCl}_3$ )

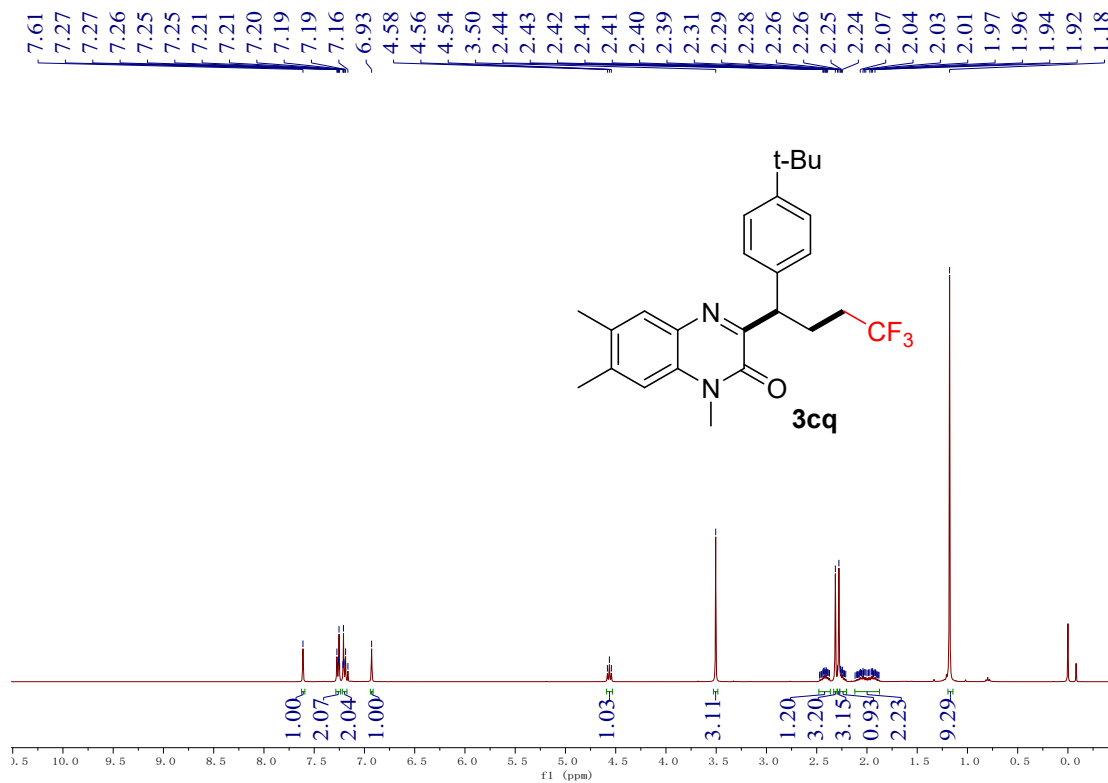

$^{13}\text{C}$  NMR (101 MHz,  $\text{CDCl}_3$ )

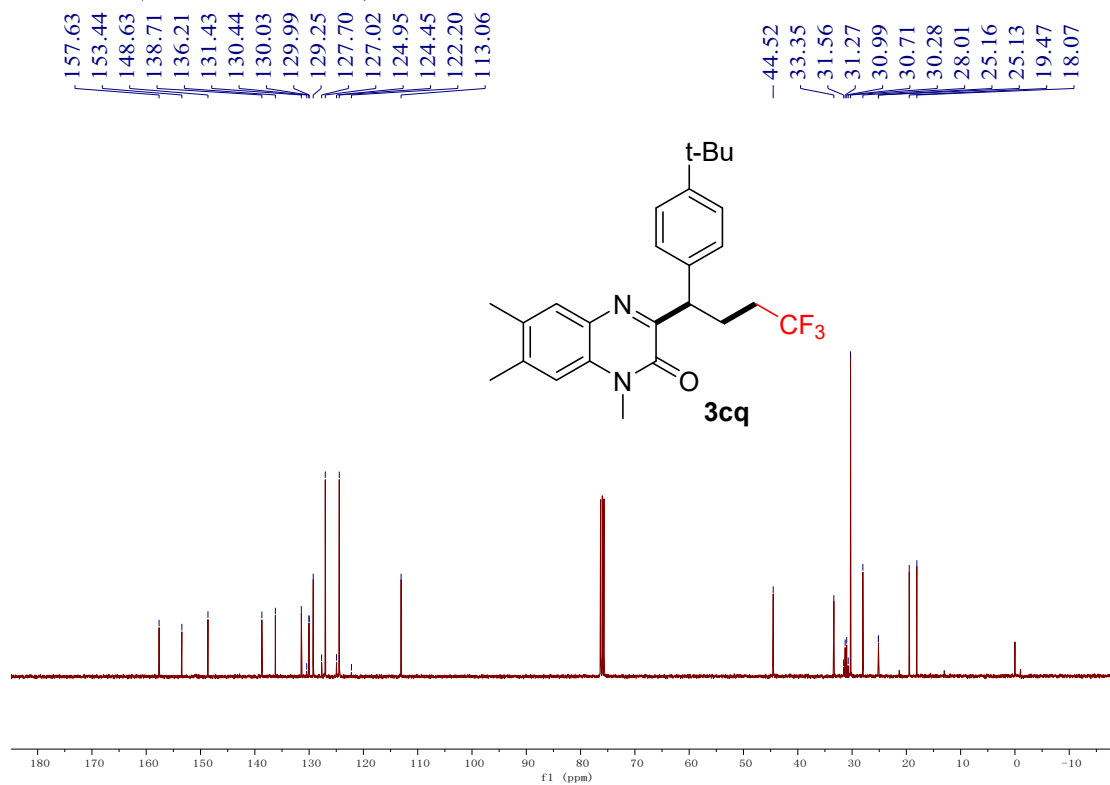

$^{19}\text{F}$  NMR (377 MHz,  $\text{CDCl}_3$ )

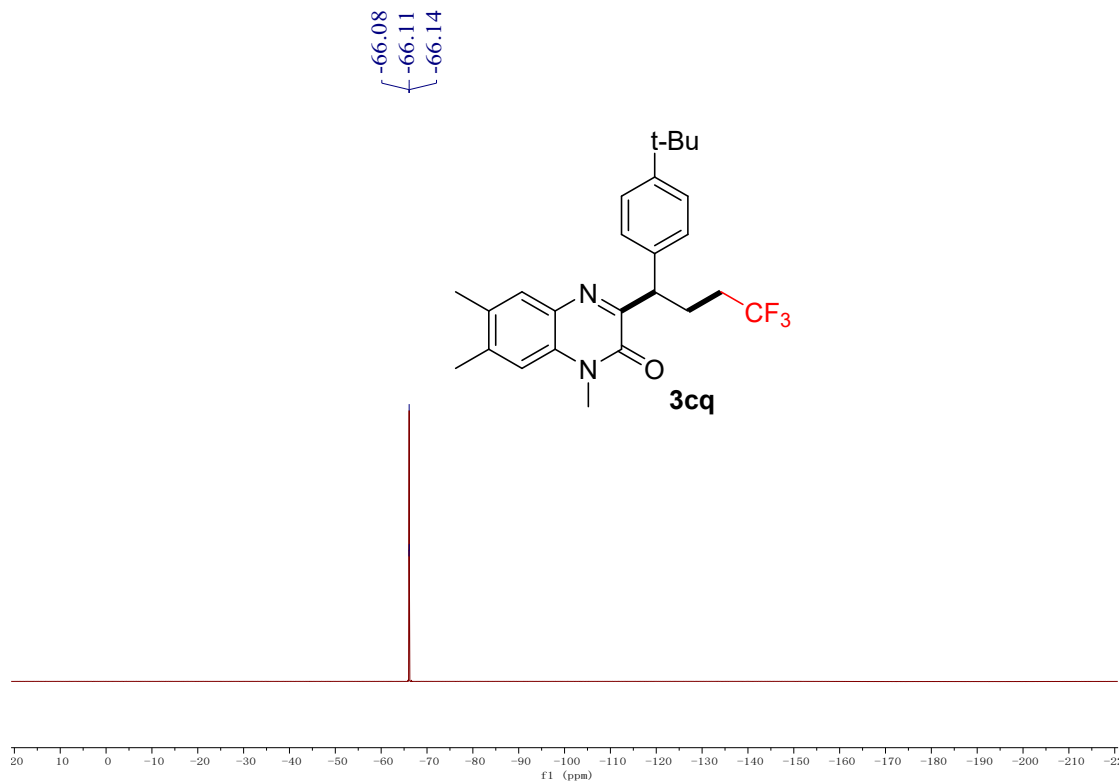

<sup>1</sup>H NMR (400 MHz, CDCl<sub>3</sub>)

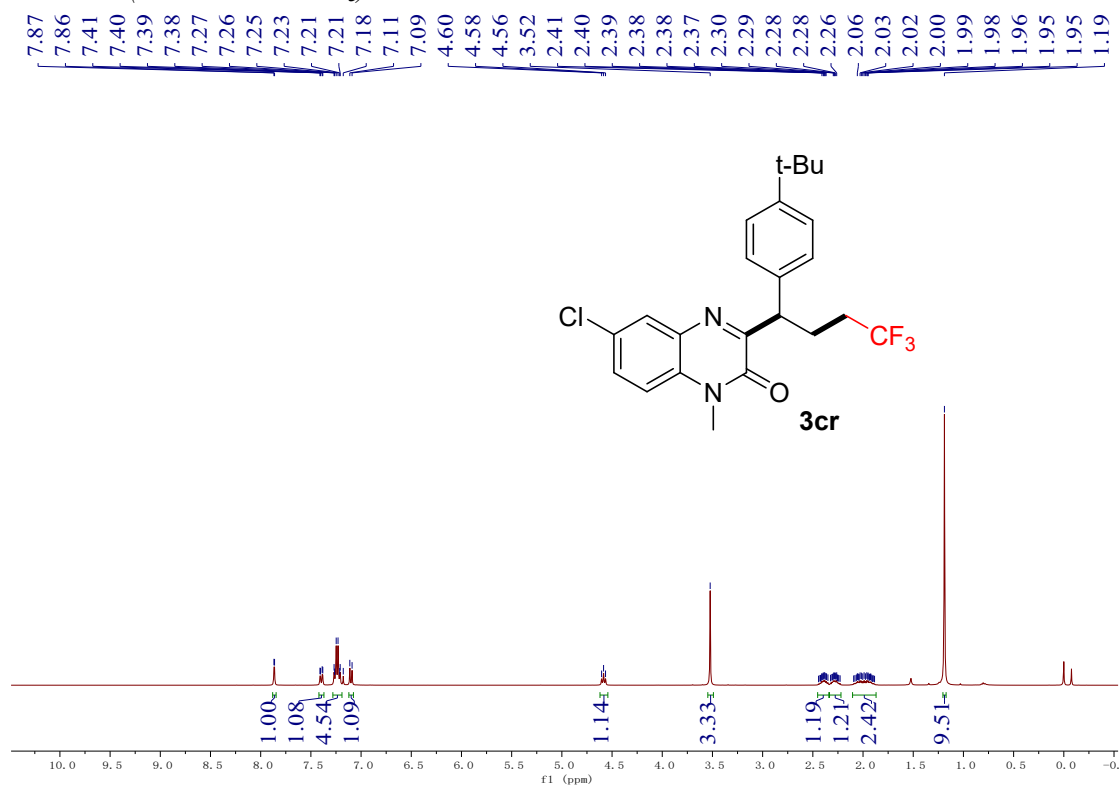

<sup>13</sup>C NMR (101 MHz, CDCl<sub>3</sub>)

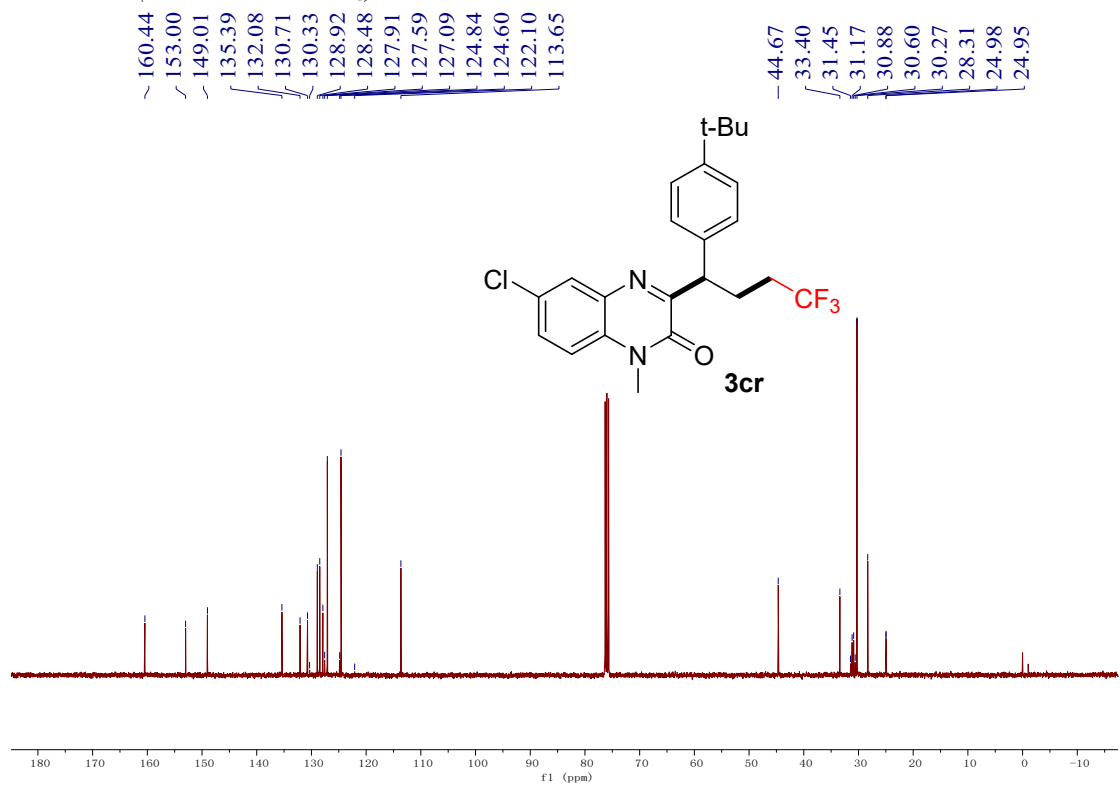

$^{19}\text{F}$  NMR (377 MHz,  $\text{CDCl}_3$ )

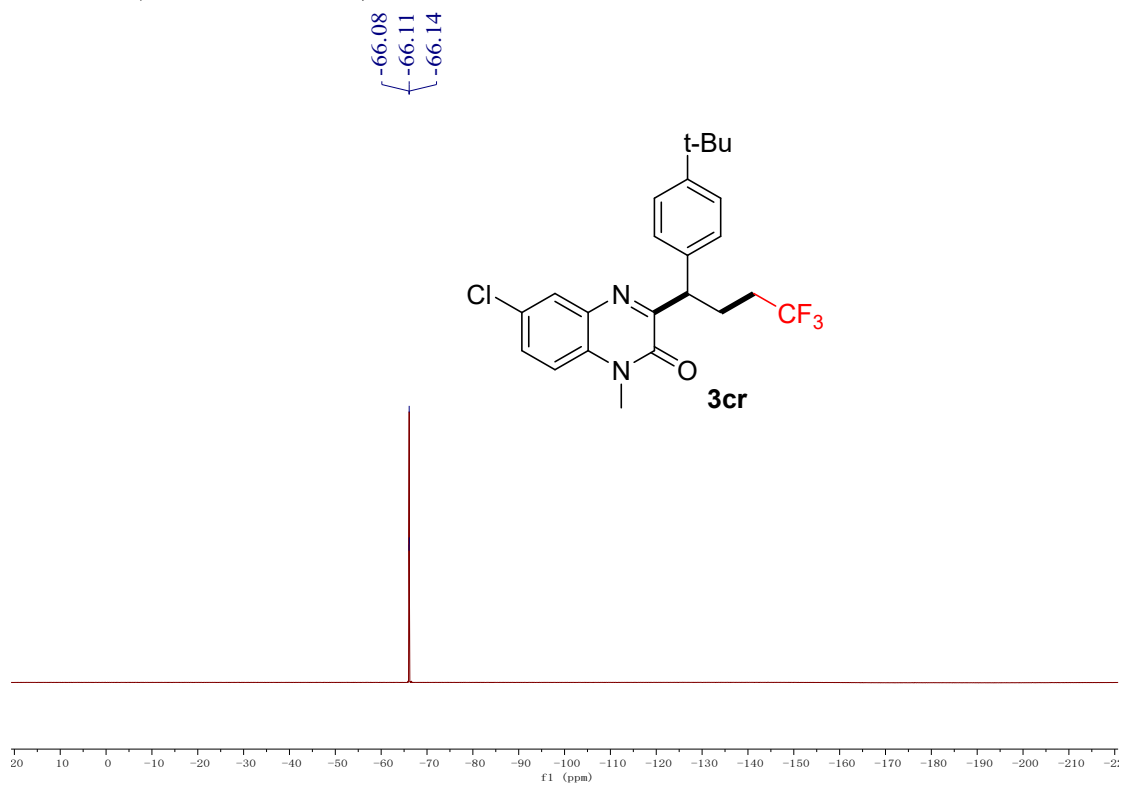

$^1\text{H}$  NMR (400 MHz,  $\text{CDCl}_3$ )

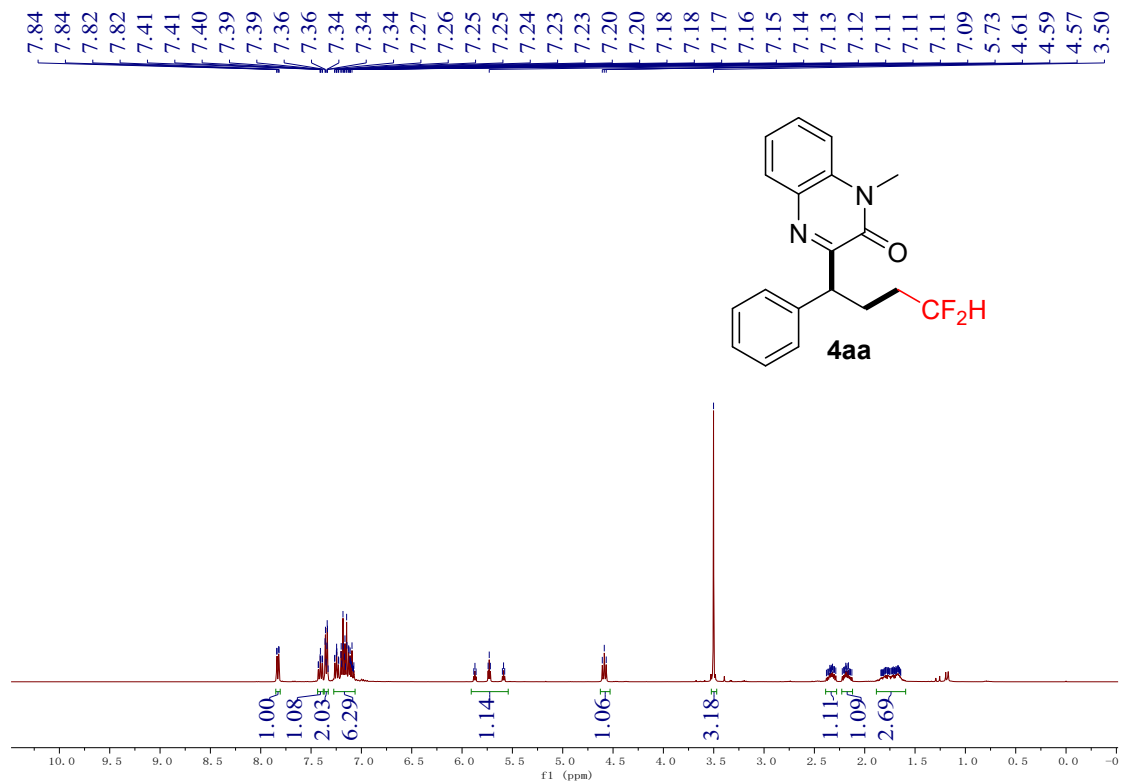

$^{13}\text{C}$  NMR (101 MHz,  $\text{CDCl}_3$ )

-160.23  
-154.42  
140.56  
133.03  
132.63  
130.18  
130.00  
128.61  
128.57  
127.02  
123.58  
119.75  
117.38  
115.00  
113.58

-46.67  
32.59  
32.38  
32.17  
29.15  
26.42  
26.37  
26.31

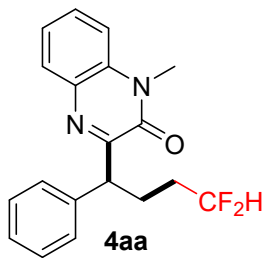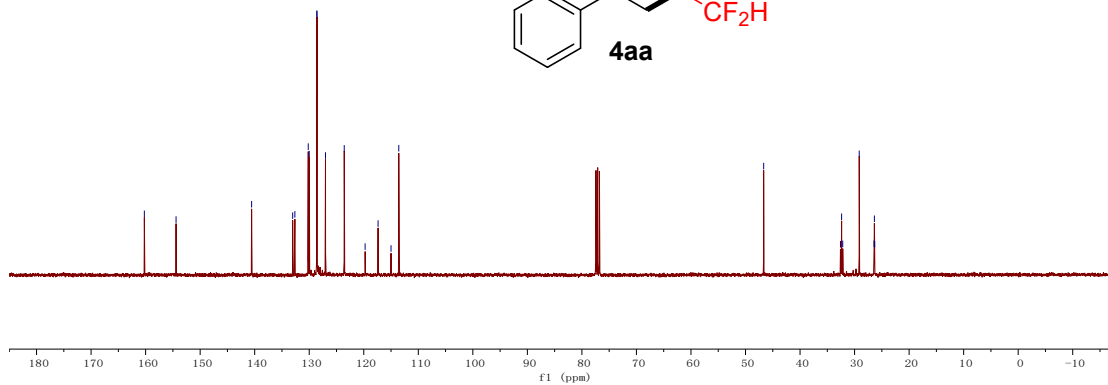

$^{19}\text{F}$  NMR (377 MHz,  $\text{CDCl}_3$ )

-115.47  
-115.51  
-115.56  
-115.62  
-115.67  
-115.71

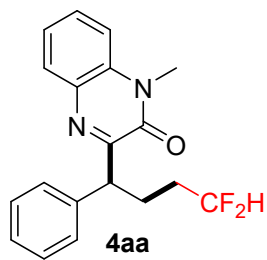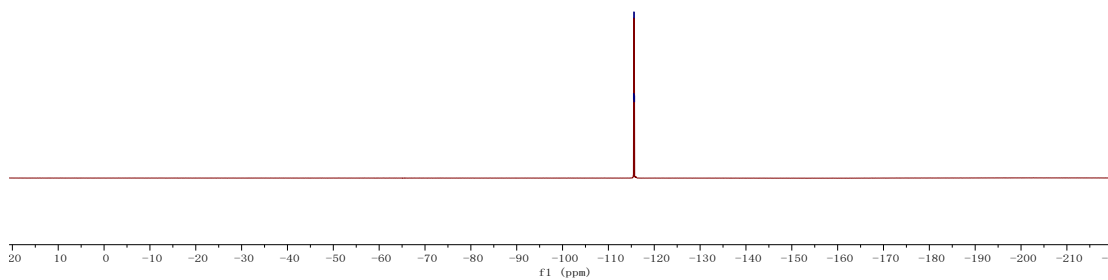

<sup>1</sup>H NMR (400 MHz, CDCl<sub>3</sub>)

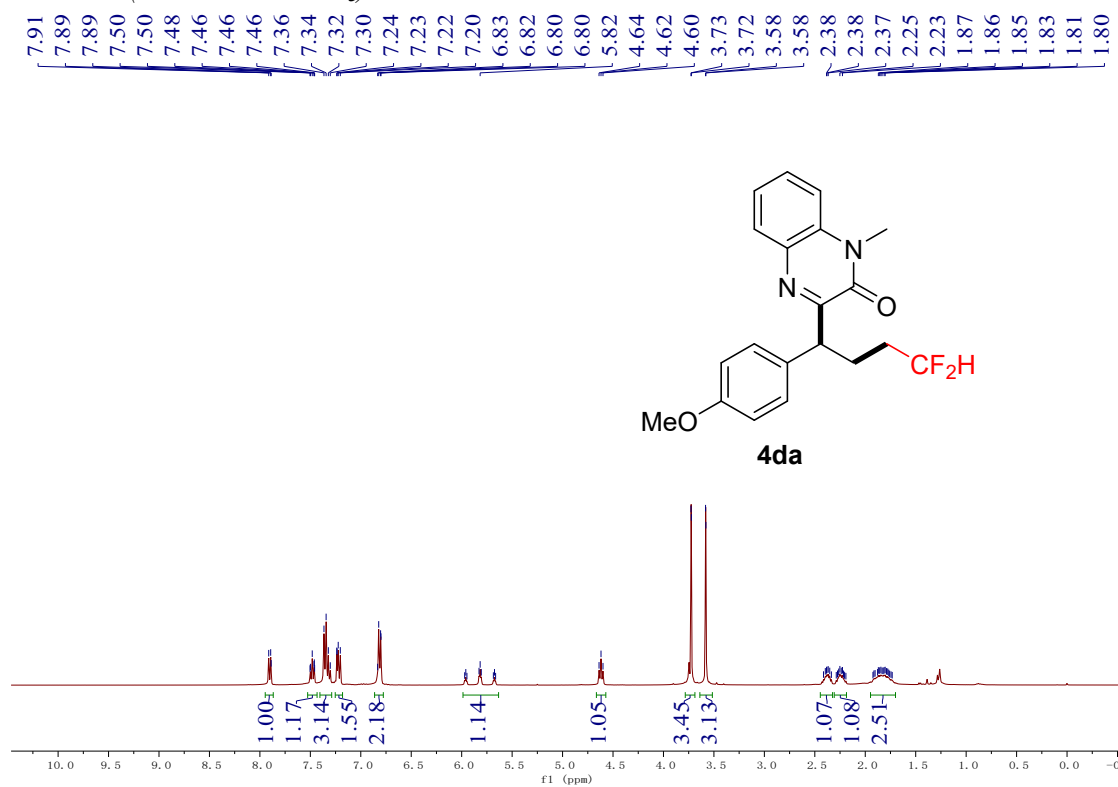

<sup>13</sup>C NMR (101 MHz, CDCl<sub>3</sub>)

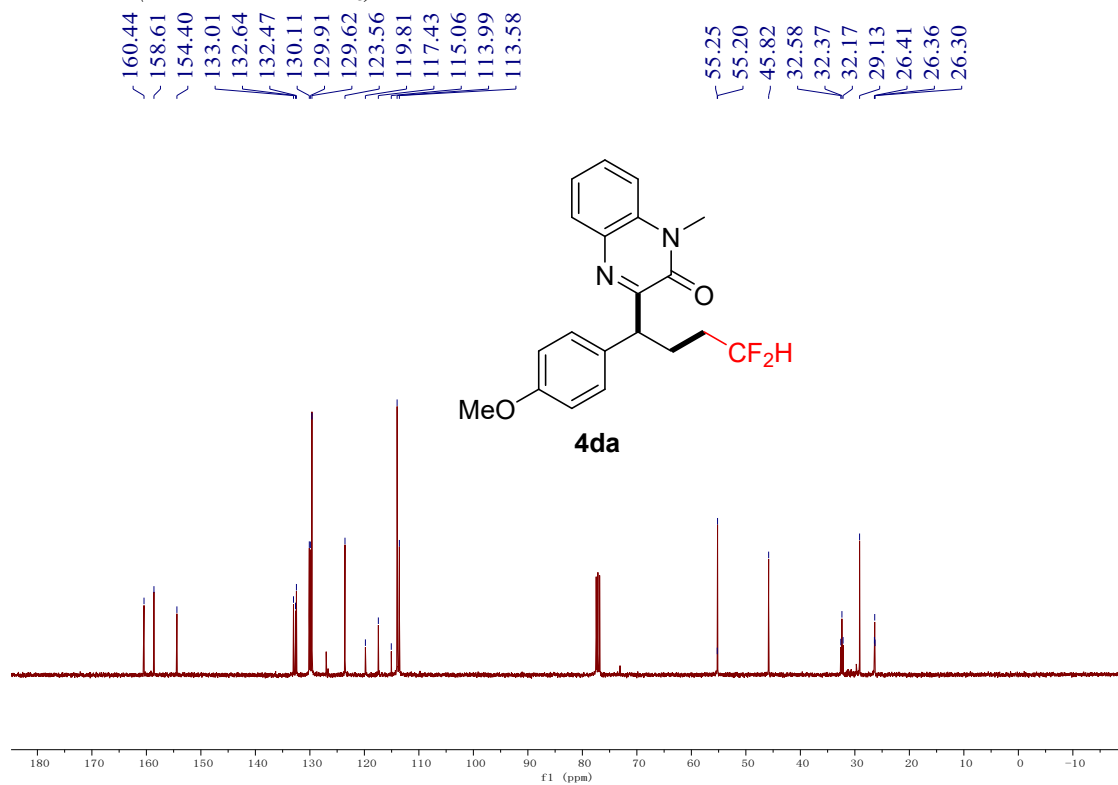

$^{19}\text{F}$  NMR (377 MHz,  $\text{CDCl}_3$ )

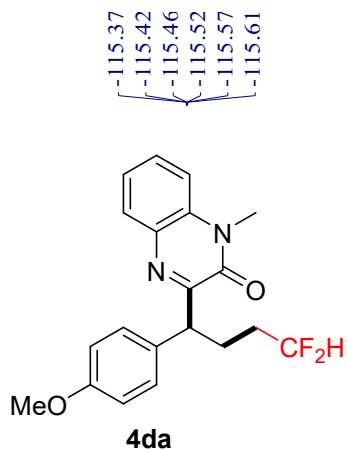

-115.37  
-115.42  
-115.46  
-115.52  
-115.57  
-115.61

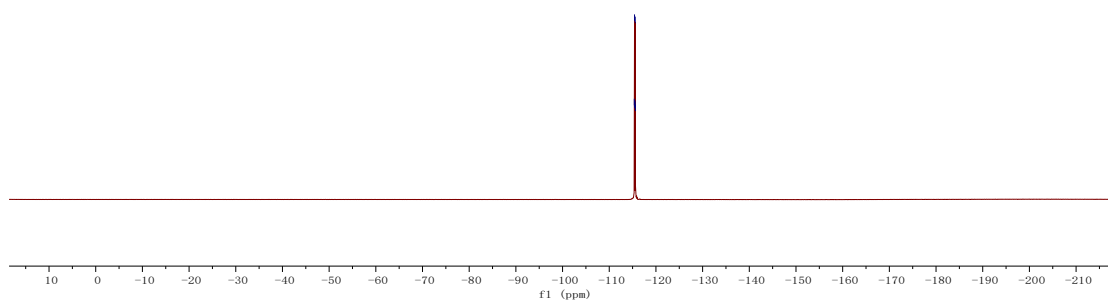

$^1\text{H}$  NMR (400 MHz,  $\text{CDCl}_3$ )

7.92  
7.90  
7.90  
7.54  
7.52  
7.50  
7.42  
7.41  
7.41  
7.40  
7.39  
7.39  
7.37  
7.35  
7.33  
7.26  
7.24  
7.24  
6.98  
6.96  
6.95  
6.94  
6.93  
5.83  
4.69  
4.67  
4.65  
3.61  
3.61  
2.43  
2.41  
2.40  
2.38  
2.25  
2.24  
2.23  
2.21  
1.85  
1.83  
1.80

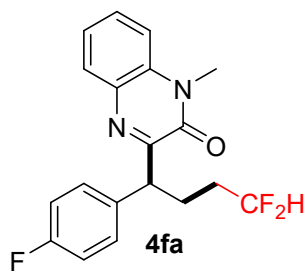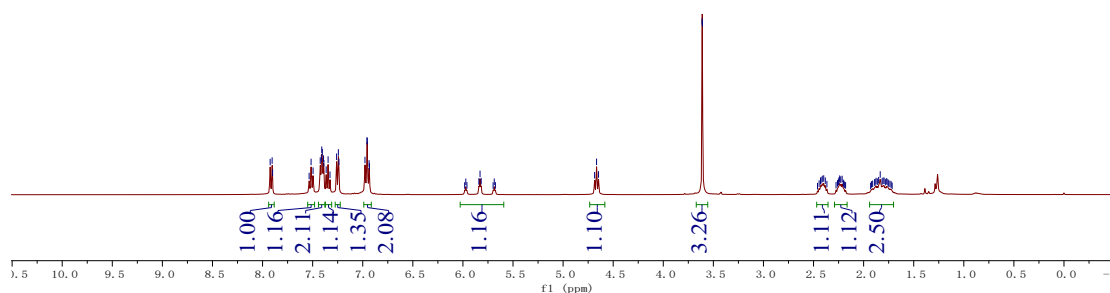



<sup>13</sup>C NMR (101 MHz, CDCl<sub>3</sub>)

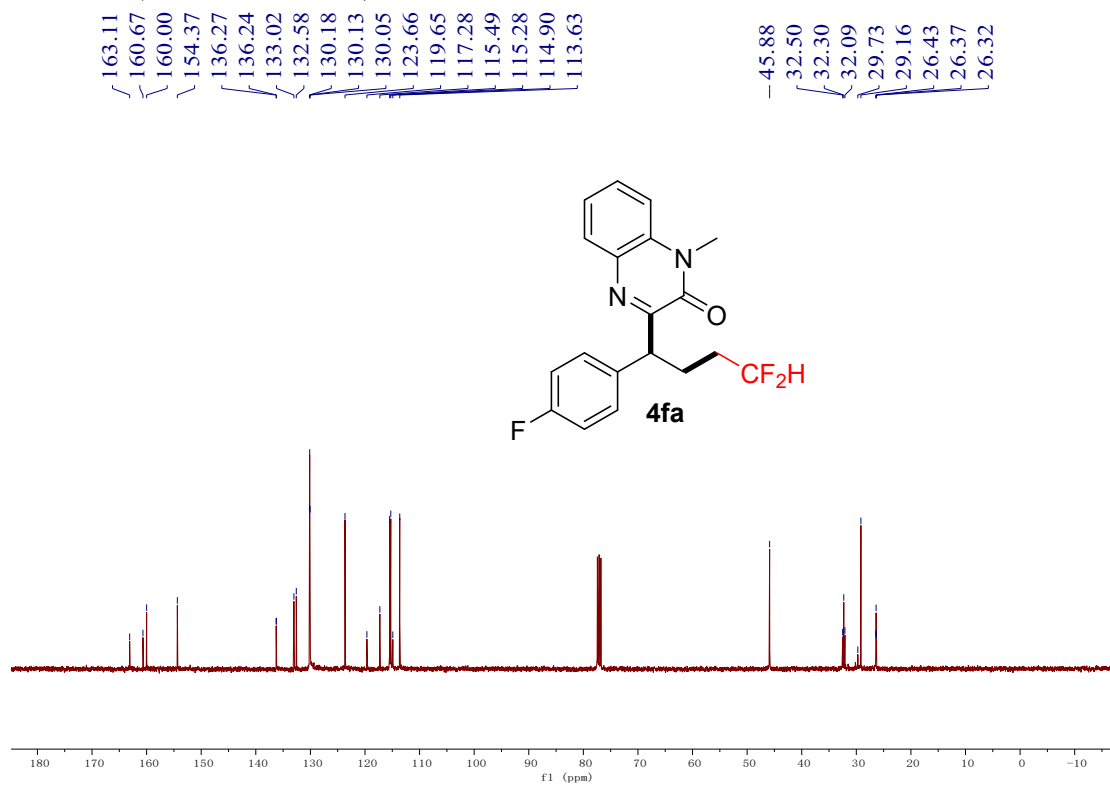

<sup>19</sup>F NMR (377 MHz, CDCl<sub>3</sub>)

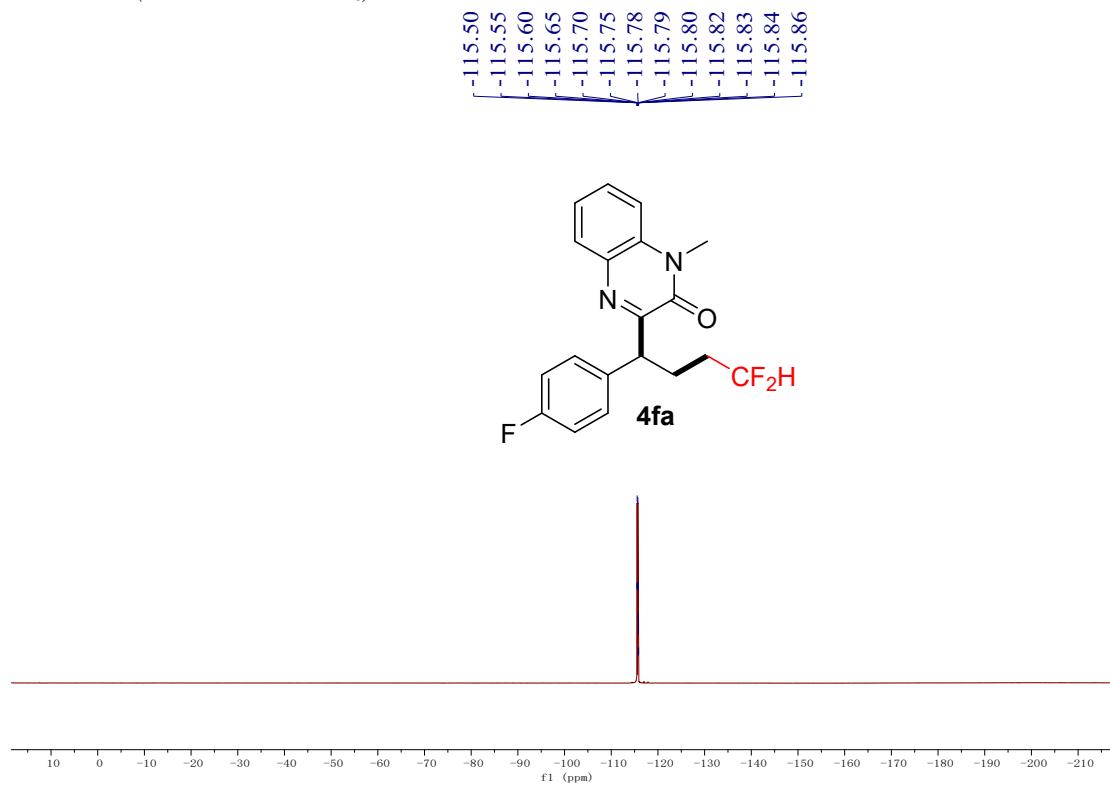

<sup>1</sup>H NMR (400 MHz, CDCl<sub>3</sub>)

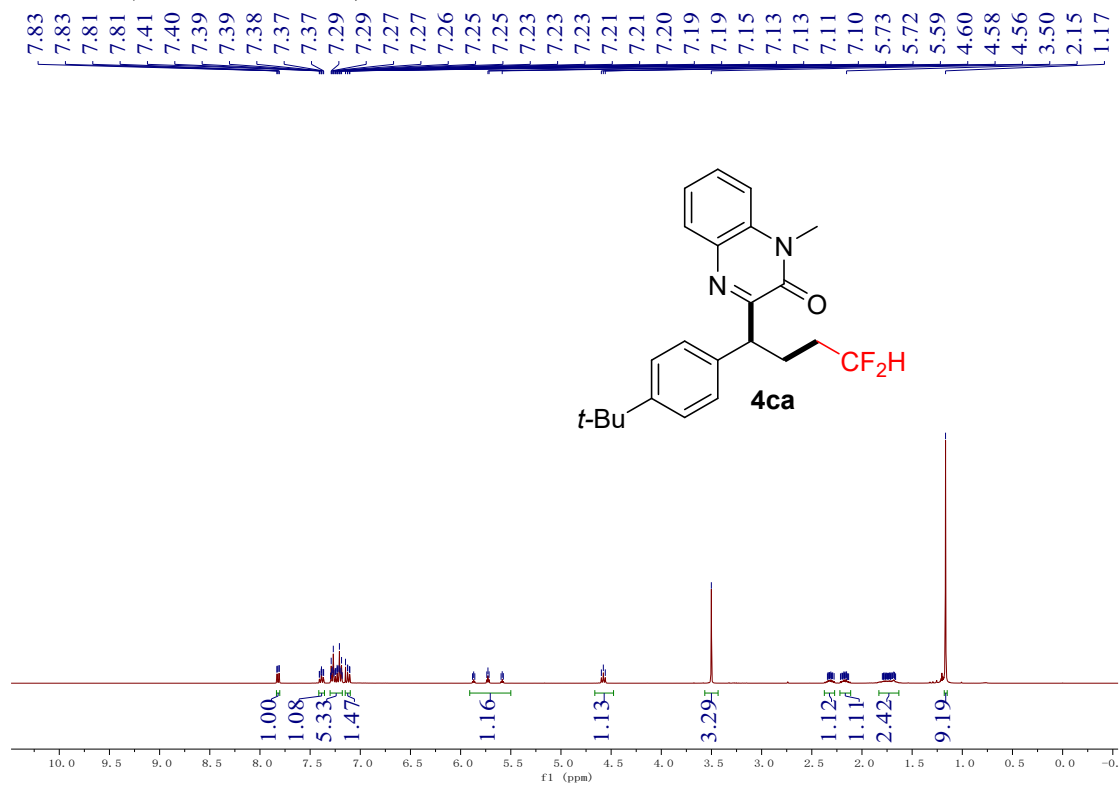

<sup>13</sup>C NMR (101 MHz, CDCl<sub>3</sub>)

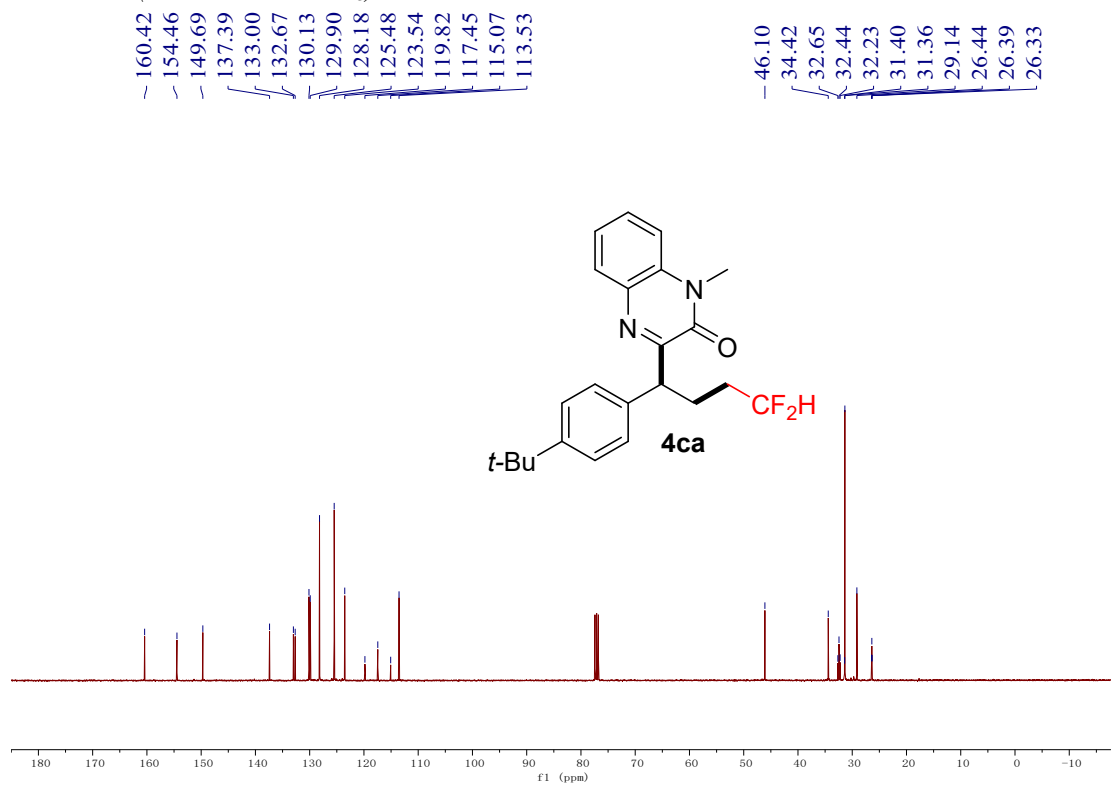

$^{19}\text{F}$  NMR (377 MHz,  $\text{CDCl}_3$ )

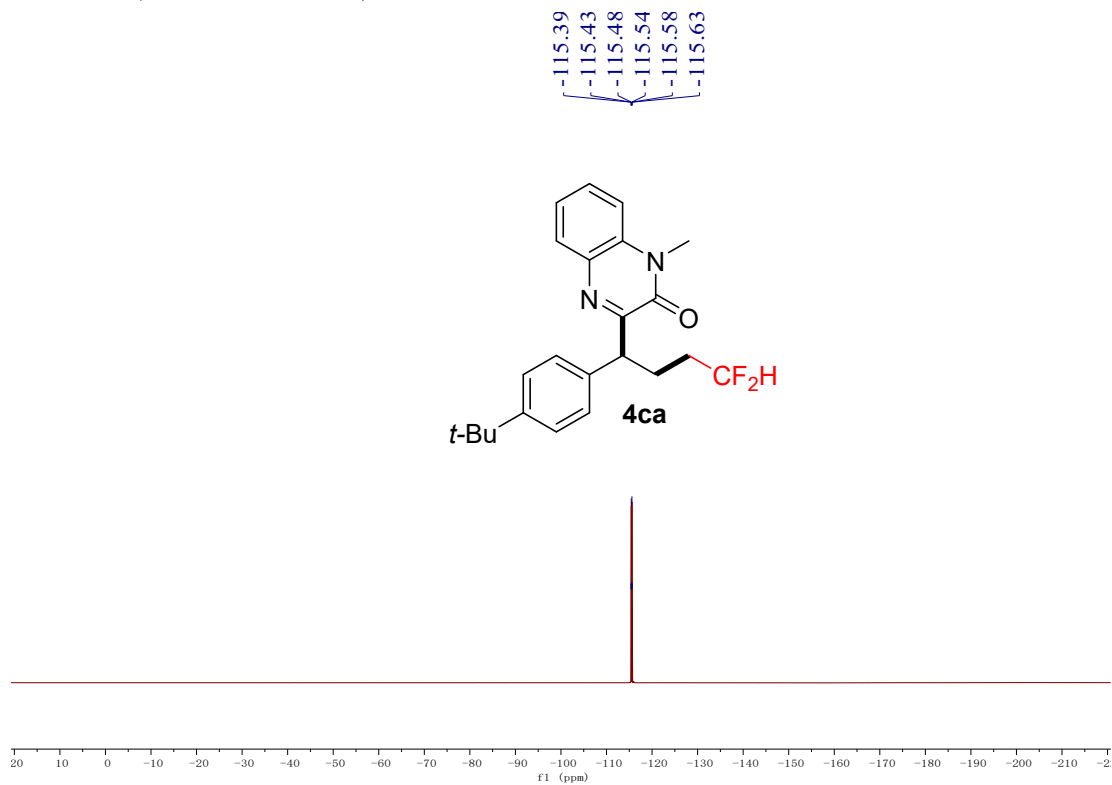

$^1\text{H}$  NMR (400 MHz,  $\text{CDCl}_3$ )

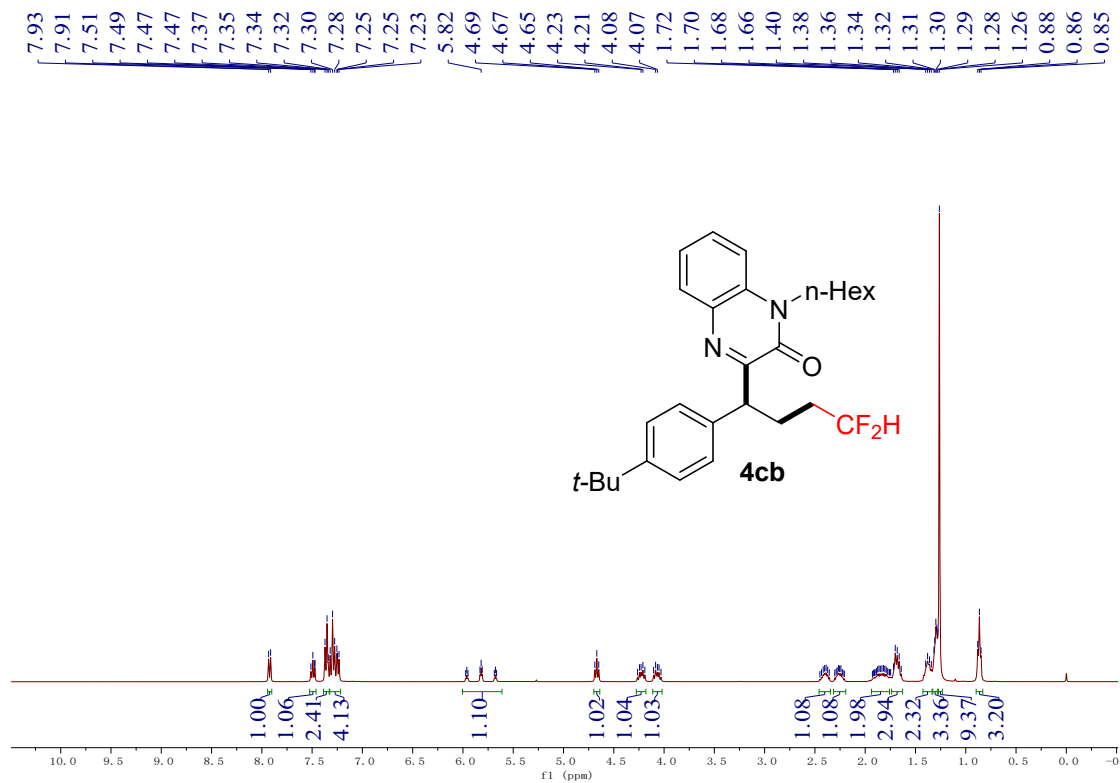

$^{13}\text{C}$  NMR (101 MHz,  $\text{CDCl}_3$ )

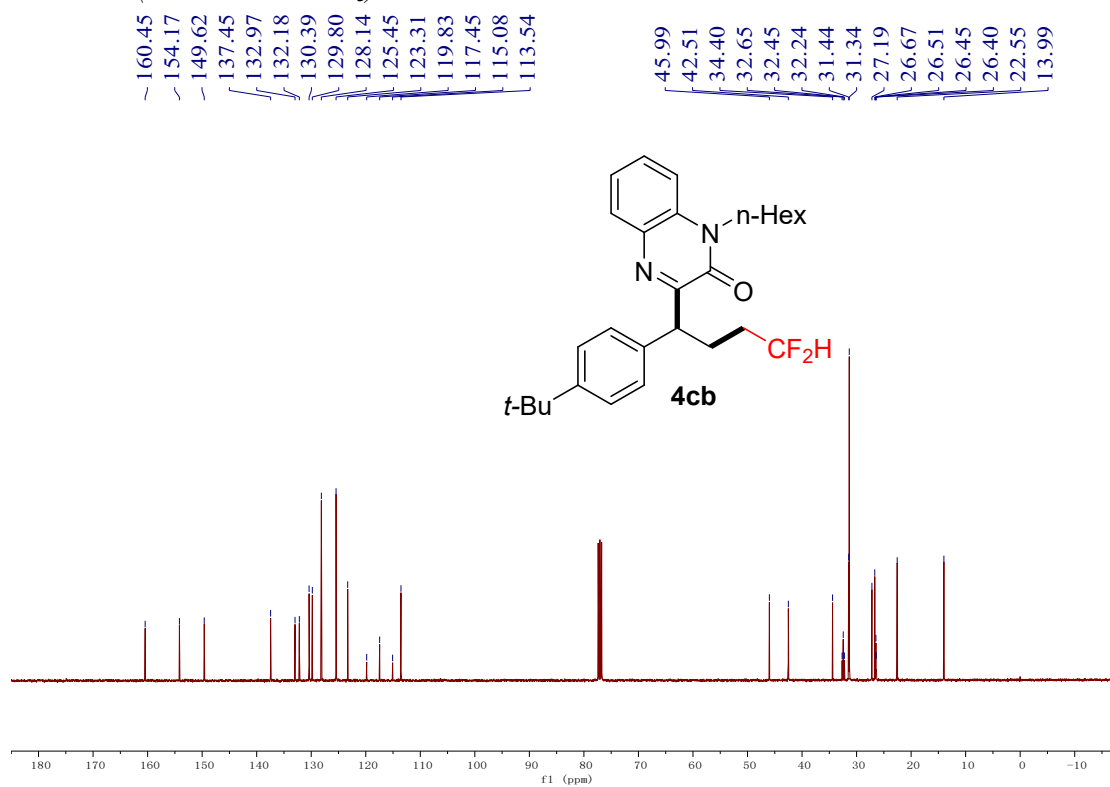

$^{19}\text{F}$  NMR (377 MHz,  $\text{CDCl}_3$ )

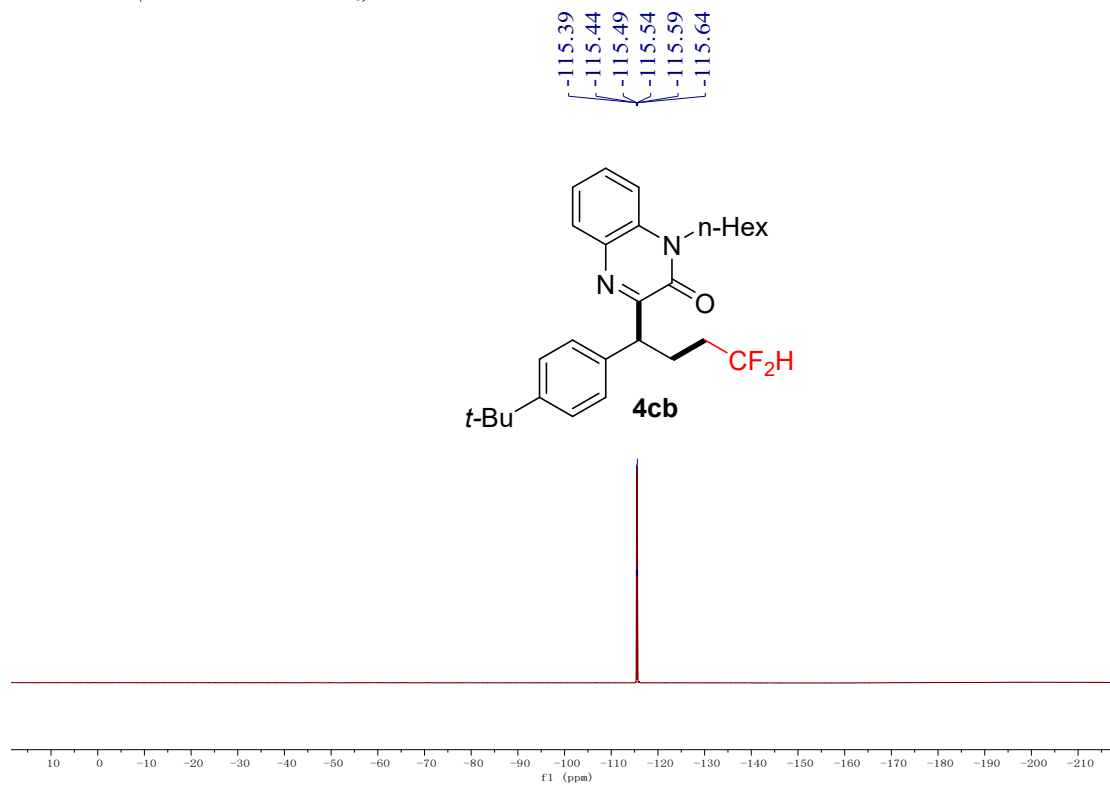

<sup>1</sup>H NMR (400 MHz, CDCl<sub>3</sub>)

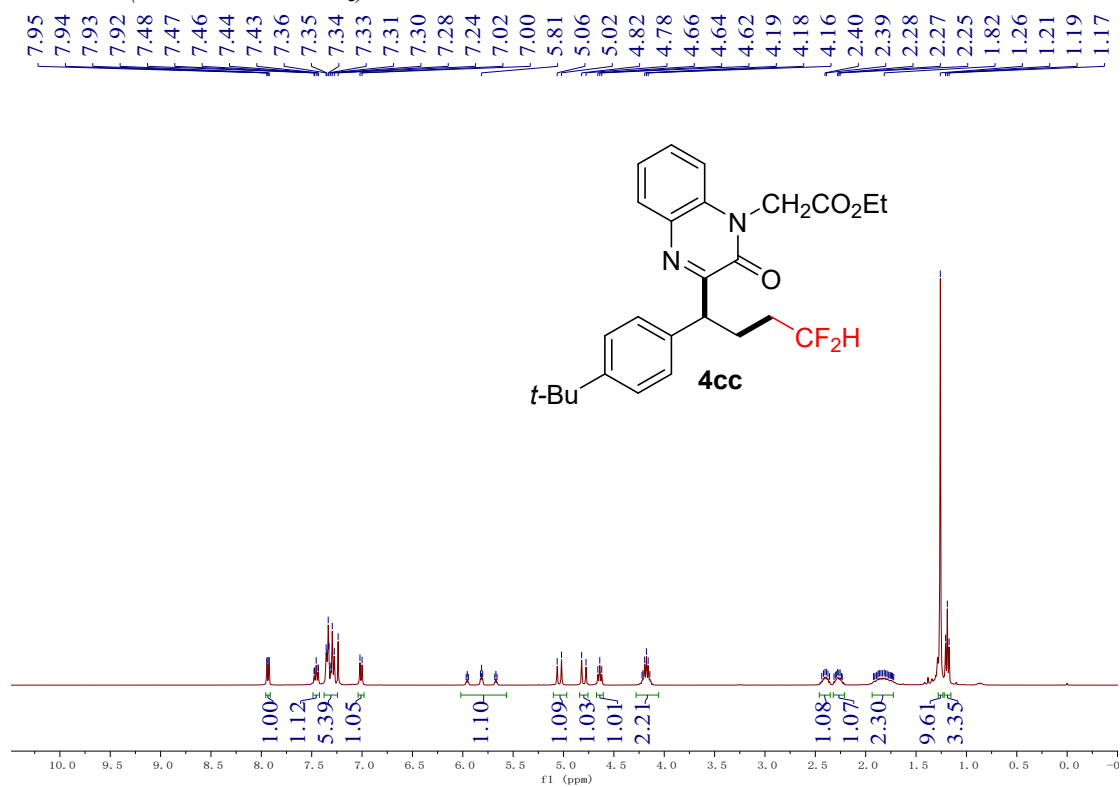

<sup>13</sup>C NMR (101 MHz, CDCl<sub>3</sub>)

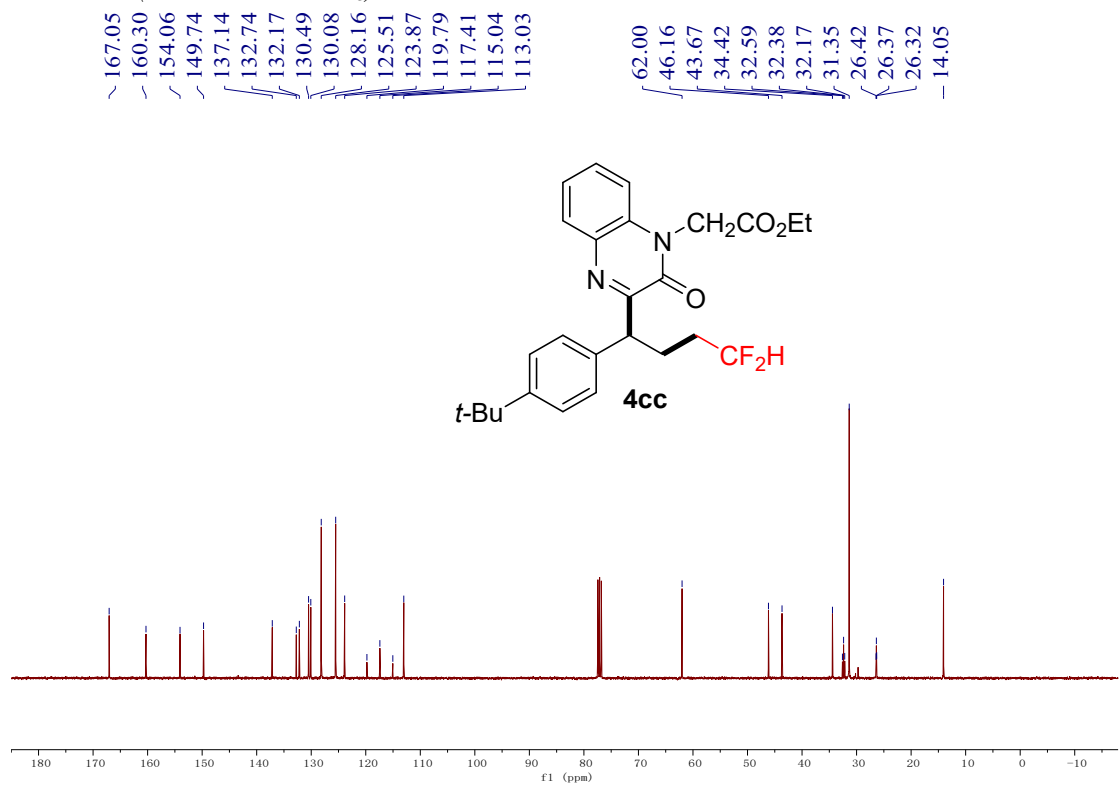

$^{19}\text{F}$  NMR (377 MHz,  $\text{CDCl}_3$ )

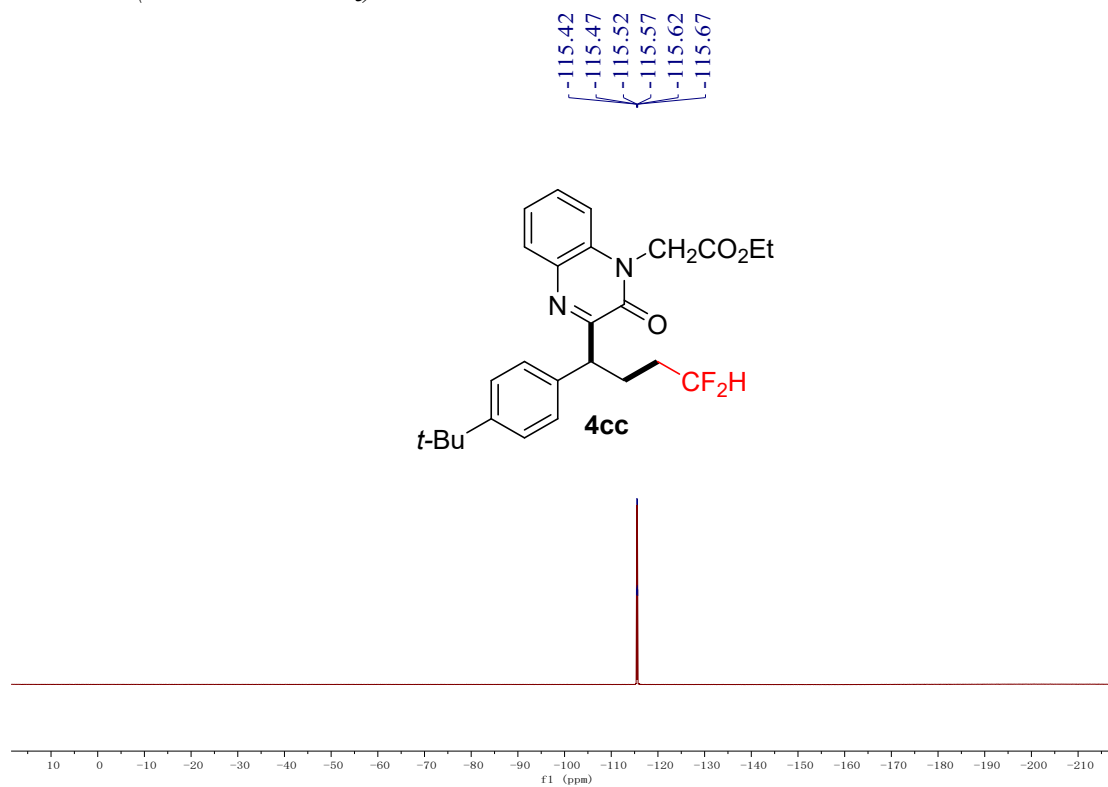

$^1\text{H}$  NMR (400 MHz,  $\text{CDCl}_3$ )

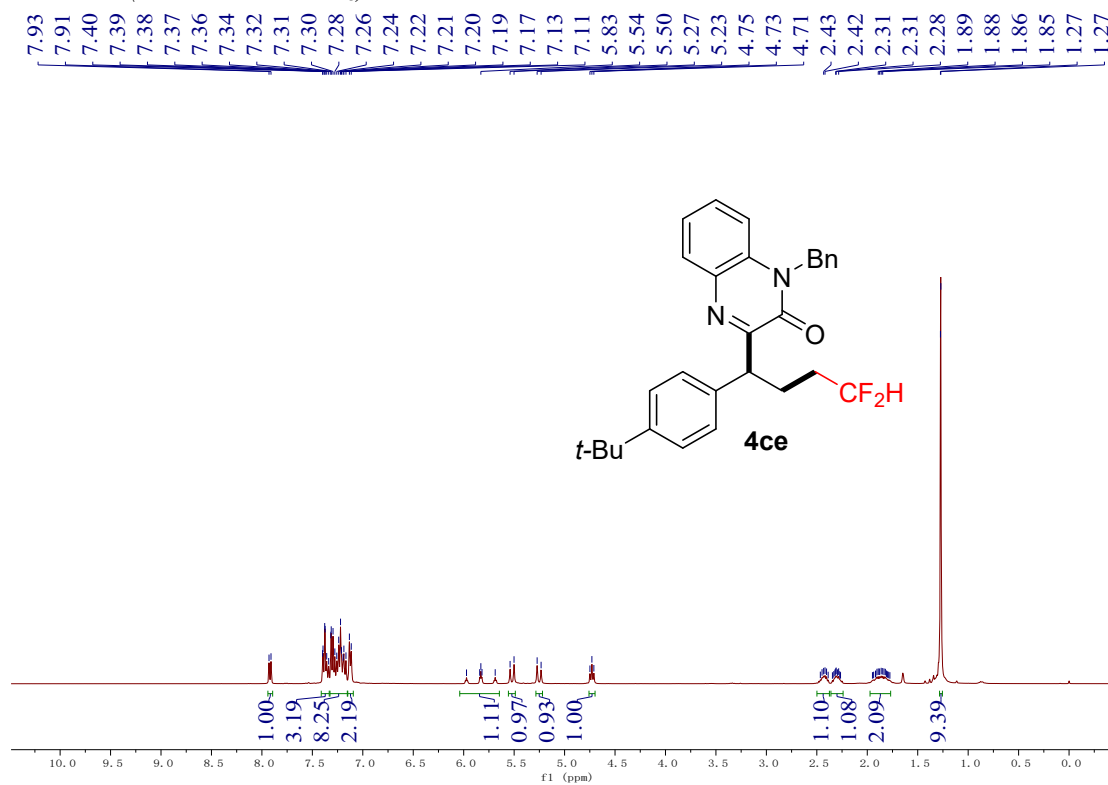

$^{13}\text{C}$  NMR (101 MHz,  $\text{CDCl}_3$ )

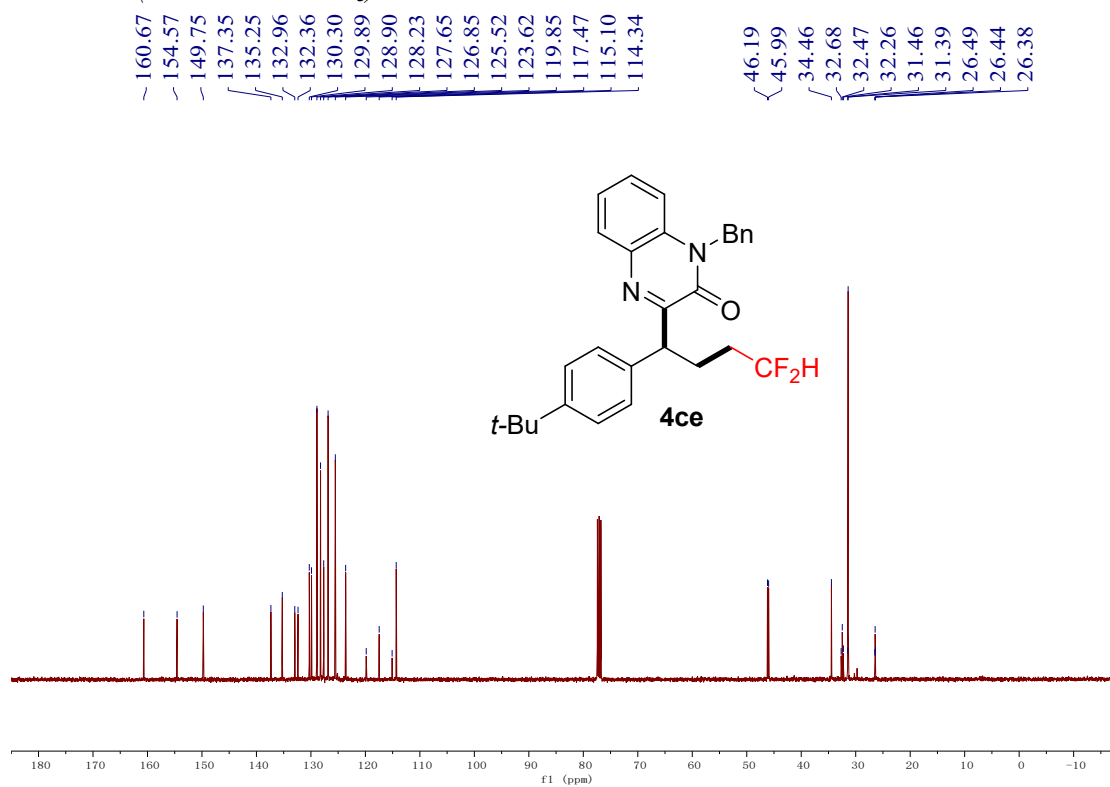

$^{19}\text{F}$  NMR (377 MHz,  $\text{CDCl}_3$ )

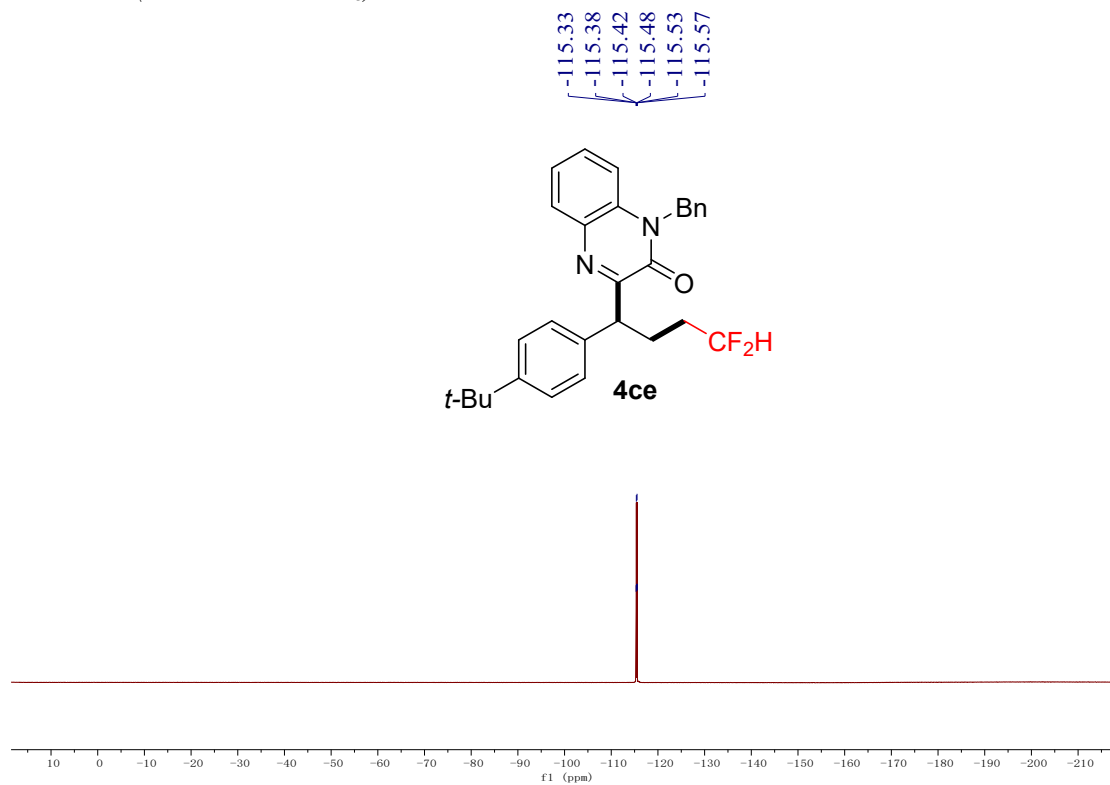





$^{19}\text{F}$  NMR (377 MHz,  $\text{CDCl}_3$ )

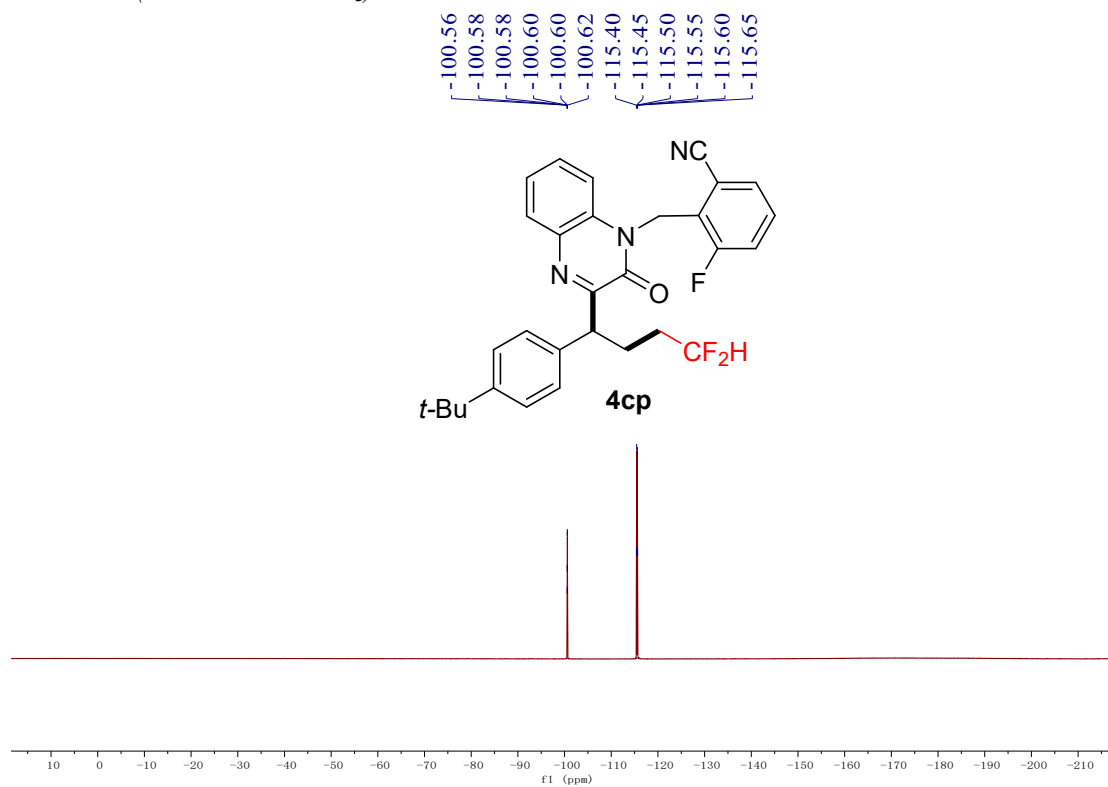

$^1\text{H}$  NMR (400 MHz,  $\text{CDCl}_3$ )

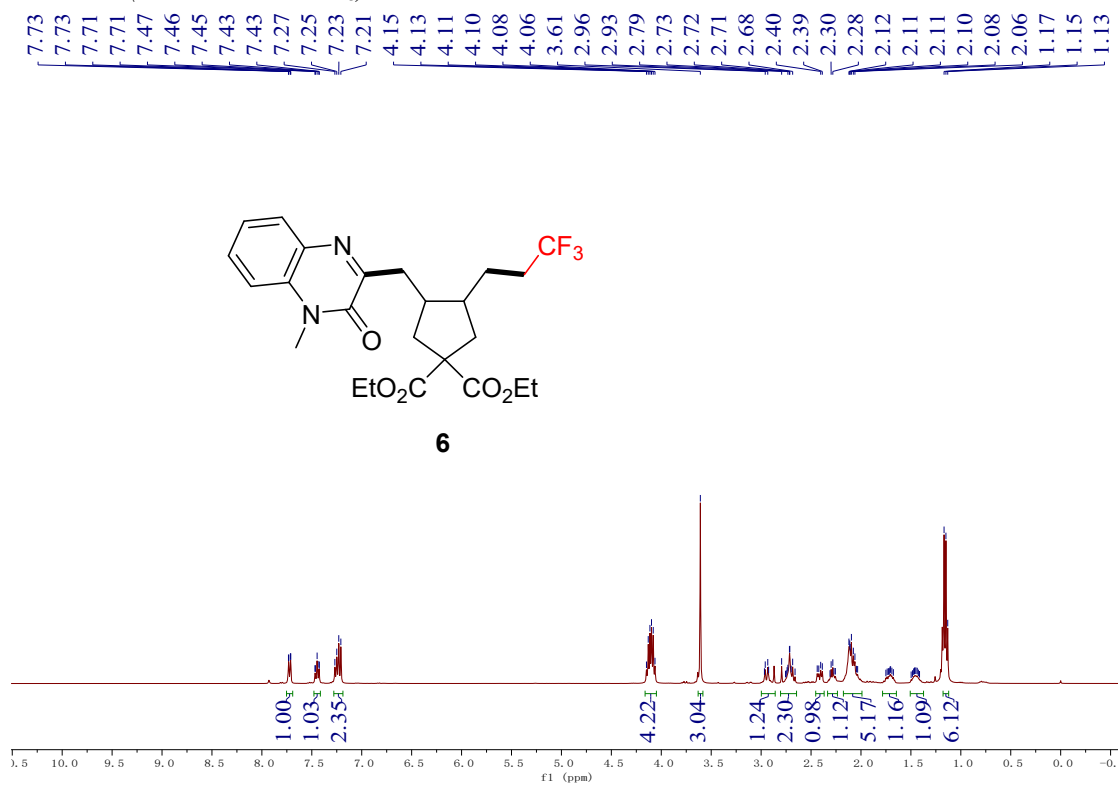

<sup>13</sup>C NMR (101 MHz, CDCl<sub>3</sub>)

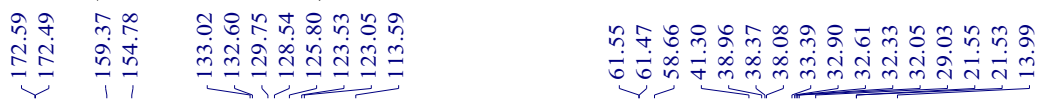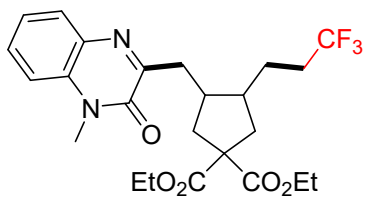

6

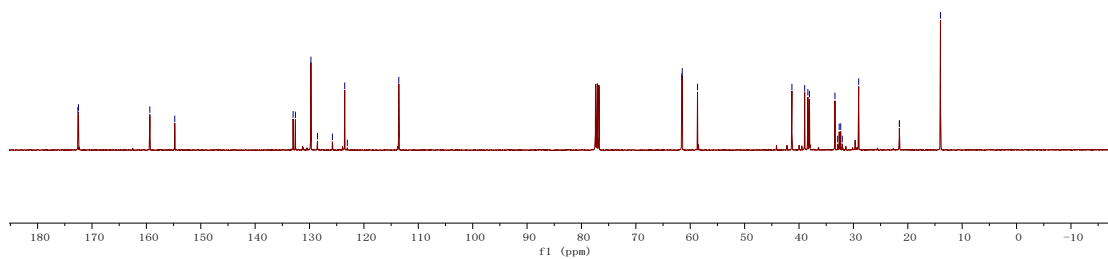

<sup>19</sup>F NMR (377 MHz, CDCl<sub>3</sub>)

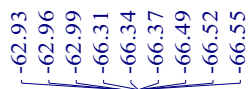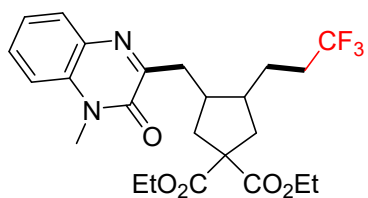

6

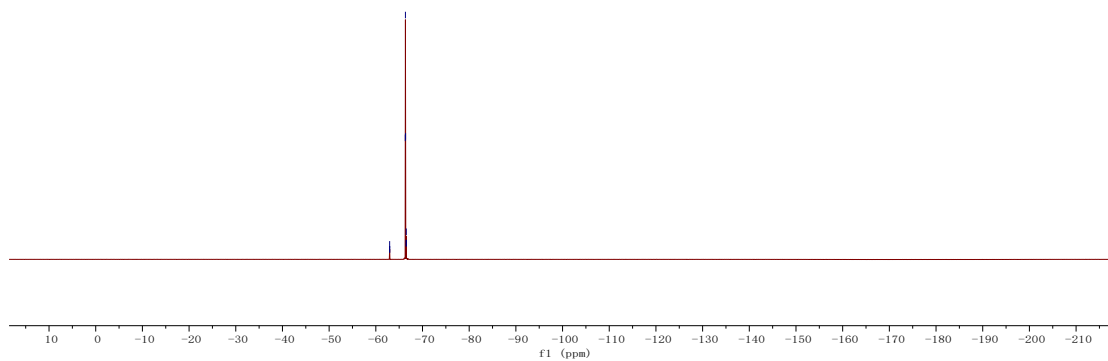

Supplement: d1qo01170g1.pdf [file d1qo01170g1.pdf]
